# Supplementary material for: A Q-marker screening strategy based on ADME studies and systems biology for Chinese herbal medicine, taking Qianghuo Shengshi decoction in treating rheumatoid arthritis as an example
Source: Royal Society of Chemistry journal article supplement (doi:10.1039/d3mo00029j), 2023-07-11
Supplement: d3mo00029j1.pdf [file d3mo00029j1.pdf]

1 **Supplementary data**

2 **A Q-marker screening strategy based on ADME studies and systems biology for Chinese**  
3 **herbal medicine, taking Qianghuo Shengshi decoction in treating rheumatoid arthritis as an**  
4 **example**

5 Jiao Wang <sup>a</sup>, Cimin Tao <sup>a</sup>, Guangzheng Xu <sup>a</sup>, Jiawei Ling <sup>a</sup>, Jie Tong <sup>b</sup>, Bey Hing Goh <sup>a, c</sup>, Yipeng Xu <sup>d</sup>, Linghui Qian  
6 <sup>a</sup>, Yong Chen <sup>a</sup>, Xuesong Liu <sup>a</sup>, Yongjiang Wu <sup>a</sup>, Tengfei Xu <sup>a</sup>, \*

7 <sup>a</sup> *College of Pharmaceutical Sciences, Zhejiang University, Hangzhou 310058, China*

8 <sup>b</sup> *PET Center, Department of Radiology and Biomedical Imaging, Yale School of Medicine, New Haven, CT*  
9 *06520, USA*

10 <sup>c</sup> *Biofunctional Molecule Exploratory Research Group, School of Pharmacy, Monash University Malaysia,*  
11 *Bandar Sunway 47500, Malaysia*

12 <sup>d</sup> *Department of urology, Zhejiang Cancer Hospital, Hangzhou, Zhejiang 310022, China*

13

14 **\* Corresponding author**

15 ***E-mail addresses:*** [tfxu@zju.edu.cn](mailto:tfxu@zju.edu.cn).

## Contents

- 16
- 17
- 18 Text S1. Information of the standards for compound identification comparison.
- 19 Table S1 Identification of 159 compounds in QHSSD by UPLC-Triple-TOF MS.
- 20 Table S2 The *in vivo* metabolites of the absorbable prototypes detected in plasma, urinary, and fecal samples.
- 21 Table S3 The core genes screening through degree evaluation by CytoHubba.
- 22 Table S4 The degree of each compound in the QHSSD-absorbable compound-target-RA network.
- 23 Figure S1. Chemical structures of the coumarins in QHSSD.
- 24 Figure S2. Chemical structures of the flavones in QHSSD.
- 25 Figure S3. Chemical structures of the chromones in QHSSD.
- 26 Figure S4. Chemical structures of the terpenoids in QHSSD.
- 27 Figure S5. Chemical structures of the phenylpropionic acids in QHSSD.
- 28 Figure S6. Chemical structures of the phthalides in QHSSD.
- 29 Figure S7. Chemical structures of the organic acids in QHSSD.
- 30 Figure S8. Chemical structures of the nucleosides, amino acids and other types of compounds in QHSSD.
- 31 Figure S9. Effects of positive drug or Q-marker candidates on the viability of RAW 264.7 cells.
- 32 Figure S10. Phenotypic metabolism changes in LPS-induced RAW264.7 cellular metabolomics study.
- 33 Figure S11. Original image of the western blot experiments (strips of P-ERK, n=3).
- 34 Figure S12. Original image of the western blot experiments (strips of ERK, n=3).
- 35 Figure S13. Original image of the western blot experiments (strips of P-AKT, n=3).
- 36 Figure S14. Original image of the western blot experiments (strips of AKT, n=3).
- 37 Figure S15. Original image of the western blot experiments (strips of  $\beta$ -actin, n=3).
- 38
- 39
- 40

41 **Text S1.** Information of the standards for compound identification comparison.

42 The standards including adenine, adenosine, uridine, guanosine, phenylalanine, chlorogenic acid,  
43 protocatechuic acid, neochlorogenic acid, chlorogenic acid, cryptochlorogenic acid, caffeic acid, isoorientin,  
44 orientin, prim-o-glucosylcimifugin, ferulic acid, neoliquiritin, liquiritin, liquiritin apioside, cimifugin,  
45 nodakenin, 3,4-dicaffeoylquinic acid, 3,5-dicaffeoylquinic acid, 5-O-methylvisammioside, 4,5-dicaffeoylquinic  
46 acid, isoliquiritin apioside, isoliquiritin, ononin, liquiritigenin, sec-O-glucosylhamaudol, isoliquiritigenin,  
47 glycyrrhizic acid, casticin, notopteron, osthole, isoimperatorin, columbianadin, ligustilide, levistolide A (with  
48 purity > 98.0%) were purchased from Systech Standard Technical Services Co., Ltd. (Shanghai, China).

**Table S1** Identification of 159 compounds in QHSSD by UPLC-Triple-TOF MS.

| No | Identification        | Formula                                                         | mol wt.  | Ion form           | Measured m/z | Predicted m/z | Error ppm | RT min | MS <sup>n</sup>                                 | Classification   | Absorbable component | Refs. |
|----|-----------------------|-----------------------------------------------------------------|----------|--------------------|--------------|---------------|-----------|--------|-------------------------------------------------|------------------|----------------------|-------|
| 1  | Sucrose               | C <sub>12</sub> H <sub>22</sub> O <sub>11</sub>                 | 342.1162 | [M-H] <sup>-</sup> | 341.1089     | 341.1088      | -0.5      | 1.53   | 59.0182, 71.0163, 89.0254, 101.0245             | Saccharide       | No                   | 1     |
| 2  | Adenine*              | C <sub>5</sub> H <sub>5</sub> N <sub>5</sub>                    | 135.0545 | [M+H] <sup>+</sup> | 136.0618     | 136.0626      | 5.9       | 1.55   | 65.0174, 54.0037, 67.0329, 119.0376             | Nucleoside       | No                   | 2     |
| 3  | Citric acid           | C <sub>6</sub> H <sub>8</sub> O <sub>7</sub>                    | 192.0270 | [M-H] <sup>-</sup> | 191.0197     | 191.0208      | 5.4       | 1.98   | 57.0432, 67.0214, 85.0326, 87.0095, 111.0113    | Organic acid     | No                   | 2     |
| 4  | DL-Pyroglutamic acid  | C <sub>5</sub> H <sub>7</sub> O <sub>3</sub> N                  | 129.0426 | [M+H] <sup>+</sup> | 130.0499     | 130.0508      | 6.8       | 2.14   | 56.0546, 84.0466                                | Amino acid       | No                   | 2     |
| 5  | Uridine*              | C <sub>9</sub> H <sub>12</sub> O <sub>6</sub> N <sub>2</sub>    | 244.0695 | [M-H] <sup>-</sup> | 243.0623     | 243.0628      | 2.1       | 2.94   | 82.0321, 81.0306, 110.0277                      | Nucleoside       | No                   | 2     |
|    |                       |                                                                 |          | [M+H] <sup>+</sup> | 245.0768     | 245.0807      | 9.6       | 2.94   | 133.0150, 150.0408, 108.0202                    |                  |                      |       |
| 6  | 3',5'-Cyclic GMP      | C <sub>10</sub> H <sub>12</sub> N <sub>5</sub> O <sub>7</sub> P | 345.0474 | [M-H] <sup>-</sup> | 344.0402     | 344.0405      | 0.8       | 6.42   | 113.0345, 113.0467, 96.0087, 70.0301            | Nucleoside       | Yes                  | 2     |
|    |                       |                                                                 |          | [M+H] <sup>+</sup> | 346.0547     | 346.0550      | 0.9       | 6.43   | 152.0569, 135.0309, 110.0367, 153.0411          |                  |                      |       |
| 7  | Guanosine*            | C <sub>10</sub> H <sub>13</sub> O <sub>5</sub> N <sub>5</sub>   | 283.0917 | [M-H] <sup>-</sup> | 282.0844     | 282.0848      | 1.3       | 6.48   | 133.0153, 150.0415, 108.0201, 66.0123           | Nucleoside       | No                   | 2     |
|    |                       |                                                                 |          | [M+H] <sup>+</sup> | 284.0990     | 284.0989      | -0.1      | 6.48   | 135.0310, 152.0568, 153.04133, 110.0360         |                  |                      |       |
| 8  | Adenosine*            | C <sub>10</sub> H <sub>13</sub> O <sub>4</sub> N <sub>5</sub>   | 267.0968 | [M+H] <sup>+</sup> | 268.1040     | 268.1040      | -0.2      | 6.99   | 136.0621, 119.0358                              | Nucleoside       | No                   | 2     |
| 9  | Phenylalanine*        | C <sub>9</sub> H <sub>11</sub> O <sub>2</sub> N                 | 165.0790 | [M+H] <sup>+</sup> | 166.0863     | 166.0864      | 1.1       | 7.94   | 103.0556, 77.0415, 120.0820                     | Amino acid       | No                   | 2     |
| 10 | Protocatechuic acid*  | C <sub>7</sub> H <sub>6</sub> O <sub>4</sub>                    | 154.0266 | [M-H] <sup>-</sup> | 153.0193     | 153.0204      | 6.8       | 8.83   | 108.0221, 109.0308, 65.0131                     | Organic acid     | No                   | 2     |
| 11 | L-histidyl-L-proline  | C <sub>11</sub> H <sub>16</sub> O <sub>3</sub> N <sub>4</sub>   | 252.1222 | [M+H] <sup>+</sup> | 253.1295     | 253.1298      | 1.1       | 9.37   | 68.0518, 70.0687, 80.0518, 120.0814, 122.0963   | Amino acid       | No                   | 2     |
| 12 | Tryptophan            | C <sub>11</sub> H <sub>12</sub> O <sub>2</sub> N <sub>2</sub>   | 204.0899 | [M-H] <sup>-</sup> | 203.0826     | 203.0834      | 3.8       | 10.42  | 116.0506, 142.0656, 72.0139                     | Amino acid       | No                   | 2     |
|    |                       |                                                                 |          | [M+H] <sup>+</sup> | 205.0972     | 205.0974      | 1.0       | 10.47  | 91.0567, 115.0560, 130.0661, 143.0736, 141.0579 |                  |                      |       |
| 13 | Neochlorogenic acid*  | C <sub>16</sub> H <sub>18</sub> O <sub>9</sub>                  | 354.0951 | [M-H] <sup>-</sup> | 353.0878     | 353.0877      | -0.3      | 10.43  | 191.0549, 85.0303, 179.0347, 153.0452           | Phenylpropa noid | No                   | 3     |
| 14 | 4-Hydroxybenzoic acid | C <sub>7</sub> H <sub>6</sub> O <sub>3</sub>                    | 138.0317 | [M-H] <sup>-</sup> | 137.0244     | 137.0261      | 8.5       | 11.49  | 93.0348, 75.0244, 65.0406                       | Organic acid     | No                   | 4     |
| 15 | 5-Hydroxyferulic acid | C <sub>10</sub> H <sub>10</sub> O <sub>5</sub>                  | 210.0528 | [M-H] <sup>-</sup> | 209.0456     | 209.0463      | 3.6       | 11.59  | 119.0494, 93.0354                               | Phenylpropa noid | No                   | 2     |
| 16 | Hydroxy-              | C <sub>7</sub> H <sub>12</sub> O <sub>5</sub>                   | 176.0685 | [M-H] <sup>-</sup> | 175.0612     | 175.0622      | 5.5       | 12.02  | 115.0394                                        | Organic acid     | No                   | 2     |

|    |                                                    |                                                               |          |                           |          |          |      |       |                                                       |                      |     |   |
|----|----------------------------------------------------|---------------------------------------------------------------|----------|---------------------------|----------|----------|------|-------|-------------------------------------------------------|----------------------|-----|---|
| 17 | heptanedioic acid<br>Chlorogenic acid<br>glucoside | C <sub>22</sub> H <sub>28</sub> O <sub>14</sub>               | 516.1479 | [M-H] <sup>-</sup>        | 515.1406 | 515.1388 | 0.8  | 12.11 | 191.0558, 161.0238,<br>133.0291, 323.0779             | Phenylpropa<br>noid  | No  | 5 |
|    |                                                    |                                                               |          | [M+H] <sup>+</sup>        | 517.1552 | 517.1573 | 0.8  | 12.11 | 163.0393, 145.0293,<br>135.0454                       |                      |     |   |
| 18 | Ferulic acid<br>glucoside                          | C <sub>16</sub> H <sub>20</sub> O <sub>9</sub>                | 356.1107 | [M-H] <sup>-</sup>        | 355.1035 | 355.1028 | 0.3  | 12.54 | 134.0367, 149.0593,<br>178.0259                       | Phenylpropa<br>noid  | No  | 6 |
|    |                                                    |                                                               |          | [M+HCO<br>O] <sup>-</sup> | 401.1084 | 401.1078 | 1.5  | 12.54 | 134.0366, 149.0599,<br>178.0264                       |                      |     |   |
| 19 | Caffeic acid O-<br>Glucoside                       | C <sub>15</sub> H <sub>18</sub> O <sub>9</sub>                | 342.0951 | [M-H] <sup>-</sup>        | 341.0878 | 341.0878 | -0.1 | 12.66 | 179.0338, 135.0446,<br>134.0364                       | Phenylpropa<br>noid  | No  | 2 |
|    |                                                    |                                                               |          | [M-H] <sup>-</sup>        | 341.0878 | 341.0873 | -0.1 | 12.66 | 135.0446, 134.0364,<br>179.0338                       |                      |     |   |
| 20 | Dihydrophaseic<br>acid-O-glucoside                 | C <sub>21</sub> H <sub>32</sub> O <sub>10</sub>               | 444.1996 | [M-H] <sup>-</sup>        | 443.1923 | 443.1908 | 0.5  | 12.69 | 59.0168, 71.0152, 113.0245,<br>189.1273, 237.1480     | Sesquiterpen<br>e    | No  | 5 |
| 21 | Lycoperodine-1                                     | C <sub>12</sub> H <sub>12</sub> O <sub>2</sub> N <sub>2</sub> | 216.0899 | [M+H] <sup>+</sup>        | 217.0972 | 217.0972 | 0.2  | 12.94 | 144.0807, 143.0736,<br>130.0642, 117.0673             | Amino acid           | No  | 5 |
| 22 | Heliotropic acid                                   | C <sub>8</sub> H <sub>6</sub> O <sub>4</sub>                  | 166.0266 | [M-H] <sup>-</sup>        | 165.0193 | 165.0201 | 4.4  | 13.02 | 77.0379, 147.8875                                     | Organic acid         | No  | 7 |
| 23 | Adicardin                                          | C <sub>20</sub> H <sub>24</sub> O <sub>12</sub>               | 456.1268 | [M+H] <sup>+</sup>        | 457.1341 | 457.1343 | 0.5  | 13.07 | 163.0391, 136.0782                                    | Coumarin             | No  |   |
| 24 | Chlorogenic acid*                                  | C <sub>16</sub> H <sub>18</sub> O <sub>9</sub>                | 354.0951 | [M-H] <sup>-</sup>        | 353.0878 | 353.0882 | 1.0  | 13.19 | 191.0553, 127.0397,<br>85.0313                        | Phenylpropa<br>noid  | No  | 3 |
|    |                                                    |                                                               |          | [M+H] <sup>+</sup>        | 355.1024 | 355.1027 | 0.9  | 13.19 | 163.0397, 145.0295,<br>135.0453, 89.0417,<br>193.0499 |                      |     |   |
| 25 | Vanillic acid                                      | C <sub>8</sub> H <sub>8</sub> O <sub>4</sub>                  | 168.0423 | [M-H] <sup>-</sup>        | 167.0350 | 167.0358 | 5.1  | 13.65 | 77.0468                                               | Organic acid         | No  | 8 |
| 26 | Cryptochlorogenic<br>acid*                         | C <sub>16</sub> H <sub>18</sub> O <sub>9</sub>                | 354.0951 | [M-H] <sup>-</sup>        | 353.0878 | 353.0881 | 0.8  | 13.72 | 191.0550, 179.0337,<br>135.0442, 85.0302              | Phenylpropa<br>noid  | No  | 4 |
|    |                                                    |                                                               |          | [M+H] <sup>+</sup>        | 355.1024 | 355.1032 | 2.4  | 13.72 | 163.0391, 145.0290,<br>133.0288, 89.0419,<br>193.0498 |                      |     |   |
| 27 | Caffeic acid*                                      | C <sub>9</sub> H <sub>8</sub> O <sub>4</sub>                  | 180.0423 | [M-H] <sup>-</sup>        | 179.0350 | 179.0361 | 6.2  | 13.97 | 134.0375, 135.0448,<br>89.0413                        | Phenylpropa<br>noid  | Yes | 7 |
| 28 | Liquiritigenin-7,<br>4'-diglucoside                | C <sub>27</sub> H <sub>32</sub> O <sub>14</sub>               | 580.1792 | [M-H] <sup>-</sup>        | 579.1719 | 579.1724 | 0.9  | 15.01 | 255.0656, 135.0081,<br>119.0498, 91.0185,<br>417.1198 | Dihydroflavo<br>noid | No  | 8 |
| 29 | 3-p-<br>Coumaroylquinic<br>acid                    | C <sub>16</sub> H <sub>18</sub> O <sub>8</sub>                | 338.1002 | [M-H] <sup>-</sup>        | 337.0929 | 337.0932 | 0.8  | 15.89 | 191.0553, 119.0496                                    | Phenylpropa<br>noid  | No  | 4 |
| 30 | Vicenin-2                                          | C <sub>27</sub> H <sub>30</sub> O <sub>15</sub>               | 594.1585 | [M-H] <sup>-</sup>        | 593.1512 | 593.1512 | 0.2  | 16.76 | 353.0671, 383.0783,<br>203.0362, 503.1213             | Flavonoid            | No  | 1 |
|    |                                                    |                                                               |          | [M+H] <sup>+</sup>        | 595.1658 | 595.1659 | 0.3  | 16.76 | 409.0959, 457.1163,<br>307.0592, 295.0621             |                      |     |   |
| 31 | Angelitriol                                        | C <sub>15</sub> H <sub>18</sub> O <sub>6</sub>                | 294.1103 | [M+H] <sup>+</sup>        | 295.1176 | 295.1179 | 0.8  | 17.22 | 191.0344, 175.0393,<br>131.0501, 91.0566,             | Coumarin             | Yes | 9 |

|    |                                   |                                                 |          |                    |          |          |     |       |                                                                      | 205.0499          |     |    |
|----|-----------------------------------|-------------------------------------------------|----------|--------------------|----------|----------|-----|-------|----------------------------------------------------------------------|-------------------|-----|----|
| 32 | Trans-P-Hydroxycinnamic acid      | C <sub>9</sub> H <sub>8</sub> O <sub>3</sub>    | 164.0473 | [M-H] <sup>-</sup> | 163.0401 | 163.0415 | 8.7 | 17.70 | 119.0507, 117.0351, 116.0266, 93.0356                                | Phenylpropa noid  | No  | 10 |
| 33 | Methyl chlorogenate               | C <sub>17</sub> H <sub>20</sub> O <sub>9</sub>  | 368.1107 | [M-H] <sup>-</sup> | 367.1035 | 367.1037 | 0.7 | 17.78 | 191.0554, 193.0497, 134.0373, 93.0359                                | Phenylpropa noid  | Yes | 11 |
|    |                                   |                                                 |          | [M+H] <sup>+</sup> | 369.1180 | 369.1183 | 0.9 | 17.88 | 145.0296, 177.0553, 117.0350, 89.0413                                |                   |     |    |
| 34 | Schaftoside                       | C <sub>26</sub> H <sub>28</sub> O <sub>14</sub> | 564.1479 | [M-H] <sup>-</sup> | 563.1406 | 563.1408 | 0.3 | 19.79 | 353.0674, 383.0785, 443.0998, 473.1107, 297.0771                     | Flavonoid         | No  | 1  |
| 35 | Isoorientin*                      | C <sub>21</sub> H <sub>20</sub> O <sub>11</sub> | 448.1006 | [M-H] <sup>-</sup> | 447.0933 | 447.0934 | 0.3 | 19.84 | 327.0511, 357.0639, 297.0414, 298.0493, 285.0408, 133.0289           | Flavonoid         | No  | 4  |
|    |                                   |                                                 |          | [M+H] <sup>+</sup> | 449.1078 | 449.1084 | 0.6 | 19.84 | 299.0546, 329.0648, 325.0720, 311.0546, 283.0603, 165.0184           |                   |     |    |
| 36 | Orientin                          | C <sub>21</sub> H <sub>20</sub> O <sub>11</sub> | 448.1006 | [M-H] <sup>-</sup> | 447.0933 | 447.0935 | 0.3 | 20.23 | 327.0508, 357.0662, 297.0398, 285.0412, 133.0285                     | Flavonoid         | No  | 4  |
|    |                                   |                                                 |          | [M+H] <sup>+</sup> | 449.1078 | 449.1081 | 1.3 | 20.23 | 311.0547, 165.0179, 299.0542                                         |                   |     |    |
| 37 | Scopoletin/iso                    | C <sub>10</sub> H <sub>8</sub> O <sub>4</sub>   | 192.0423 | [M+H] <sup>+</sup> | 193.0495 | 193.0497 | 0.8 | 20.54 | 133.0285, 122.0365, 178.0235, 81.0380, 53.0430                       | Coumarin          | No  | 3  |
| 38 | Prim-O-Glucosylcimifugin *        | C <sub>22</sub> H <sub>28</sub> O <sub>11</sub> | 468.1632 | [M+H] <sup>+</sup> | 469.1704 | 469.1706 | 0.4 | 20.63 | 307.1174, 290.1149, 259.0599, 233.0447, 213.0552, 189.0550, 159.0445 | Chromone          | Yes | 12 |
| 39 | Ferulic acid*                     | C <sub>10</sub> H <sub>10</sub> O <sub>4</sub>  | 194.0579 | [M-H] <sup>-</sup> | 193.0506 | 193.0516 | 5.0 | 20.68 | 133.0291, 132.0211, 134.0376, 104.0265                               | Phenylpropa noid  | Yes | 10 |
|    |                                   |                                                 |          | [M+H] <sup>+</sup> | 195.0652 | 195.0653 | 0.6 | 20.82 | 89.0420, 78.0502, 134.0371                                           |                   |     |    |
| 40 | Agnuside                          | C <sub>22</sub> H <sub>26</sub> O <sub>11</sub> | 466.1475 | [M-H] <sup>-</sup> | 465.1402 | 465.1403 | 0.2 | 20.85 | 285.0770, 137.0241, 92.0274, 165.0548                                | Iridoid           | No  | 4  |
| 41 | Bisabolangelone                   | C <sub>15</sub> H <sub>20</sub> O <sub>3</sub>  | 248.1412 | [M+H] <sup>+</sup> | 249.1485 | 249.1487 | 0.7 | 20.90 | 123.0808, 128.0632, 131.0504, 91.0557, 159.0812                      | Sesquiterpen e    | No  | 9  |
| 42 | Heratomol-6-O-β-D-glucopyranoside | C <sub>17</sub> H <sub>16</sub> O <sub>9</sub>  | 364.0794 | [M+H] <sup>+</sup> | 365.0867 | 365.0873 | 1.6 | 21.37 | 203.0333, 147.0440, 131.0494, 91.0559                                | Coumarin          | No  | 3  |
| 43 | Neoliquiritin*                    | C <sub>21</sub> H <sub>22</sub> O <sub>9</sub>  | 418.1264 | [M-H] <sup>-</sup> | 417.1191 | 417.1191 | 0.0 | 21.84 | 119.0505, 135.0082, 91.0198, 255.0658                                | Dihydroflavo noid | No  | 2  |
|    |                                   |                                                 |          | [M+H] <sup>+</sup> | 419.1337 | 419.1347 | 2.5 | 21.84 | 137.0243, 147.0452, 119.0511, 257.0816                               |                   |     |    |
| 44 | Decuroside V                      | C <sub>20</sub> H <sub>24</sub> O <sub>10</sub> | 424.1370 | [M+H] <sup>+</sup> | 425.1442 | 425.1446 | 0.9 | 21.86 | 187.0395, 191.0330, 184.0532, 131.0495, 143.0498, 91.0608            | Coumarin          | No  | 13 |

|    |                                   |                                                 |          |                        |          |          |      |       |                                                                                     |                  |     |    |
|----|-----------------------------------|-------------------------------------------------|----------|------------------------|----------|----------|------|-------|-------------------------------------------------------------------------------------|------------------|-----|----|
| 45 | Psoralen/iso                      | C <sub>11</sub> H <sub>6</sub> O <sub>3</sub>   | 186.0317 | [M+H] <sup>+</sup>     | 187.0390 | 187.0394 | 2.3  | 21.88 | 131.0494, 115.0545, 53.0435, 89.0428                                                | Coumarin         | Yes | 13 |
| 46 | Liquiritin*                       | C <sub>21</sub> H <sub>22</sub> O <sub>9</sub>  | 418.1264 | [M-H] <sup>-</sup>     | 417.1191 | 417.1190 | -0.2 | 22.54 | 119.0500, 135.0081, 91.0200, 148.0157, 255.0650                                     | Dihydroflavonoid | Yes | 2  |
| 47 | Liquiritin apioside*              | C <sub>26</sub> H <sub>30</sub> O <sub>13</sub> | 550.1686 | [M+H] <sup>+</sup>     | 419.1337 | 419.1345 | 2.0  | 22.54 | 137.0248, 147.0451, 165.0721, 257.0816                                              | Dihydroflavonoid | Yes | 2  |
|    |                                   |                                                 |          | [M-H] <sup>-</sup>     | 549.1614 | 549.1619 | 0.9  | 23.08 | 255.0656, 135.0083, 119.0503, 91.0201                                               |                  |     |    |
| 48 | Columbianin                       | C <sub>26</sub> H <sub>34</sub> O <sub>14</sub> | 570.1949 | [M+H] <sup>+</sup>     | 571.2021 | 571.2027 | 0.9  | 23.08 | 137.0242, 165.0706, 81.0369                                                         | Coumarin         | No  | 9  |
|    |                                   |                                                 |          | [M+HCOO] <sup>-</sup>  | 453.1397 | 453.1401 | 0.9  | 24.12 | 227.0700, 211.0386                                                                  | Coumarin         | No  | 3  |
| 49 | Ammijin                           | C <sub>20</sub> H <sub>24</sub> O <sub>9</sub>  | 408.1420 | [M+H-glu] <sup>+</sup> | 247.0970 | 247.0970 | 0.0  | 24.12 | 91.0571, 147.0442, 175.0386, 213.0527, 229.0862                                     | Phthalide        | No  | 7  |
|    |                                   |                                                 |          | [M+H] <sup>+</sup>     | 209.1172 | 209.1174 | 1.0  | 24.13 | 53.0456, 65.0428, 79.0574, 77.0419, 91.0574, 107.0503, 115.0545, 128.0628, 153.0544 |                  |     |    |
| 50 | Senkyunolide G/K                  | C <sub>12</sub> H <sub>16</sub> O <sub>3</sub>  | 208.1099 | [M+H] <sup>+</sup>     | 209.1172 | 209.1174 | 1.0  | 24.13 | 259.0604, 221.0452, 177.0554, 187.0402, 161.0609, 91.0580                           | Chromone         | Yes | 12 |
| 51 | Cimifugin*                        | C <sub>16</sub> H <sub>18</sub> O <sub>6</sub>  | 306.1103 | [M+H] <sup>+</sup>     | 307.1176 | 307.1180 | 1.1  | 24.22 | 175.0386, 211.0392, 227.0701, 147.0445, 119.0501, 91.0570                           | Coumarin         | Yes | 2  |
| 52 | (+)-Peucedanol                    | C <sub>14</sub> H <sub>16</sub> O <sub>5</sub>  | 264.0998 | [M-H] <sup>-</sup>     | 263.0925 | 263.0926 | 0.5  | 24.24 |                                                                                     | Coumarin         | Yes | 2  |
| 53 | Nodakenin*                        | C <sub>20</sub> H <sub>24</sub> O <sub>9</sub>  | 408.1420 | [M+HCOO] <sup>-</sup>  | 453.1397 | 453.1399 | 0.4  | 24.36 | 227.0694, 211.0382                                                                  | Coumarin         | No  | 10 |
|    |                                   |                                                 |          | [M+H] <sup>+</sup>     | 409.1493 | 409.1502 | 2.2  | 24.36 | 187.0395, 175.0393, 131.0503, 143.0501, 229.0859, 247.0967                          |                  |     |    |
| 54 | Columbianetin-β-D-glucopyranoside | C <sub>20</sub> H <sub>24</sub> O <sub>9</sub>  | 408.1420 | [M+H] <sup>+</sup>     | 409.1493 | 409.1508 | 0.6  | 24.36 | 187.0395, 175.0393, 131.0503, 143.0501, 229.0859, 247.0967                          | Coumarin         | No  | 6  |
| 55 | Dicaffeoylquinic acid* 3,4-       | C <sub>25</sub> H <sub>24</sub> O <sub>12</sub> | 516.1268 | [M-H] <sup>-</sup>     | 515.1195 | 515.1190 | -1.0 | 24.37 | 191.0551, 173.0444, 135.0450, 161.0234                                              | Phenylpropanoid  | No  | 11 |
| 56 | Dicaffeoylquinic acid* 3,5-       | C <sub>25</sub> H <sub>24</sub> O <sub>12</sub> | 516.1268 | [M-H] <sup>-</sup>     | 515.1195 | 515.1194 | -0.2 | 24.55 | 191.0558                                                                            | Phenylpropanoid  | No  | 7  |
|    |                                   |                                                 |          | [M+H] <sup>+</sup>     | 517.1341 | 517.1345 | 0.9  | 24.55 | 163.0396, 145.0295                                                                  |                  |     |    |
| 57 | Columbianetin                     | C <sub>14</sub> H <sub>14</sub> O <sub>4</sub>  | 246.0892 | [M+H] <sup>+</sup>     | 247.0965 | 247.0967 | 0.9  | 24.80 | 147.0452, 175.0396, 91.0575                                                         | Coumarin         | Yes | 6  |

|    |                            |                                                 |          |                    |          |          |      |       |                                                                                                             |                  |     |    |
|----|----------------------------|-------------------------------------------------|----------|--------------------|----------|----------|------|-------|-------------------------------------------------------------------------------------------------------------|------------------|-----|----|
| 58 | 5-O-Methylvisammioside*    | C <sub>22</sub> H <sub>28</sub> O <sub>10</sub> | 452.1683 | [M+H] <sup>+</sup> | 453.1755 | 453.1751 | -0.9 | 24.84 | 243.0645, 241.0865, 216.0413, 217.0492, 205.0496, 291.1226                                                  | Chromone         | Yes | 14 |
| 59 | 6'-Acetyl glycyrrhizin     | C <sub>24</sub> H <sub>24</sub> O <sub>12</sub> | 504.1268 | [M-H] <sup>-</sup> | 503.1195 | 503.1195 | -0.1 | 24.88 | 135.0075, 119.0491, 91.0189, 255.0649                                                                       | Dihydroflavonoid | No  | 15 |
|    |                            |                                                 |          |                    | 505.1341 | 505.1346 | 1.0  | 24.91 | 137.0233, 147.0443, 217.0458, 244.0683, 292.1263                                                            |                  |     |    |
| 60 | 6''-O-Acetylquiritin       | C <sub>23</sub> H <sub>24</sub> O <sub>10</sub> | 460.1370 | [M-H] <sup>-</sup> | 459.1297 | 459.1301 | 0.9  | 24.89 | 135.0083, 119.0497, 91.0193, 148.0150                                                                       | Dihydroflavonoid | No  | 2  |
|    |                            |                                                 |          | [M+H] <sup>+</sup> | 461.1442 | 461.1439 | -0.7 | 24.89 | 137.0242, 147.0453, 257.0808, 279.0882                                                                      |                  |     |    |
| 61 | Azelaic acid               | C <sub>9</sub> H <sub>16</sub> O <sub>4</sub>   | 188.1049 | [M-H] <sup>-</sup> | 187.0976 | 187.0987 | 6.1  | 24.96 | 95.0571, 123.0791                                                                                           | Organic acid     | No  | 2  |
| 62 | Diosmin                    | C <sub>28</sub> H <sub>32</sub> O <sub>15</sub> | 608.1741 | [M+H] <sup>+</sup> | 609.1814 | 609.1820 | 1.0  | 24.96 | 301.0705, 286.0478, 258.0527                                                                                | Flavonoid        | No  | 3  |
| 63 | 4,5-Dicaffeoylquinic acid* | C <sub>25</sub> H <sub>24</sub> O <sub>12</sub> | 516.1268 | [M-H] <sup>-</sup> | 515.1195 | 515.1187 | -1.5 | 25.00 | 191.0557, 173.0454, 179.0350, 135.0455                                                                      | Phenylpropanoid  | No  | 11 |
| 64 | Klysimplexin I             | C <sub>40</sub> H <sub>70</sub> O <sub>8</sub>  | 678.5071 | [M+H] <sup>+</sup> | 679.5144 | 679.5143 | -0.1 | 25.07 | 301.0703, 308.1233, 286.0471, 258.0524, 209.1635, 661.5085, 227.0708, 211.0395, 59.0175, 152.0096, 255.0687 | Diterpene ester  | No  | 11 |
| 65 | 10-O-Vanilloylaucubin      | C <sub>23</sub> H <sub>28</sub> O <sub>12</sub> | 496.1581 | [M-H] <sup>-</sup> | 495.1508 | 495.1508 | 0.0  | 25.20 | 135.0086, 119.0502, 255.0663, 91.0197, 148.0160                                                             | Iridoid          | Yes | 4  |
| 66 | Isoliquiritin apioside*    | C <sub>26</sub> H <sub>30</sub> O <sub>13</sub> | 550.1686 | [M-H] <sup>-</sup> | 549.1614 | 549.1616 | 0.4  | 25.36 | 137.0240, 147.0449, 239.0700, 257.0808                                                                      | Chalcone         | Yes | 2  |
|    |                            |                                                 |          | [M+H] <sup>+</sup> | 551.1759 | 551.1756 | -0.6 | 25.36 | 267.0661, 252.0427, 195.0439                                                                                |                  |     |    |
| 67 | Glycyroside                | C <sub>27</sub> H <sub>30</sub> O <sub>13</sub> | 562.1686 | [M-H] <sup>-</sup> | 561.1614 | 561.1615 | 0.2  | 25.49 | 269.0808, 254.0571, 213.0911                                                                                | Isoflavonoid     | No  | 2  |
|    |                            |                                                 |          | [M+H] <sup>+</sup> | 563.1759 | 563.1759 | 0.0  | 25.49 |                                                                                                             |                  |     |    |
| 68 | Senkyunolide F/iso         | C <sub>12</sub> H <sub>14</sub> O <sub>3</sub>  | 206.0943 | [M+H] <sup>+</sup> | 207.1016 | 207.1019 | 1.5  | 25.54 | 91.0574, 79.0579, 115.0556, 131.0503                                                                        | Phthalide        | Yes | 16 |
| 69 | Isoliquiritin*             | C <sub>21</sub> H <sub>22</sub> O <sub>9</sub>  | 418.1264 | [M-H] <sup>-</sup> | 417.1191 | 417.1198 | 1.7  | 25.61 | 148.0166, 135.0089, 119.506, 255.0664                                                                       | Chalcone         | Yes | 2  |
|    |                            |                                                 |          | [M+H] <sup>+</sup> | 419.1337 | 419.1340 | 0.9  | 25.62 | 137.0248, 147.0454, 211.0758, 257.0813, 119.0514                                                            |                  |     |    |
| 70 | 4-Methoxycinnamic acid     | C <sub>10</sub> H <sub>10</sub> O <sub>3</sub>  | 178.0630 | [M+H] <sup>+</sup> | 179.0703 | 179.0709 | 3.5  | 25.61 | 65.0424, 91.0586, 147.0447                                                                                  | Phenylpropanoid  | No  | 4  |
| 71 | Ononin*                    | C <sub>22</sub> H <sub>22</sub> O <sub>9</sub>  | 430.1264 | [M+H] <sup>+</sup> | 431.1337 | 431.1340 | 0.8  | 25.76 | 269.0811, 253.0503, 213.0917, 181.0653                                                                      | Isoflavonoid     | No  | 17 |



|    |                               |                                                 |           |                    |           |           |      |       |                                                                                          |                    |     |    |
|----|-------------------------------|-------------------------------------------------|-----------|--------------------|-----------|-----------|------|-------|------------------------------------------------------------------------------------------|--------------------|-----|----|
| 72 | Ulopterol                     | C <sub>15</sub> H <sub>18</sub> O <sub>5</sub>  | 278.1154  | [M+H] <sup>+</sup> | 279.1227  | 279.1232  | 1.9  | 26.02 | 161.0604, 177.0548, 203.0704, 131.0503, 105.0713                                         | Coumarin           | No  | 9  |
| 73 | Liquiritigenin*               | C <sub>15</sub> H <sub>12</sub> O <sub>4</sub>  | 256.0736  | [M-H] <sup>-</sup> | 255.0663  | 255.0671  | 3.0  | 26.23 | 119.0509, 91.0202                                                                        | Dihydroflavonoid   | Yes | 2  |
| 74 | 24-Hydroxy-licoricesaponin A3 | C <sub>48</sub> H <sub>72</sub> O <sub>22</sub> | 1000.4515 | [M+H] <sup>+</sup> | 257.0808  | 257.0812  | 1.4  | 26.23 | 137.0242, 147.0453, 91.0567, 81.0368                                                     | Triterpene saponin | No  | 2  |
|    |                               |                                                 |           | [M-H] <sup>-</sup> | 999.4443  | 999.4444  | 0.4  | 26.38 | 8377.4054, 351.0582, 193.0354                                                            |                    |     |    |
| 75 | Khellinquinone                | C <sub>12</sub> H <sub>6</sub> O <sub>5</sub>   | 230.0215  | [M+H] <sup>+</sup> | 1001.4588 | 1001.4597 | 0.9  | 26.39 | 469.3300, 487.3404, 451.3184, 217.0492, 205.0492, 631.3810, 649.3952, 825.4259           | Anthraquinone      | Yes | 18 |
|    |                               |                                                 |           | [M-H] <sup>-</sup> | 231.0288  | 231.0288  | -1.3 | 26.39 | 188.0117, 160.0178, 132.0213                                                             |                    |     |    |
| 76 | Bergaptol                     | C <sub>11</sub> H <sub>6</sub> O <sub>4</sub>   | 202.0266  | [M-H] <sup>-</sup> | 201.0193  | 201.0206  | 6.1  | 26.40 | 117.0354, 145.0300, 173.0239, 65.0058                                                    | Coumarin           | Yes | 13 |
| 77 | 5-O-Methylvisamminol          | C <sub>16</sub> H <sub>18</sub> O <sub>5</sub>  | 290.1154  | [M+H] <sup>+</sup> | 291.1227  | 291.1232  | 1.6  | 26.50 | 243.0656, 205.0498, 203.0347, 161.0603                                                   | Chromone           | Yes | 12 |
| 78 | Formononetin                  | C <sub>16</sub> H <sub>12</sub> O <sub>4</sub>  | 268.0736  | [M-H] <sup>-</sup> | 267.0663  | 267.0671  | 3.0  | 26.51 | 195.0447, 223.0401, 167.0496, 251.0359, 252.0438                                         | Isoflavonoid       | No  | 2  |
| 79 | Sec-O-Glucosylhamaudol*       | C <sub>21</sub> H <sub>26</sub> O <sub>10</sub> | 438.1526  | [M+H] <sup>+</sup> | 439.1599  | 439.1599  | 0.1  | 26.55 | 205.0499, 259.0970, 277.1077, 217.0498, 189.0551, 177.0550                               | Chromone           | Yes | 14 |
| 80 | 6'-O-Trans-feruloylnodakenin  | C <sub>30</sub> H <sub>32</sub> O <sub>12</sub> | 584.1894  | [M-H] <sup>-</sup> | 583.1821  | 583.1837  | 2.7  | 26.72 | 175.0394, 160.0155, 193.0498, 211.0389, 227.0703, 235.0605                               | Coumarin           | No  | 3  |
| 81 | Oxypeucedanin hydrate         | C <sub>16</sub> H <sub>16</sub> O <sub>6</sub>  | 304.0947  | [M+H] <sup>+</sup> | 305.1020  | 305.1022  | 0.7  | 26.73 | 147.0449, 203.0340, 131.0502                                                             | Coumarin           | Yes | 13 |
| 82 | Uralsaponin F                 | C <sub>44</sub> H <sub>64</sub> O <sub>19</sub> | 896.4042  | [M-H] <sup>-</sup> | 895.3969  | 895.3988  | 2.1  | 26.76 | 351.0580, 193.0352, 113.0242                                                             | Triterpene saponin | No  | 12 |
|    |                               |                                                 |           | [M+H] <sup>+</sup> | 897.4115  | 897.4117  | 0.3  | 26.76 | 527.3357, 545.3468, 509.3246, 467.3154, 821.4083, 803.3977, 645.3701, 351.0578, 193.0349 |                    |     |    |
| 83 | Licoricesaponin A3            | C <sub>48</sub> H <sub>72</sub> O <sub>21</sub> | 984.4566  | [M-H] <sup>-</sup> | 983.4493  | 983.4523  | 3.0  | 26.84 | 453.3356, 471.3465, 615.3886                                                             | Triterpene saponin | No  | 12 |
|    |                               |                                                 |           | [M+H] <sup>+</sup> | 985.4639  | 985.4631  | -0.8 | 26.85 | 485.3260, 503.3353, 467.3152                                                             |                    |     |    |
| 84 | 22-Hydroxy-licoricesaponin G2 | C <sub>42</sub> H <sub>62</sub> O <sub>18</sub> | 854.3936  | [M+H] <sup>+</sup> | 855.4009  | 855.4065  | 0.4  | 26.87 | 163.0397, 107.0503, 175.0383, 79.0638                                                    | Triterpene saponin | No  | 15 |
| 85 | 5-Hydroxyaurapten             | C <sub>19</sub> H <sub>22</sub> O <sub>4</sub>  | 314.1518  | [M+H] <sup>+</sup> | 315.1591  | 315.1597  | 1.0  | 27.01 |                                                                                          | Coumarin           | No  | 3  |

| e   |                                                     |                                                 |           |                    |           |           |      |       |                                                            |                      |     |    |
|-----|-----------------------------------------------------|-------------------------------------------------|-----------|--------------------|-----------|-----------|------|-------|------------------------------------------------------------|----------------------|-----|----|
| 86  | Uralsaponin X                                       | C <sub>50</sub> H <sub>74</sub> O <sub>22</sub> | 1026.4672 | [M-H] <sup>-</sup> | 1025.4599 | 1025.4636 | 3.6  | 27.02 | 497.1175, 321.0821                                         | Triterpene saponin   | No  | 2  |
| 87  | Rubranoside A                                       | C <sub>25</sub> H <sub>34</sub> O <sub>10</sub> | 494.2152  | [M+H] <sup>+</sup> | 495.2225  | 495.2224  | -0.1 | 27.02 | 163.0394, 153.1275, 175.0393, 135.1177, 107.0872           | Polyphenol glycoside | No  | 11 |
| 88  | Persicogenin                                        | C <sub>17</sub> H <sub>16</sub> O <sub>6</sub>  | 316.0947  | [M+H] <sup>+</sup> | 317.1020  | 317.1019  | -0.4 | 27.03 | 163.0397, 175.0383, 107.0503, 79.0638, 200.0499, 297.1481  | Dihydroflavonoid     | No  | 13 |
| 89  | 22β-Acetoxyglycyrrhizin                             | C <sub>44</sub> H <sub>64</sub> O <sub>18</sub> | 880.4093  | [M-H] <sup>-</sup> | 879.4020  | 879.4046  | 3.0  | 27.46 | 351.0585, 193.0350, 175.0242, 113.0248                     | Triterpene saponin   | No  | 2  |
| 90  | Psoralen/iso                                        | C <sub>11</sub> H <sub>6</sub> O <sub>3</sub>   | 186.0317  | [M+H] <sup>+</sup> | 187.0390  | 187.0395  | 2.8  | 27.78 | 131.0502, 115.0558, 77.0427, 53.0449                       | Coumarin             | Yes | 18 |
| 91  | 3-Butylidenephthalide                               | C <sub>12</sub> H <sub>12</sub> O <sub>2</sub>  | 188.0837  | [M+H] <sup>+</sup> | 189.0910  | 189.0913  | 1.5  | 27.85 | 128.0630, 115.0556, 91.0571, 141.0717                      | Phthalide            | No  | 16 |
| 92  | 24-Hydroxyl-licoricesaponin E2                      | C <sub>42</sub> H <sub>60</sub> O <sub>17</sub> | 836.3831  | [M-H] <sup>-</sup> | 835.3758  | 835.3764  | 2.8  | 27.85 | 351.0571, 269.0814, 193.0347, 113.0232                     | Triterpene saponin   | No  | 2  |
| 93  | Bergapten or iso                                    | C <sub>12</sub> H <sub>8</sub> O <sub>4</sub>   | 216.0423  | [M+H] <sup>+</sup> | 217.0495  | 217.0498  | 1.0  | 28.50 | 89.0417, 90.0487, 174.0315, 161.0600                       | Coumarin             | No  | 12 |
| 94  | Licoricesaponine E2/iso                             | C <sub>42</sub> H <sub>60</sub> O <sub>16</sub> | 820.3881  | [M-H] <sup>-</sup> | 819.3809  | 819.3844  | 4.3  | 29.00 | 351.0571, 193.0338, 175.0235                               | Triterpene saponin   | No  | 2  |
| 95  | Licoricesaponin G2                                  | C <sub>42</sub> H <sub>62</sub> O <sub>17</sub> | 838.3987  | [M-H] <sup>-</sup> | 837.3914  | 837.3946  | 3.8  | 29.06 | 351.0578, 661.3670, 289.0562, 193.0346, 175.0241, 113.0248 | Triterpene saponin   | No  | 2  |
| 96  | Isoliquiritigenin*                                  | C <sub>15</sub> H <sub>12</sub> O <sub>4</sub>  | 256.0736  | [M-H] <sup>-</sup> | 255.0663  | 255.0668  | 2.0  | 29.20 | 119.0504, 91.0194                                          | Chalcone             | Yes | 2  |
|     |                                                     |                                                 |           | [M+H] <sup>+</sup> | 257.0808  | 257.0810  | 0.6  | 29.20 | 137.0244, 165.0403, 81.0368, 91.0569                       |                      |     |    |
| 97  | Angelol A/ D/ K / G                                 | C <sub>20</sub> H <sub>24</sub> O <sub>7</sub>  | 376.1522  | [M-H] <sup>-</sup> | 375.1449  | 375.1452  | 0.8  | 29.25 | 99.0453, 161.0239, 189.0174, 227.0692, 255.0624            | Coumarin             | No  | 13 |
|     |                                                     |                                                 |           | [M+H] <sup>+</sup> | 377.1595  | 377.1593  | -0.6 | 29.27 | 191.0337, 160.0526, 131.0507, 205.0497                     |                      |     |    |
| 98  | Cnidilin                                            | C <sub>17</sub> H <sub>16</sub> O <sub>5</sub>  | 300.0998  | [M+H] <sup>+</sup> | 301.1071  | 301.1073  | 0.8  | 29.27 | 131.0499, 55.0605, 83.0515, 187.0400, 219.0671             | Coumarin             | No  | 13 |
| 99  | Scoparone                                           | C <sub>11</sub> H <sub>10</sub> O <sub>4</sub>  | 206.0579  | [M+H] <sup>+</sup> | 207.0652  | 207.0651  | -0.5 | 29.40 | 149.0240, 91.0569, 164.0466, 163.0400, 191.0345            | Coumarin             | No  | 9  |
| 100 | 3-Butyl-4-hydroxyphthalin/3-Butyl-5-hydroxyphthalin | C <sub>12</sub> H <sub>14</sub> O <sub>3</sub>  | 206.0943  | [M-H] <sup>-</sup> | 205.0870  | 205.0879  | 4.3  | 29.45 | 92.0266, 130.0432, 161.0986                                | Phthalide            | No  | 8  |

|     |                                                                                 |                                                 |          |                    |          |          |      |       |                                                                 |                       |     |    |
|-----|---------------------------------------------------------------------------------|-------------------------------------------------|----------|--------------------|----------|----------|------|-------|-----------------------------------------------------------------|-----------------------|-----|----|
| 101 | Angelol L/C/iso                                                                 | C <sub>20</sub> H <sub>26</sub> O <sub>7</sub>  | 378.1679 | [M-H] <sup>-</sup> | 377.1606 | 377.1607 | 0.2  | 29.63 | 101.0606, 157.0289,<br>257.0821                                 | Coumarin              | Yes | 13 |
| 102 | Phellopterin                                                                    | C <sub>17</sub> H <sub>16</sub> O <sub>5</sub>  | 300.0998 | [M+H] <sup>+</sup> | 301.1071 | 301.1074 | 0.8  | 29.78 | 131.0497, 55.0605, 83.0533,<br>187.0393, 219.0640,<br>217.0479  | Coumarin              | No  | 11 |
| 103 | 3'-O-<br>Angeloylhamaudo<br>                                                    | C <sub>20</sub> H <sub>22</sub> O <sub>6</sub>  | 358.1416 | [M+H] <sup>+</sup> | 359.1489 | 359.1490 | 0.1  | 29.78 | 187.0394, 131.0504,<br>55.0609, 83.0527, 219.0651,<br>273.1107  | Chromone              | No  | 9  |
| 104 | 6,7-<br>Epoxygustilide                                                          | C <sub>12</sub> H <sub>14</sub> O <sub>3</sub>  | 206.0943 | [M-H] <sup>-</sup> | 205.0870 | 205.0881 | 5.3  | 29.89 | 130.0426, 161.0989,<br>81.0356                                  | Phthalide             | No  | 7  |
| 105 | Bergapten or iso                                                                | C <sub>12</sub> H <sub>8</sub> O <sub>4</sub>   | 216.0423 | [M+H] <sup>+</sup> | 217.0495 | 217.0497 | 1.0  | 29.95 | 89.0420, 174.0321, 90.0497,<br>118.0429                         | Coumarin              | No  | 14 |
| 106 | Pimpinellin                                                                     | C <sub>13</sub> H <sub>10</sub> O <sub>5</sub>  | 246.0528 | [M+H] <sup>+</sup> | 247.0601 | 247.0603 | 0.7  | 30.16 | 217.0127, 189.0179,<br>133.0288, 95.0150                        | Coumarin              | No  | 12 |
| 107 | Senkyunolide G/K                                                                | C <sub>12</sub> H <sub>16</sub> O <sub>3</sub>  | 208.1099 | [M-H] <sup>-</sup> | 207.1027 | 207.1038 | 5.6  | 30.21 | 83.0505, 107.0576,<br>161.0987                                  | Phthalide             | No  | 7  |
| 108 | Angelol L/C/iso                                                                 | C <sub>20</sub> H <sub>26</sub> O <sub>7</sub>  | 378.1679 | [M+H] <sup>+</sup> | 379.1751 | 379.1748 | -0.9 | 30.40 | 191.0340, 205.0492,<br>259.0956, 175.0391,<br>131.0503, 91.0572 | Coumarin              | Yes | 13 |
| 109 | Columbianetin<br>propionate                                                     | C <sub>17</sub> H <sub>18</sub> O <sub>5</sub>  | 302.1154 | [M+H] <sup>+</sup> | 303.1227 | 303.1227 | 0.1  | 30.41 | 131.0503, 187.0390,<br>219.0658, 135.0812,<br>57.0763           | Coumarin              | No  | 9  |
| 110 | Glycyrrhizic acid*                                                              | C <sub>42</sub> H <sub>62</sub> O <sub>16</sub> | 822.4038 | [M-H] <sup>-</sup> | 821.3965 | 821.3982 | 2.1  | 30.47 | 351.0575, 645.3729,<br>289.0569, 193.0351,<br>113.0255          | Triterpene<br>saponin | Yes | 2  |
|     |                                                                                 |                                                 |          | [M+H] <sup>+</sup> | 823.4111 | 823.4089 | -2.6 | 30.50 | 453.3349, 435.3246,<br>471.3454                                 |                       |     |    |
| 111 | Melliferone                                                                     | C <sub>30</sub> H <sub>44</sub> O <sub>3</sub>  | 452.3291 | [M+H] <sup>+</sup> | 453.3363 | 453.3356 | -1.5 | 30.51 | 107.0879, 189.1644,<br>217.1589, 241.1954,<br>389.3209          | Triterpene            | No  | 17 |
| 112 | Senkyunolide F                                                                  | C <sub>12</sub> H <sub>14</sub> O <sub>3</sub>  | 206.0943 | [M-H] <sup>-</sup> | 205.0870 | 205.0879 | 4.5  | 30.78 | 131.0508, 130.0424,<br>161.0992, 106.0422,<br>65.0087           | Phthalide             | No  | 16 |
| 113 | 7-O-Isoprene-<br>umbellifolactone                                               | C <sub>14</sub> H <sub>14</sub> O <sub>3</sub>  | 230.0943 | [M-H] <sup>-</sup> | 229.0870 | 229.0871 | 3.2  | 31.15 | 145.0293, 173.0234,<br>174.0318, 117.0352                       | Coumarin              | No  | 3  |
| 114 | 4-Hydroxy-3-<br>butylidenephthali<br>de/5-Hydroxy-3-<br>butylidenephthali<br>de | C <sub>12</sub> H <sub>12</sub> O <sub>3</sub>  | 204.0786 | [M-H] <sup>-</sup> | 203.0714 | 203.0723 | 4.6  | 31.33 | 145.0286, 173.0241                                              | Phthalide             | No  | 16 |
| 115 | 4-Hydroxy-3-<br>butylidenephthali<br>de/5-Hydroxy-3-<br>butylidenephthali<br>de | C <sub>12</sub> H <sub>12</sub> O <sub>3</sub>  | 204.0786 | [M-H] <sup>-</sup> | 203.0714 | 203.0730 | 8.0  | 32.35 | 145.0299, 173.0243,<br>117.0371, 92.0292                        | Phthalide             | No  | 16 |

|     |                                        |                                                 |          |                    |          |          |      |       |                                                                  |                       |     |    |
|-----|----------------------------------------|-------------------------------------------------|----------|--------------------|----------|----------|------|-------|------------------------------------------------------------------|-----------------------|-----|----|
| 116 | Uralsaponin<br>C/Licoricesaponin<br>J2 | C <sub>42</sub> H <sub>64</sub> O <sub>16</sub> | 824.4194 | [M-H] <sup>-</sup> | 823.4122 | 823.4148 | 3.2  | 31.69 | 351.0567, 193.0342,<br>113.0234                                  | Triterpene<br>saponin | No  | 2  |
| 117 | Uralsaponin<br>C/Licoricesaponin<br>J2 | C <sub>42</sub> H <sub>64</sub> O <sub>16</sub> | 824.4194 | [M-H] <sup>-</sup> | 823.4122 | 823.4041 | -9.8 | 32.30 | 351.0583, 193.0354,<br>175.0253                                  | Triterpene<br>saponin | No  | 2  |
| 118 | Uralsaponin<br>C/Licoricesaponin<br>J2 | C <sub>42</sub> H <sub>64</sub> O <sub>16</sub> | 824.4194 | [M-H] <sup>-</sup> | 823.4122 | 823.4147 | 3.1  | 33.83 | 351.0574, 193.0351,<br>113.0253                                  | Triterpene<br>saponin | No  | 2  |
| 119 | Licoricesaponin<br>B2/iso              | C <sub>42</sub> H <sub>64</sub> O <sub>15</sub> | 808.4245 | [M-H] <sup>-</sup> | 807.4173 | 807.4195 | 2.8  | 31.96 | 351.0579, 193.0345,<br>113.0242                                  | Triterpene<br>saponin | No  | 2  |
| 120 | Licoricesaponin<br>K2/H2               | C <sub>42</sub> H <sub>62</sub> O <sub>16</sub> | 822.4038 | [M-H] <sup>-</sup> | 821.3965 | 821.4011 | 5.6  | 32.30 | 351.0580, 645.3728,<br>193.0353, 113.0255                        | Triterpene<br>saponin | No  | 2  |
|     |                                        |                                                 |          | [M+H] <sup>+</sup> | 823.4111 | 823.4082 | -3.5 | 32.30 | 453.3373, 435.3242,<br>471.3459                                  |                       |     |    |
| 121 | 4-Phenyl-2-<br>butanone                | C <sub>10</sub> H <sub>12</sub> O               | 148.0888 | [M+H] <sup>+</sup> | 149.0961 | 149.0970 | 5.9  | 32.51 | 91.0570, 79.0578, 115.0562,<br>105.0716                          | Aromatic<br>ketone    | No  | 2  |
| 122 | Thymylisobutyrate                      | C <sub>14</sub> H <sub>20</sub> O <sub>2</sub>  | 220.1463 | [M+H] <sup>+</sup> | 221.1536 | 221.1536 | 0.2  | 32.51 | 53.0553, 128.0647                                                | Monoterpen<br>e       | No  | 4  |
| 123 | Licoricesaponin<br>K2/H2               | C <sub>42</sub> H <sub>62</sub> O <sub>16</sub> | 822.4038 | [M-H] <sup>-</sup> | 821.3965 | 821.3990 | 3.0  | 33.09 | 351.0578, 193.0346,<br>113.0245                                  | Triterpene<br>saponin | No  | 2  |
|     |                                        |                                                 |          | [M+H] <sup>+</sup> | 823.4111 | 823.4084 | -3.2 | 33.09 | 453.3367, 435.3263,<br>141.0197                                  |                       |     |    |
| 124 | Casticin*                              | C <sub>19</sub> H <sub>18</sub> O <sub>8</sub>  | 374.1002 | [M+H] <sup>+</sup> | 375.1074 | 375.1075 | 0.2  | 33.29 | 299.0551, 317.0659,<br>359.0759, 256.0366,<br>228.0422           | Flavonol              | No  | 4  |
| 125 | Columbianetin<br>acetate               | C <sub>16</sub> H <sub>16</sub> O <sub>5</sub>  | 288.0998 | [M+H] <sup>+</sup> | 289.1071 | 289.1068 | -0.7 | 33.30 | 131.0503, 187.0391,<br>91.0570                                   | Coumarin              | No  | 9  |
| 126 | Isoangenomalin                         | C <sub>14</sub> H <sub>12</sub> O <sub>3</sub>  | 228.0786 | [M+H] <sup>+</sup> | 229.0859 | 229.0862 | 1.4  | 33.30 | 131.0497, 129.0708,<br>128.0637, 187.0383,<br>53.0495, 213.0519  | Coumarin              | No  | 9  |
| 127 | Psoralen/iso                           | C <sub>11</sub> H <sub>6</sub> O <sub>3</sub>   | 186.0317 | [M+H] <sup>+</sup> | 187.0390 | 187.0395 | 2.8  | 33.31 | 131.0504, 115.0553,<br>51.0285, 53.0515                          | Coumarin              | Yes | 18 |
| 128 | 7-Hydroxy-3-<br>butylidene-phthalide   | C <sub>12</sub> H <sub>12</sub> O <sub>3</sub>  | 204.0786 | [M-H] <sup>-</sup> | 203.0714 | 203.0718 | 5.3  | 33.86 | 143.0482, 174.0928,<br>117.0420                                  | Phthalide             | No  | 16 |
| 129 | Phenylacetaldehyde                     | C <sub>8</sub> H <sub>8</sub> O                 | 120.0575 | [M+H] <sup>+</sup> | 121.0648 | 121.0662 | 8.9  | 34.73 | 51.0296, 51.0441, 50.0345                                        | Aromatic<br>aldehyde  | No  | 2  |
| 130 | 7-O-<br>Prenylscopoletin               | C <sub>15</sub> H <sub>16</sub> O <sub>4</sub>  | 260.1049 | [M-H] <sup>-</sup> | 259.0976 | 259.0982 | 2.2  | 34.75 | 201.0181, 189.0167,<br>228.0402, 145.0293,<br>117.0348, 129.0359 | Coumarin              | No  | 13 |
| 131 | Licoricesaponin<br>C2                  | C <sub>42</sub> H <sub>62</sub> O <sub>15</sub> | 806.4089 | [M+H] <sup>+</sup> | 805.4016 | 805.4035 | 2.4  | 35.10 | 351.0575, 193.0348,<br>113.0241                                  | Triterpene<br>saponin | No  | 2  |

|     |                                       |                                                |          |                                     |          |          |      |       |                                                                      |                 |     |    |
|-----|---------------------------------------|------------------------------------------------|----------|-------------------------------------|----------|----------|------|-------|----------------------------------------------------------------------|-----------------|-----|----|
| 132 | 24-Phenylchol-5-ene-3, 24-diol        | C <sub>30</sub> H <sub>44</sub> O <sub>2</sub> | 436.3341 | [M+H] <sup>+</sup>                  | 437.3414 | 437.3411 | -0.7 | 35.12 | 147.1165, 135.0448, 133.1018, 153.0553, 159.1174, 259.1750, 285.1841 | Triterpene      | No  | 17 |
| 133 | Senkyunolide A                        | C <sub>12</sub> H <sub>16</sub> O <sub>2</sub> | 192.1150 | [M+H] <sup>+</sup>                  | 193.1223 | 193.1226 | 1.7  | 35.54 | 91.0581, 77.0431, 79.0585, 115.0560                                  | Phthalide       | No  | 17 |
| 134 | Imperatorin                           | C <sub>16</sub> H <sub>14</sub> O <sub>4</sub> | 270.0892 | [M-H] <sup>-</sup>                  | 269.0819 | 269.0825 | 2.0  | 35.63 | 225.0556, 253.0509, 254.0583, 209.0605, 197.0606, 183.0448           | Coumarin        | Yes | 14 |
|     |                                       |                                                |          | [M+H] <sup>+</sup>                  | 271.0965 | 271.0967 | 0.6  | 35.70 | 131.0503, 91.0565, 145.0657                                          |                 |     |    |
| 135 | Isolicoflavonol                       | C <sub>20</sub> H <sub>18</sub> O <sub>6</sub> | 354.1103 | [M-H] <sup>-</sup>                  | 353.1031 | 353.1033 | 0.6  | 37.60 | 125.0239, 57.0383, 199.0392, 216.0414, 201.0910, 228.0777, 284.0317  | Flavonol        | No  | 1  |
| 136 | 3'-O-Acetylhamaudol                   | C <sub>17</sub> H <sub>18</sub> O <sub>6</sub> | 318.1103 | [M+H] <sup>+</sup>                  | 319.1176 | 319.1177 | 0.2  | 39.07 | 205.0492, 217.0496, 189.0549, 149.0230, 128.0639, 243.0659           | Chromone        | No  | 14 |
| 137 | Notoptol                              | C <sub>21</sub> H <sub>22</sub> O <sub>5</sub> | 354.1467 | [M+Na] <sup>+</sup>                 | 377.1359 | 377.1358 | -0.4 | 39.65 | 147.0450, 203.0341, 239.0343, 91.0573                                | Coumarin        | No  | 3  |
|     |                                       |                                                |          | [M+H-H <sub>2</sub> O] <sup>+</sup> | 337.1434 | 337.1439 | 1.4  | 39.65 | 147.0446, 203.0335, 211.0395                                         |                 |     |    |
| 138 | Notopterol*                           | C <sub>21</sub> H <sub>22</sub> O <sub>5</sub> | 354.1467 | [M+H-H <sub>2</sub> O] <sup>+</sup> | 337.1434 | 337.1432 | -0.7 | 39.97 | 147.0453, 203.0349, 91.0576                                          | Coumarin        | Yes | 11 |
| 139 | Cnidilide                             | C <sub>12</sub> H <sub>18</sub> O <sub>2</sub> | 194.1307 | [M+H] <sup>+</sup>                  | 195.1380 | 195.1382 | 1.0  | 39.83 | 79.0577, 77.0425, 93.0713                                            | Phthalide       | No  | 19 |
| 140 | Bergaptol                             | C <sub>11</sub> H <sub>6</sub> O <sub>4</sub>  | 202.0266 | [M+H] <sup>+</sup>                  | 203.0339 | 203.0342 | 1.6  | 39.95 | 91.0577, 65.0440, 119.0511, 131.0509, 147.0452                       | Coumarin        | Yes | 3  |
| 141 | Phenethylferulate                     | C <sub>18</sub> H <sub>18</sub> O <sub>4</sub> | 298.1205 | [M-H] <sup>-</sup>                  | 297.1132 | 297.1137 | 1.5  | 39.97 | 133.0293, 132.0212, 160.0154, 77.0410, 105.0353, 282.0889            | Phenylpropenoid | No  | 11 |
|     |                                       |                                                |          |                                     |          |          |      |       | 115.0562, 91.0571, 128.0636, 129.0713, 117.0712                      | Phthalide       | No  | 8  |
| 143 | Umbelliferone-7-O-β-D-glucopyranoside | C <sub>15</sub> H <sub>16</sub> O <sub>8</sub> | 324.0845 | [M+H] <sup>+</sup>                  | 325.0918 | 325.0930 | 1.4  | 40.04 | 123.0450, 128.0627, 147.0424, 69.0055                                | Coumarin        | No  | 5  |
| 144 | Octadecanedioic acid                  | C <sub>18</sub> H <sub>34</sub> O <sub>4</sub> | 314.2457 | [M-H] <sup>-</sup>                  | 313.2384 | 313.2387 | 0.8  | 40.10 | 127.1103, 137.0967, 171.1026, 201.1130, 199.0977, 277.2147           | Organic acid    | No  | 4  |
| 145 | Osthole*                              | C <sub>15</sub> H <sub>16</sub> O <sub>3</sub> | 244.1099 | [M+H] <sup>+</sup>                  | 245.1172 | 245.1171 | -0.3 | 40.51 | 77.0430, 131.0501, 115.0561                                          | Coumarin        | No  | 13 |
| 146 | Gancaonin M                           | C <sub>20</sub> H <sub>16</sub> O <sub>6</sub> | 352.0947 | [M-H] <sup>-</sup>                  | 351.0874 | 351.0877 | 0.8  | 40.88 | 199.0758, 267.0648, 283.0963, 183.0442, 107.0510                     | Isoflavonoid    | No  | 5  |
| 147 | Isoimperatorin*                       | C <sub>16</sub> H <sub>14</sub> O <sub>4</sub> | 270.0892 | [M+H] <sup>+</sup>                  | 271.0965 | 271.0964 | 0.6  | 41.03 | 147.0448, 203.0341, 91.0573                                          | Coumarin        | No  | 3  |
| 148 | Xanthotoxol                           | C <sub>11</sub> H <sub>6</sub> O <sub>4</sub>  | 202.0266 | [M+H] <sup>+</sup>                  | 203.0339 | 203.0341 | 0.9  | 41.03 | 91.0573, 65.0434, 119.0500, 131.0506, 147.0448                       | Coumarin        | No  | 3  |

|     |                              |                                                |          |                    |          |          |      |       |                                                                    |                 |     |    |
|-----|------------------------------|------------------------------------------------|----------|--------------------|----------|----------|------|-------|--------------------------------------------------------------------|-----------------|-----|----|
| 149 | Hydroxylinolenic acid/iso    | C <sub>18</sub> H <sub>30</sub> O <sub>3</sub> | 294.2195 | [M-H] <sup>-</sup> | 293.2122 | 293.2124 | 0.6  | 41.28 | 96.9604, 148.0513, 205.1194                                        | Organic acid    | No  | 5  |
| 150 | Hydroxylinolenic acid/iso    | C <sub>18</sub> H <sub>30</sub> O <sub>3</sub> | 294.2195 | [M-H] <sup>-</sup> | 293.2122 | 293.2125 | 0.6  | 42.41 | 96.9604, 205.1194                                                  | Organic acid    | No  | 5  |
| 151 | (Alpha)-Hydroxylinoleic acid | C <sub>18</sub> H <sub>32</sub> O <sub>3</sub> | 296.2352 | [M-H] <sup>-</sup> | 295.2279 | 295.2285 | 2.1  | 42.00 | 277.2166, 195.1385, 182.5665, 171.1001, 113.0949, 98.9551, 57.0418 | Organic acid    | No  | 4  |
| 152 | Columbianadin*               | C <sub>19</sub> H <sub>20</sub> O <sub>5</sub> | 328.1311 | [M+H] <sup>+</sup> | 329.1384 | 329.1382 | -0.5 | 41.40 | 131.0503, 187.0387, 147.0442, 128.0627                             | Coumarin        | No  | 13 |
| 153 | Glyasperin A                 | C <sub>25</sub> H <sub>26</sub> O <sub>6</sub> | 422.1729 | [M+H] <sup>+</sup> | 423.1802 | 423.1797 | -1.3 | 42.09 | 299.0543, 311.0550, 367.1171, 255.0656, 147.0457, 137.0236         | Flavonol        | No  | 2  |
| 154 | Ostruthin                    | C <sub>19</sub> H <sub>22</sub> O <sub>3</sub> | 298.1569 | [M-H] <sup>-</sup> | 297.1496 | 297.1498 | 0.6  | 42.34 | 211.0396, 213.0544, 174.0314, 227.0699, 225.0554                   | Coumarin        | No  | 3  |
|     |                              |                                                |          | [M+H] <sup>+</sup> | 299.1642 | 299.1639 | -1.1 | 42.34 | 147.0447, 175.0393, 176.0468, 91.0564, 131.0496                    |                 |     |    |
| 155 | Senkyunolide P               | C <sub>24</sub> H <sub>30</sub> O <sub>4</sub> | 382.2144 | [M+H] <sup>+</sup> | 383.2217 | 383.2220 | 0.8  | 42.67 | 149.0600, 163.1120, 135.0451, 191.1079, 91.0561, 79.0566           | Phthalide       | No  | 8  |
| 156 | Ligustilide*                 | C <sub>12</sub> H <sub>14</sub> O <sub>2</sub> | 190.0994 | [M+H] <sup>+</sup> | 191.1067 | 191.1069 | 1.3  | 42.81 | 91.0578, 115.0561, 127.0567, 77.0418                               | Phthalide       | No  | 16 |
| 157 | Levistolide A*               | C <sub>24</sub> H <sub>28</sub> O <sub>4</sub> | 380.1988 | [M+H] <sup>+</sup> | 381.2060 | 381.2064 | 0.9  | 42.85 | 191.1069, 173.0962, 149.0604, 135.0451, 91.0567, 79.0689           | Diterpene ester | No  | 17 |
| 158 | Glycyrrhetic acid            | C <sub>30</sub> H <sub>46</sub> O <sub>4</sub> | 470.3396 | [M+H] <sup>+</sup> | 471.3469 | 471.3454 | -3.2 | 42.95 | 149.0984, 119.0870, 229.8111, 235.1708, 317.2121                   | Triterpene      | Yes | 2  |
| 159 | Ricinolic acid               | C <sub>18</sub> H <sub>34</sub> O <sub>3</sub> | 298.2508 | [M-H] <sup>-</sup> | 297.2435 | 297.2438 | 1.0  | 43.19 | 183.0122, 79.9570                                                  | Organic acid    | No  | 4  |

\* The peak information was compared with the standard compounds

Reference:

- 1 Y. He, Z. Tu, A. Zhou, H. Liu, L. Gao, Y. Li and C. Li, *Drugs & Clin.*, 2021, **36**, 2246–2254.
- 2 PubChem, PubChem, <https://pubchem.ncbi.nlm.nih.gov/>, (accessed January 9, 2023).
- 3 H. Guo, Beijing University of Chinese Medicine, 2019.
- 4 Z. Zhang, Y. Huang, Y. Guo, H. Liu, S. Fang and H. Zhang, *J. Chin. Med. Mater.*, 2021, **44**, 1142–1148.
- 5 X.-F. Cai, Y. Xu, H.-P. Liu, Q. Shang, J.-Q. Qiu and W. Xu, *Zhongguo Zhong Yao Za Zhi Zhongguo Zhongyao Zazhi China J. Chin. Mater. Medica*, 2022, **47**, 343–357.
- 6 G.-Q. Liu, J. Dong, H. Wang, Y. Hashi and S.-Z. Chen, *Eur. J. Mass Spectrom. Chichester Engl.*, 2012, **18**, 59–69.
- 7 J. Liu, Y. Zhang, R. Bu, H. Zhao, Y. Zhao, H. Zhang, J. Xu, T. Zhang, L. Wang and C. Liu, *Chin. Tradit. Herb. Drugs*, 2021, **52**, 5496–5513.

- 8 J. Liu, J. Wei, J. Wu, C. Du and Y. Yan, *Chin. J. Exp. Tradit. Med. Formulae*, 2021, **27**, 1–12.
- 9 M. Wan, Y. Zhang, Y. Yang, X. Liu, L. Jia and X. Yang, *J. Chin. Pharm. Sci.*, 2019, **28**, 145–159.
- 10 X. Liu, S. Jiang, K. Xu, H. Sun, Y. Zhou, X. Xu, J. Yi, Y. Gu and L. S. Ding, *J. Ethnopharmacol.*, 2009, **126**, 474–479.
- 11 X. Ma, Y. Wu, Y. Li, Y. Huang, Y. Liu, P. Luo and Z. Zhang, *Phytochem. Anal. PCA*, 2020, **31**, 355–365.
- 12 Z. Batsukh, K. Toume, B. Javzan, K. Kazuma, S.-Q. Cai, S. Hayashi, N. Kawahara, T. Maruyama and K. Komatsu, *J. Nat. Med.*, 2020, **74**, 170–188.
- 13 L. Ai, Central South University, 2007.
- 14 M. Jia, Shanghai Jiao Tong University, 2016.
- 15 W. Duan, Y. Li, Y. Zheng, C. Li, T. Lu, L. Chen and G. Peng, *Chin. Tradit. Pat. Med.*, 2020, **42**, 1237–1243.
- 16 X. Zhang, Peking Union Medical College, 2020.
- 17 G. Sun, J. Huo, S. Zhang and S. Wang, *Chin. Tradit. Pat. Med.*, 2019, **41**, 3052–3060.
- 18 S. Wang, J. Huo and G. Sun, *Chin. J. Tradit. Med. Sci. Technol.*, 2019, **26**, 362-367+483.
- 19 Y. Rong, S. Feng, D. Liu, C. Wu, S. Liang and S. Wang, *Chin. Tradit. Pat. Med.*, 2016, **38**, 1544–1550.

**Table S2** The *in vivo* metabolites of the absorbable prototypes detected in plasma, urinary, and fecal samples.

| NO. | Biotransformation                                                                         | Formula                                                          | <i>m/z</i> | Error/ppm | RT/min | % Score | Source | Parent Compound      |
|-----|-------------------------------------------------------------------------------------------|------------------------------------------------------------------|------------|-----------|--------|---------|--------|----------------------|
| 1   | Loss of C <sub>5</sub> H <sub>8</sub> +Demethylation and Glucuronide Conjugation          | C <sub>16</sub> H <sub>12</sub> O <sub>10</sub>                  | 363.0352   | -1.7      | 7.71   | 84.8    | F      | Imperatorin          |
| 2   | Glutathione Conjugation and Oxidation                                                     | C <sub>25</sub> H <sub>35</sub> N <sub>3</sub> O <sub>13</sub> S | 618.1973   | 1.5       | 8.07   | 88.4    | F      | Angelitriol          |
| 3   | Loss of O and O+Loss of Water                                                             | C <sub>17</sub> H <sub>18</sub> O <sub>6</sub>                   | 317.1030   | -0.2      | 9.47   | 82.0    | F      | Methyl chlorogenate  |
| 4   | Loss of C <sub>30</sub> H <sub>44</sub> O <sub>3</sub> +Oxidation and Internal Hydrolysis | C <sub>12</sub> H <sub>20</sub> O <sub>15</sub>                  | 403.0724   | -1.3      | 11.80  | 81.7    | F      | Glycyrrhizic acid    |
| 5   | Loss of O+Ethyl to Alcohol                                                                | C <sub>15</sub> H <sub>16</sub> O <sub>9</sub>                   | 339.0721   | -0.2      | 12.75  | 82.8    | U      | Methyl chlorogenate  |
| 6   | Sulfate Conjugation                                                                       | C <sub>14</sub> H <sub>14</sub> O <sub>7</sub> S                 | 327.0526   | -2.1      | 12.84  | 91.6    | F      | Columbianetin        |
| 7   | Loss of C <sub>30</sub> H <sub>44</sub> O <sub>3</sub> +Oxidation and Internal Hydrolysis | C <sub>12</sub> H <sub>20</sub> O <sub>15</sub>                  | 403.0723   | -1.7      | 13.26  | 80.4    | F      | Glycyrrhizic acid    |
| 8   | Loss of C <sub>30</sub> H <sub>44</sub> O <sub>3</sub> +Loss of CO                        | C <sub>11</sub> H <sub>18</sub> O <sub>12</sub>                  | 341.0719   | -2.0      | 13.47  | 84.7    | F      | Glycyrrhizic acid    |
| 9   | Loss of CH <sub>2</sub> +Glycine Conjugation                                              | C <sub>16</sub> H <sub>19</sub> NO <sub>7</sub>                  | 338.1236   | 0.5       | 13.71  | 88.8    | U      | Angelitriol          |
| 10  | Loss of C <sub>5</sub> H <sub>8</sub> O and CH <sub>2</sub> +Glycine Conjugation          | C <sub>16</sub> H <sub>19</sub> NO <sub>7</sub>                  | 338.1236   | 0.5       | 13.71  | 84.3    | U      | Angelol L/ Angelol C |
| 11  | Oxidation and Glucuronide Conjugation                                                     | C <sub>21</sub> H <sub>20</sub> O <sub>11</sub>                  | 447.0930   | -0.6      | 13.77  | 83.9    | U      | Liquiritigenin       |
| 12  | Tri-Oxidation                                                                             | C <sub>16</sub> H <sub>18</sub> O <sub>9</sub>                   | 355.1016   | -2.1      | 13.79  | 91.6    | F      | Cimifugin            |
| 13  | Di-Oxidation and Glucuronide Conjugation                                                  | C <sub>21</sub> H <sub>20</sub> O <sub>12</sub>                  | 463.0878   | -0.8      | 14.67  | 82.6    | U      | Liquiritigenin       |
| 14  | Demethylation and Di-Oxidation                                                            | C <sub>20</sub> H <sub>20</sub> O <sub>11</sub>                  | 435.0926   | -1.5      | 14.82  | 80.0    | U      | Liquiritin           |
| 15  | Di-Oxidation                                                                              | C <sub>21</sub> H <sub>22</sub> O <sub>11</sub>                  | 449.1085   | -0.9      | 14.82  | 83.8    | U      | Liquiritin           |

|    |                                                                                                            |                                                 |          |      |       |      |      |                          |
|----|------------------------------------------------------------------------------------------------------------|-------------------------------------------------|----------|------|-------|------|------|--------------------------|
| 15 | Loss of C <sub>5</sub> H <sub>8</sub> O <sub>2</sub> +Ethyl to Alcohol                                     | C <sub>13</sub> H <sub>14</sub> O <sub>6</sub>  | 267.0854 | -3.5 | 15.14 | 82.6 | F    | Angelol L/ Angelol C     |
| 16 | Oxidation and Glucuronide Conjugation                                                                      | C <sub>21</sub> H <sub>20</sub> O <sub>11</sub> | 447.0931 | -0.4 | 15.41 | 85.3 | U    | Isoliquiritigenin        |
| 17 | Di-Oxidation and Glucuronide Conjugation                                                                   | C <sub>21</sub> H <sub>20</sub> O <sub>12</sub> | 463.0876 | -1.2 | 15.48 | 83.1 | U    | Isoliquiritigenin        |
| 18 | Demethylation to Carboxylic Acid                                                                           | C <sub>16</sub> H <sub>16</sub> O <sub>8</sub>  | 337.0912 | -1.7 | 15.50 | 87.1 | F    | Cimifugin                |
| 19 | Di-Oxidation                                                                                               | C <sub>21</sub> H <sub>22</sub> O <sub>11</sub> | 449.1088 | -0.4 | 15.50 | 84.3 | U    | Isoliquiritin            |
| 20 | Loss of CH <sub>2</sub> +Oxidation and Internal Hydrolysis                                                 | C <sub>15</sub> H <sub>18</sub> O <sub>7</sub>  | 311.1114 | -3.6 | 15.65 | 83.5 | F    | 5-O-Methylvisamminol     |
|    | Loss of CH <sub>2</sub> +Internal Hydrolysis                                                               | C <sub>15</sub> H <sub>18</sub> O <sub>7</sub>  | 311.1114 | -3.6 | 15.65 | 83.7 | F    | Cimifugin                |
| 21 | Loss of CH <sub>2</sub> +Loss of Water                                                                     | C <sub>21</sub> H <sub>24</sub> O <sub>10</sub> | 437.1443 | 0.1  | 15.71 | 81.8 | F, U | Prim-O-glucosylcimifugin |
| 22 | Glucuronide Conjugation                                                                                    | C <sub>21</sub> H <sub>26</sub> O <sub>12</sub> | 471.1488 | -1.9 | 16.49 | 83.6 | F    | Angelitriol              |
| 23 | Loss of CH <sub>2</sub> +Oxidation and Internal Hydrolysis                                                 | C <sub>15</sub> H <sub>18</sub> O <sub>7</sub>  | 311.1130 | 1.4  | 16.81 | 88.5 | P    | 5-O-Methylvisamminol     |
|    | Loss of CH <sub>2</sub> +Internal Hydrolysis                                                               | C <sub>15</sub> H <sub>18</sub> O <sub>7</sub>  | 311.1130 | 1.4  | 16.81 | 88.5 | P    | Cimifugin                |
|    | Loss of CH <sub>2</sub> +Demethylation and Hydrogenation                                                   | C <sub>14</sub> H <sub>16</sub> O <sub>6</sub>  | 281.1011 | -3.2 | 16.82 | 87.3 | F    | Cimifugin                |
| 24 | Loss of CH <sub>2</sub> and C <sub>6</sub> H <sub>10</sub> O <sub>5</sub> +Demethylation and Hydrogenation | C <sub>14</sub> H <sub>16</sub> O <sub>6</sub>  | 281.1011 | -3.2 | 16.82 | 84.2 | F    | Prim-O-glucosylcimifugin |
| 25 | Parent                                                                                                     | C <sub>15</sub> H <sub>18</sub> O <sub>6</sub>  | 295.1167 | -3.2 | 16.82 | 87.8 | F, P | Angelitriol              |
| 26 | Loss of CH <sub>2</sub> +Internal Hydrolysis                                                               | C <sub>15</sub> H <sub>18</sub> O <sub>6</sub>  | 295.1177 | 0.3  | 17.16 | 95.3 | P    | 5-O-Methylvisamminol     |
| 27 | Parent                                                                                                     | C <sub>15</sub> H <sub>18</sub> O <sub>6</sub>  | 295.1180 | 1.5  | 17.17 | 84.7 | U    | Angelitriol              |
| 28 | Loss of O+Methylation                                                                                      | C <sub>21</sub> H <sub>28</sub> O <sub>6</sub>  | 377.1961 | 0.6  | 17.24 | 84.9 | U    | Angelol L/ Angelol C     |
|    | Loss of CH <sub>2</sub> O and O+Glycine Conjugation                                                        | C <sub>16</sub> H <sub>19</sub> NO <sub>5</sub> | 306.1330 | -2.0 | 17.65 | 81.8 | F    | Angelitriol              |
| 29 | Loss of C <sub>5</sub> H <sub>8</sub> O <sub>2</sub> and CH <sub>2</sub> O+Glycine Conjugation             | C <sub>16</sub> H <sub>19</sub> NO <sub>5</sub> | 306.1330 | -2.0 | 17.65 | 89.1 | F    | Angelol L/ Angelol C     |
| 30 | Parent                                                                                                     | C <sub>17</sub> H <sub>20</sub> O <sub>9</sub>  | 367.1033 | -0.4 | 17.69 | 81.9 | U    | Methyl chlorogenate      |
| 31 | Loss of C <sub>30</sub> H <sub>44</sub> O <sub>3</sub> +Oxidation and Internal Hydrolysis                  | C <sub>12</sub> H <sub>20</sub> O <sub>15</sub> | 403.0718 | -2.8 | 18.23 | 84.0 | F    | Glycyrrhizic acid        |
| 32 | Tri-Oxidation and Glucuronide Conjugation                                                                  | C <sub>27</sub> H <sub>30</sub> O <sub>14</sub> | 579.1698 | -1.8 | 18.30 | 90.8 | U    | Notopterol               |
| 33 | Loss of CH <sub>2</sub> O+Di-Hydrogenation                                                                 | C <sub>16</sub> H <sub>22</sub> O <sub>8</sub>  | 341.1249 | 2.1  | 18.32 | 80.0 | F    | Methyl chlorogenate      |
| 34 | Loss of CH <sub>2</sub> +Di-Oxidation                                                                      | C <sub>21</sub> H <sub>26</sub> O <sub>12</sub> | 471.1488 | -1.9 | 18.33 | 95.1 | P    | 5-O-methylvisammoside    |
| 35 | Loss of C <sub>15</sub> H <sub>10</sub> O <sub>3</sub> +Demethylation and Glucuronide Conjugation          | C <sub>16</sub> H <sub>26</sub> O <sub>16</sub> | 473.1134 | -2.9 | 18.44 | 80.0 | F    | Liquiritin apioside      |
| 36 | Demethylation to Carboxylic Acid                                                                           | C <sub>16</sub> H <sub>16</sub> O <sub>7</sub>  | 321.0960 | -2.8 | 18.53 | 91.3 | F, P | 5-O-Methylvisamminol     |
|    | Ketone Formation                                                                                           | C <sub>16</sub> H <sub>16</sub> O <sub>7</sub>  | 321.0960 | -2.8 | 18.53 | 92.0 | F, P | Cimifugin                |
| 37 | Oxidation and Glucuronide Conjugation                                                                      | C <sub>22</sub> H <sub>22</sub> O <sub>11</sub> | 461.1083 | -1.3 | 18.80 | 81.0 | U    | Imperatorin              |
| 38 | Loss of CH <sub>2</sub> +Loss of Water                                                                     | C <sub>14</sub> H <sub>14</sub> O <sub>5</sub>  | 263.0914 | 0.0  | 19.79 | 94.8 | P    | Angelitriol              |
|    | Loss of CH <sub>2</sub> +Demethylation                                                                     | C <sub>14</sub> H <sub>14</sub> O <sub>5</sub>  | 263.0914 | 0.0  | 19.79 | 94.6 | P    | 5-O-Methylvisamminol     |
| 39 | Loss of CH <sub>2</sub> O+Demethylation                                                                    | C <sub>14</sub> H <sub>14</sub> O <sub>5</sub>  | 263.0914 | 0.0  | 19.79 | 95.1 | P    | Cimifugin                |
| 40 | Di-Oxidation                                                                                               | C <sub>21</sub> H <sub>22</sub> O <sub>11</sub> | 449.1080 | -2.2 | 20.03 | 84.8 | U    | Liquiritin               |
| 41 | Oxidation                                                                                                  | C <sub>22</sub> H <sub>28</sub> O <sub>11</sub> | 469.1702 | -0.5 | 20.05 | 83.1 | F    | 5-O-methylvisammoside    |



|    |                                                                                                   |                                                   |          |      |       |      |      |                          |
|----|---------------------------------------------------------------------------------------------------|---------------------------------------------------|----------|------|-------|------|------|--------------------------|
| 42 | Di-Oxidation                                                                                      | C <sub>16</sub> H <sub>18</sub> O <sub>7</sub>    | 323.1120 | -1.5 | 20.19 | 95.4 | F, P | 5-O-Methylvisamminol     |
|    | Oxidation                                                                                         | C <sub>16</sub> H <sub>18</sub> O <sub>7</sub>    | 323.1120 | -1.5 | 20.19 | 96.7 | F, P | Cimifugin                |
| 43 | Sulfate Conjugation                                                                               | C <sub>21</sub> H <sub>22</sub> O <sub>12</sub> S | 497.0751 | -1.7 | 20.22 | 86.1 | U    | Liquiritin               |
| 44 | Loss of CH <sub>2</sub> +Di-Oxidation                                                             | C <sub>15</sub> H <sub>16</sub> O <sub>7</sub>    | 309.0959 | -3.1 | 20.26 | 80.8 | F    | 5-O-Methylvisamminol     |
|    | Loss of CH <sub>2</sub> +Oxidation                                                                | C <sub>15</sub> H <sub>16</sub> O <sub>7</sub>    | 309.0959 | -3.1 | 20.26 | 81.0 | F    | Cimifugin                |
| 45 | Demethylation                                                                                     | C <sub>13</sub> H <sub>14</sub> O <sub>5</sub>    | 251.0912 | -0.9 | 20.30 | 81.5 | F    | (+)-Peucedanol           |
| 46 | Loss of C <sub>5</sub> H <sub>8</sub> O <sub>2</sub> and O+S-Cysteine Conjugation                 | C <sub>18</sub> H <sub>23</sub> NO <sub>6</sub> S | 382.1315 | -0.9 | 20.43 | 88.6 | F    | Angelol L/ Angelol C     |
| 47 | Parent                                                                                            | C <sub>22</sub> H <sub>28</sub> O <sub>11</sub>   | 469.1704 | 0.0  | 20.48 | 81.3 | P    | Prim-O-glucosylcimifugin |
| 48 | Loss of Water                                                                                     | C <sub>16</sub> H <sub>14</sub> O <sub>5</sub>    | 287.0916 | 0.7  | 20.69 | 80.3 | U    | Oxypeucedanin hydrate    |
| 49 | Oxidation and Glucuronide Conjugation                                                             | C <sub>22</sub> H <sub>26</sub> O <sub>12</sub>   | 483.1496 | -0.3 | 20.71 | 81.3 | P    | 5-O-Methylvisamminol     |
|    | Glucuronide Conjugation                                                                           | C <sub>22</sub> H <sub>26</sub> O <sub>12</sub>   | 483.1496 | -0.3 | 20.71 | 90.9 | P    | Cimifugin                |
| 50 | Internal Hydrolysis and Di-Oxidation                                                              | C <sub>14</sub> H <sub>16</sub> O <sub>7</sub>    | 297.0965 | -1.3 | 20.89 | 81.8 | F    | Columbianetin            |
| 51 | Oxidation and Sulfate Conjugation                                                                 | C <sub>16</sub> H <sub>18</sub> O <sub>9</sub> S  | 387.0742 | -0.7 | 21.05 | 92.6 | F    | 5-O-Methylvisamminol     |
|    | Sulfate Conjugation                                                                               | C <sub>16</sub> H <sub>18</sub> O <sub>9</sub> S  | 387.0742 | -0.7 | 21.05 | 95.1 | F    | Cimifugin                |
| 52 | Loss of C <sub>15</sub> H <sub>10</sub> O <sub>3</sub> +Demethylation and Glucuronide Conjugation | C <sub>16</sub> H <sub>26</sub> O <sub>16</sub>   | 473.1139 | -2.0 | 21.25 | 88.1 | F    | Liquiritin apioside      |
| 53 | Oxidation and Glucuronide Conjugation                                                             | C <sub>22</sub> H <sub>22</sub> O <sub>11</sub>   | 461.1083 | -1.4 | 21.36 | 86.3 | U    | Imperatorin              |
| 54 | Loss of O and O+Methylation                                                                       | C <sub>21</sub> H <sub>28</sub> O <sub>5</sub>    | 361.2007 | -0.6 | 21.40 | 85.3 | U    | Angelol L/ Angelol C     |
| 55 | Bis-Ketone Formation                                                                              | C <sub>16</sub> H <sub>14</sub> O <sub>7</sub>    | 319.0808 | -1.3 | 21.41 | 82.5 | F    | 5-O-Methylvisamminol     |
| 56 | Loss of C <sub>5</sub> H <sub>10</sub> O <sub>2</sub> +Glucuronide Conjugation                    | C <sub>17</sub> H <sub>14</sub> O <sub>10</sub>   | 379.0661 | 0.4  | 21.52 | 83.1 | P    | Oxypeucedanin hydrate    |
| 57 | Loss of C <sub>5</sub> H <sub>10</sub> O <sub>3</sub>                                             | C <sub>11</sub> H <sub>6</sub> O <sub>3</sub>     | 187.0390 | 0.4  | 21.75 | 84.3 | P    | Oxypeucedanin hydrate    |
| 58 | Loss of CH <sub>2</sub> +Loss of Water                                                            | C <sub>14</sub> H <sub>14</sub> O <sub>5</sub>    | 263.0905 | -3.3 | 21.77 | 81.8 | F    | Angelitriol              |
| 59 | Oxidation                                                                                         | C <sub>14</sub> H <sub>14</sub> O <sub>5</sub>    | 263.0905 | -3.3 | 21.77 | 82.0 | F    | Columbianetin            |
|    | Loss of O+Ethyl to Alcohol                                                                        | C <sub>14</sub> H <sub>14</sub> O <sub>5</sub>    | 263.0905 | -3.3 | 21.77 | 82.0 | F    | 5-O-Methylvisamminol     |
| 60 | Loss of C <sub>6</sub> H <sub>10</sub> O <sub>6</sub> +Ethyl to Alcohol                           | C <sub>14</sub> H <sub>14</sub> O <sub>5</sub>    | 263.0905 | -3.3 | 21.77 | 81.6 | F    | 5-O-methylvisammioside   |
|    | Loss of O and O+Ethyl to Alcohol                                                                  | C <sub>14</sub> H <sub>14</sub> O <sub>5</sub>    | 263.0905 | -3.3 | 21.77 | 82.0 | F    | Cimifugin                |
| 61 | Parent                                                                                            | C <sub>21</sub> H <sub>22</sub> O <sub>9</sub>    | 417.1202 | 2.6  | 21.89 | 85.9 | F    | Liquiritin               |
| 62 | Loss of CH <sub>2</sub> O+Di-Hydrogenation                                                        | C <sub>15</sub> H <sub>20</sub> O <sub>4</sub>    | 265.1437 | 1.1  | 22.04 | 81.9 | U    | 5-O-Methylvisamminol     |
| 63 | Internal Hydrolysis and Di-Oxidation                                                              | C <sub>11</sub> H <sub>8</sub> O <sub>7</sub>     | 253.0336 | -2.6 | 22.46 | 83.7 | F    | Bergaptol                |
| 64 | Decarboxylation                                                                                   | C <sub>19</sub> H <sub>26</sub> O <sub>5</sub>    | 335.1855 | 0.7  | 22.55 | 86.6 | U    | Angelol L/ Angelol C     |
| 65 | Loss of C <sub>30</sub> H <sub>44</sub> O <sub>4</sub> +Demethylation                             | C <sub>11</sub> H <sub>16</sub> O <sub>12</sub>   | 339.0564 | -1.3 | 22.65 | 81.4 | F    | Glycyrrhizic acid        |
| 66 | Loss of C <sub>6</sub> H <sub>10</sub> O <sub>5</sub> +Sulfate and Glucuronide Conjugation        | C <sub>21</sub> H <sub>20</sub> O <sub>13</sub> S | 511.0542 | -1.9 | 22.66 | 80.2 | U    | Liquiritin               |
| 67 | Loss of C <sub>15</sub> H <sub>10</sub> O <sub>3</sub> +Demethylation and Glucuronide Conjugation | C <sub>16</sub> H <sub>26</sub> O <sub>16</sub>   | 473.1141 | -1.4 | 22.93 | 81.1 | F    | Liquiritin apioside      |
| 68 | Sulfate Conjugation                                                                               | C <sub>21</sub> H <sub>22</sub> O <sub>12</sub> S | 497.0753 | -1.3 | 22.96 | 81.6 | U    | Liquiritin               |
| 69 | Loss of C <sub>5</sub> H <sub>8</sub> O and CH <sub>2</sub> +Demethylation                        | C <sub>13</sub> H <sub>14</sub> O <sub>6</sub>    | 267.0866 | 1.0  | 23.15 | 80.8 | U    | Angelol L/ Angelol C     |
| 70 | Sulfate Conjugation                                                                               | C <sub>20</sub> H <sub>26</sub> O <sub>10</sub> S | 459.1319 | -0.2 | 23.40 | 87.9 | F    | Angelol L/ Angelol C     |

|    |                                                                                                |                                                  |          |      |       |      |         |                        |
|----|------------------------------------------------------------------------------------------------|--------------------------------------------------|----------|------|-------|------|---------|------------------------|
| 71 | Loss of C <sub>5</sub> H <sub>8</sub> O <sub>2</sub> and CH <sub>2</sub> O+Glucose Conjugation | C <sub>20</sub> H <sub>26</sub> O <sub>9</sub>   | 411.1647 | -0.6 | 23.40 | 98.5 | F       | Angelol L/ Angelol C   |
| 72 | Loss of CH <sub>2</sub> +Internal Hydrolysis                                                   | C <sub>15</sub> H <sub>18</sub> O <sub>6</sub>   | 295.1171 | -1.6 | 23.48 | 97.0 | F, P    | 5-O-Methylvisamminol   |
|    | Loss of CH <sub>2</sub> O+Internal Hydrolysis                                                  | C <sub>15</sub> H <sub>18</sub> O <sub>6</sub>   | 295.1171 | -1.6 | 23.48 | 97.0 | F, P    | Cimifugin              |
| 73 | Loss of C <sub>9</sub> H <sub>6</sub> O <sub>4</sub> and O+Bis-Glucuronide Conjugation         | C <sub>20</sub> H <sub>30</sub> O <sub>16</sub>  | 525.1460 | -0.2 | 23.54 | 81.7 | F       | Methyl chlorogenate    |
| 74 | Demethylation and Hydrogenation                                                                | C <sub>11</sub> H <sub>14</sub> O <sub>3</sub>   | 195.1017 | 0.8  | 23.70 | 82.0 | U       | Senkyunolide F         |
| 75 | Loss of O                                                                                      | C <sub>14</sub> H <sub>16</sub> O <sub>4</sub>   | 249.1123 | 0.8  | 23.77 | 91.6 | U       | (+)-Peusedanol         |
|    | Loss of CH <sub>2</sub> O and O                                                                | C <sub>14</sub> H <sub>16</sub> O <sub>4</sub>   | 249.1123 | 0.8  | 23.77 | 92.4 | U       | Angelitriol            |
| 76 | Oxidation and Methylation                                                                      | C <sub>17</sub> H <sub>20</sub> O <sub>6</sub>   | 321.1326 | -2.1 | 23.84 | 85.6 | F       | 5-O-Methylvisamminol   |
| 77 | Loss of C <sub>6</sub> H <sub>10</sub> O <sub>5</sub> +Oxidation and Methylation               | C <sub>17</sub> H <sub>20</sub> O <sub>6</sub>   | 321.1326 | -2.1 | 23.84 | 84.3 | F       | 5-O-methylvisammioside |
|    | Methylation                                                                                    | C <sub>17</sub> H <sub>20</sub> O <sub>6</sub>   | 321.1326 | -2.1 | 23.84 | 85.7 | F       | Cimifugin              |
| 78 | Demethylation to Carboxylic Acid                                                               | C <sub>14</sub> H <sub>12</sub> O <sub>6</sub>   | 277.0701 | -1.9 | 23.85 | 90.0 | F, P    | Columbianetin          |
| 79 | Di-Oxidation and Glucuronide Conjugation                                                       | C <sub>22</sub> H <sub>22</sub> O <sub>12</sub>  | 477.1027 | -2.4 | 23.98 | 92.2 | U       | Imperatorin            |
| 80 | Oxidation                                                                                      | C <sub>16</sub> H <sub>18</sub> O <sub>6</sub>   | 307.1168 | -2.7 | 24.06 | 91.5 | F, P    | 5-O-Methylvisamminol   |
|    | Parent                                                                                         | C <sub>16</sub> H <sub>18</sub> O <sub>6</sub>   | 307.1168 | -2.7 | 24.06 | 92.0 | F, P, U | Cimifugin              |
|    | Ethyl to Carboxylic Acid                                                                       | C <sub>15</sub> H <sub>14</sub> O <sub>7</sub>   | 307.0808 | -1.3 | 24.20 | 92.9 | F, P    | 5-O-Methylvisamminol   |
| 81 | Demethylation and Methylene to Ketone                                                          | C <sub>15</sub> H <sub>14</sub> O <sub>7</sub>   | 307.0808 | -1.3 | 24.20 | 96.2 | F, P    | Cimifugin              |
| 82 | Loss of C <sub>30</sub> H <sub>44</sub> O <sub>4</sub> +Methylation                            | C <sub>13</sub> H <sub>20</sub> O <sub>12</sub>  | 367.0872 | -2.7 | 24.22 | 82.9 | F       | Glycyrrhizic acid      |
| 83 | Oxidation and Sulfate Conjugation                                                              | C <sub>15</sub> H <sub>12</sub> O <sub>8</sub> S | 351.0178 | -0.5 | 24.22 | 92.3 | U       | Liquiritigenin         |
|    | Parent                                                                                         | C <sub>14</sub> H <sub>16</sub> O <sub>5</sub>   | 265.1078 | 2.7  | 24.28 | 80.3 | P       | (+)-Peusedanol         |
| 84 | Loss of CH <sub>2</sub> O                                                                      | C <sub>14</sub> H <sub>16</sub> O <sub>5</sub>   | 265.1078 | 2.7  | 24.28 | 84.4 | P       | Angelitriol            |
| 85 | Glucuronide Conjugation                                                                        | C <sub>20</sub> H <sub>22</sub> O <sub>10</sub>  | 423.1280 | -1.3 | 24.46 | 82.3 | P       | Columbianetin          |
| 86 | Demethylation                                                                                  | C <sub>13</sub> H <sub>12</sub> O <sub>4</sub>   | 233.0806 | -0.8 | 24.55 | 80.3 | P       | Columbianetin          |
| 87 | Ketone Formation                                                                               | C <sub>16</sub> H <sub>12</sub> O <sub>5</sub>   | 283.0620 | 2.7  | 24.59 | 91.0 | U       | Imperatorin            |
| 88 | Oxidation and Glucuronide Conjugation                                                          | C <sub>21</sub> H <sub>20</sub> O <sub>11</sub>  | 447.0926 | -1.5 | 24.65 | 91.7 | U       | Isoliquiritigenin      |
|    | Demethylation to Carboxylic Acid                                                               | C <sub>21</sub> H <sub>20</sub> O <sub>11</sub>  | 447.0926 | -1.5 | 24.65 | 92.1 | U       | Isoliquiritin          |
| 89 | Glucuronide Conjugation                                                                        | C <sub>27</sub> H <sub>30</sub> O <sub>15</sub>  | 593.1502 | -1.6 | 24.72 | 85.6 | U       | Isoliquiritin          |
| 90 | Oxidation                                                                                      | C <sub>14</sub> H <sub>14</sub> O <sub>5</sub>   | 263.0914 | -0.1 | 24.74 | 92.3 | P       | Columbianetin          |
| 91 | Loss of O+Ethyl to Alcohol                                                                     | C <sub>14</sub> H <sub>14</sub> O <sub>5</sub>   | 263.0914 | -0.1 | 24.74 | 94.8 | P       | 5-O-Methylvisamminol   |
|    | Loss of O and O+Ethyl to Alcohol                                                               | C <sub>14</sub> H <sub>14</sub> O <sub>5</sub>   | 263.0914 | -0.1 | 24.74 | 94.6 | P       | Cimifugin              |
|    | Loss of O+Loss of Water                                                                        | C <sub>15</sub> H <sub>16</sub> O <sub>4</sub>   | 261.1121 | -0.3 | 24.74 | 89.8 | U       | Angelitriol            |
| 92 | Loss of C <sub>5</sub> H <sub>8</sub> O <sub>2</sub> +Loss of Water                            | C <sub>15</sub> H <sub>16</sub> O <sub>4</sub>   | 261.1121 | -0.3 | 24.74 | 91.4 | U       | Angelol L/ Angelol C   |
| 93 | Parent                                                                                         | C <sub>22</sub> H <sub>28</sub> O <sub>10</sub>  | 453.1753 | -0.6 | 24.77 | 86.4 | F       | 5-O-methylvisammioside |
| 94 | Parent                                                                                         | C <sub>21</sub> H <sub>22</sub> O <sub>9</sub>   | 417.1185 | -1.5 | 24.79 | 98.1 | U       | Liquiritin iso         |
| 95 | Loss of C <sub>9</sub> H <sub>6</sub> O <sub>3</sub> +Glucuronide Conjugation                  | C <sub>14</sub> H <sub>22</sub> O <sub>12</sub>  | 381.1032 | -1.6 | 24.84 | 86.3 | F       | Methyl chlorogenate    |
| 96 | Glucose Conjugation                                                                            | C <sub>22</sub> H <sub>28</sub> O <sub>10</sub>  | 453.1744 | -2.4 | 24.84 | 90.6 | P       | 5-O-Methylvisamminol   |
| 97 | Oxidation and Methylation                                                                      | C <sub>17</sub> H <sub>18</sub> O <sub>7</sub>   | 335.1118 | -2.2 | 24.86 | 84.1 | F, P    | Oxypeucedanin hydrate  |
| 98 | Loss of O and O+Sulfoxide to Thioether                                                         | C <sub>14</sub> H <sub>16</sub> O <sub>2</sub>   | 217.1227 | 1.9  | 25.02 | 84.8 | U       | (+)-Peusedanol         |

|     |                                                                                         |                                                  |          |      |       |      |      |                       |
|-----|-----------------------------------------------------------------------------------------|--------------------------------------------------|----------|------|-------|------|------|-----------------------|
| 99  | Oxidation and Sulfate Conjugation                                                       | C <sub>16</sub> H <sub>14</sub> O <sub>8</sub> S | 365.0336 | -0.2 | 25.03 | 87.3 | U    | Imperatorin           |
| 100 | Loss of O and O+Methylation                                                             | C <sub>16</sub> H <sub>20</sub> O <sub>4</sub>   | 277.1439 | 1.7  | 25.05 | 93.1 | U    | Angelitriol           |
| 101 | Oxidation and Sulfate Conjugation                                                       | C <sub>15</sub> H <sub>12</sub> O <sub>8</sub> S | 351.0184 | 1.2  | 25.17 | 89.2 | U    | Liquiritigenin        |
| 102 | Loss of CH <sub>2</sub> O+Di-Acetylation of Amines                                      | C <sub>18</sub> H <sub>20</sub> O <sub>7</sub>   | 349.1275 | -2.0 | 25.27 | 84.5 | F    | Angelitriol           |
| 103 | Tetra-Oxidation                                                                         | C <sub>21</sub> H <sub>22</sub> O <sub>9</sub>   | 419.1332 | -1.0 | 25.30 | 89.9 | F    | Notopterol            |
| 104 | Demethylation and Hydrogenation                                                         | C <sub>15</sub> H <sub>14</sub> O <sub>4</sub>   | 257.0830 | 4.1  | 25.34 | 80.6 | U    | Imperatorin           |
| 105 | Loss of C <sub>6</sub> H <sub>10</sub> O <sub>6</sub> +Internal Hydrolysis              | C <sub>15</sub> H <sub>14</sub> O <sub>4</sub>   | 257.0830 | 4.1  | 25.34 | 83.0 | U    | Isoliquiritin         |
| 106 | Loss of O and O+Methylation                                                             | C <sub>16</sub> H <sub>20</sub> O <sub>4</sub>   | 277.1438 | 1.5  | 25.35 | 87.8 | U    | Angelitriol           |
| 107 | Loss of C <sub>5</sub> H <sub>8</sub> O <sub>2</sub> and O+Methylation                  | C <sub>16</sub> H <sub>20</sub> O <sub>4</sub>   | 277.1438 | 1.5  | 25.35 | 90.9 | U    | Angelol L/ Angelol C  |
| 107 | Loss of CH <sub>2</sub> +Decarboxylation                                                | C <sub>20</sub> H <sub>26</sub> O <sub>8</sub>   | 395.1694 | -1.7 | 25.49 | 88.6 | F    | 5-O-methylvisammoside |
| 108 | Loss of O and CH <sub>2</sub> O+Demethylation to Carboxylic Acid                        | C <sub>15</sub> H <sub>14</sub> O <sub>5</sub>   | 275.0916 | 0.9  | 25.53 | 80.1 | U    | 5-O-Methylvisamminol  |
| 109 | Loss of O and O+Ethyl to Alcohol                                                        | C <sub>18</sub> H <sub>22</sub> O <sub>6</sub>   | 335.1480 | -2.6 | 25.53 | 89.6 | F    | Angelol L/ Angelol C  |
| 110 | Bis-Ketone Formation                                                                    | C <sub>21</sub> H <sub>18</sub> O <sub>7</sub>   | 383.1126 | 0.1  | 25.57 | 93.9 | U    | Notopterol            |
| 111 | Parent                                                                                  | C <sub>21</sub> H <sub>22</sub> O <sub>9</sub>   | 417.1186 | -1.2 | 25.57 | 95.6 | U    | Isoliquiritin         |
| 112 | Loss of C <sub>6</sub> H <sub>10</sub> O <sub>6</sub> +Demethylation to Carboxylic Acid | C <sub>15</sub> H <sub>10</sub> O <sub>5</sub>   | 269.0462 | 2.4  | 25.59 | 86.2 | U    | Isoliquiritin         |
| 113 | Ketone Formation                                                                        | C <sub>20</sub> H <sub>24</sub> O <sub>8</sub>   | 393.1541 | -0.8 | 25.60 | 97.9 | F    | Angelol L/ Angelol C  |
| 114 | Oxidation                                                                               | C <sub>21</sub> H <sub>22</sub> O <sub>10</sub>  | 433.1129 | -2.6 | 25.65 | 84.8 | P    | Isoliquiritin         |
| 115 | Loss of CH <sub>2</sub> +Oxidation                                                      | C <sub>19</sub> H <sub>24</sub> O <sub>8</sub>   | 381.1544 | -0.1 | 25.77 | 85.1 | U    | Angelol L/ Angelol C  |
| 116 | Loss of CH <sub>2</sub> O+Glycine Conjugation                                           | C <sub>21</sub> H <sub>27</sub> NO <sub>7</sub>  | 406.1860 | -0.1 | 25.77 | 85.9 | U    | Angelol L/ Angelol C  |
| 117 | Loss of CH <sub>2</sub> +Oxidation                                                      | C <sub>15</sub> H <sub>16</sub> O <sub>6</sub>   | 293.1009 | -3.5 | 25.82 | 85.9 | F, P | 5-O-Methylvisamminol  |
| 117 | Loss of CH <sub>2</sub>                                                                 | C <sub>15</sub> H <sub>16</sub> O <sub>6</sub>   | 293.1009 | -3.5 | 25.82 | 85.9 | F, P | Cimifugin             |
| 118 | Loss of O and O+Loss of Water                                                           | C <sub>14</sub> H <sub>14</sub> O <sub>2</sub>   | 215.1067 | 0.0  | 25.93 | 88.3 | U    | (+)-Peusedanol        |
| 119 | Loss of CH <sub>2</sub> O+Internal Hydrolysis                                           | C <sub>15</sub> H <sub>18</sub> O <sub>5</sub>   | 279.1217 | -3.5 | 25.95 | 88.0 | F    | 5-O-Methylvisamminol  |
| 119 | Loss of CO                                                                              | C <sub>15</sub> H <sub>18</sub> O <sub>5</sub>   | 279.1217 | -3.5 | 25.95 | 87.9 | F    | Cimifugin             |
| 120 | Di-Oxidation                                                                            | C <sub>16</sub> H <sub>14</sub> O <sub>6</sub>   | 301.0723 | 1.7  | 25.97 | 87.9 | U    | Imperatorin           |
| 121 | Desaturation                                                                            | C <sub>16</sub> H <sub>16</sub> O <sub>5</sub>   | 289.1071 | 0.3  | 26.00 | 84.9 | U    | 5-O-Methylvisamminol  |
| 122 | Decarboxylation                                                                         | C <sub>20</sub> H <sub>22</sub> O <sub>7</sub>   | 373.1286 | -1.8 | 26.00 | 85.9 | P    | Isoliquiritin         |
| 123 | Oxidation                                                                               | C <sub>21</sub> H <sub>22</sub> O <sub>10</sub>  | 433.1133 | -1.7 | 26.00 | 89.0 | U    | Isoliquiritin         |
| 124 | Loss of O+Bis-Ketone Formation                                                          | C <sub>21</sub> H <sub>18</sub> O <sub>6</sub>   | 367.1170 | -1.6 | 26.05 | 87.3 | F    | Notopterol            |
| 125 | Loss of C <sub>5</sub> H <sub>10</sub> O <sub>3</sub> +Hydrogenation                    | C <sub>11</sub> H <sub>8</sub> O <sub>3</sub>    | 189.0549 | 1.5  | 26.07 | 80.1 | P    | Oxypeucedanin hydrate |
| 126 | Loss of CH <sub>2</sub> O+Loss of Water                                                 | C <sub>15</sub> H <sub>14</sub> O <sub>3</sub>   | 243.1014 | -0.6 | 26.07 | 86.9 | P    | 5-O-Methylvisamminol  |
| 127 | Loss of CH <sub>2</sub> O                                                               | C <sub>15</sub> H <sub>16</sub> O <sub>4</sub>   | 261.1122 | 0.1  | 26.07 | 94.4 | P    | 5-O-Methylvisamminol  |
| 128 | Loss of CH <sub>2</sub> O and O                                                         | C <sub>15</sub> H <sub>16</sub> O <sub>4</sub>   | 261.1122 | 0.1  | 26.07 | 94.4 | P    | Cimifugin             |
| 129 | Parent                                                                                  | C <sub>15</sub> H <sub>12</sub> O <sub>4</sub>   | 255.0665 | 0.8  | 26.22 | 89.0 | P    | Liquiritigenin        |
| 130 | Loss of CH <sub>2</sub> O and O+Di-Acetylation of Amines                                | C <sub>20</sub> H <sub>22</sub> O <sub>9</sub>   | 405.1202 | 2.6  | 26.23 | 85.5 | F    | Methyl chlorogenate   |
| 131 | Bis-Ketone Formation                                                                    | C <sub>20</sub> H <sub>22</sub> O <sub>9</sub>   | 407.1335 | -0.5 | 26.26 | 88.1 | F    | Angelol L/ Angelol C  |

|     |                                                                                             |                                                  |          |      |       |      |      |                       |
|-----|---------------------------------------------------------------------------------------------|--------------------------------------------------|----------|------|-------|------|------|-----------------------|
| 132 | Glucuronide Conjugation                                                                     | C <sub>26</sub> H <sub>34</sub> O <sub>13</sub>  | 555.2065 | -1.2 | 26.33 | 85.8 | F    | Angelol L/ Angelol C  |
| 133 | Loss of CH <sub>2</sub> O+Di-Hydrogenation                                                  | C <sub>16</sub> H <sub>22</sub> O <sub>8</sub>   | 341.1244 | 0.6  | 26.35 | 82.3 | U    | Methyl chlorogenate   |
| 134 | Loss of CH <sub>2</sub> O+Demethylation                                                     | C <sub>14</sub> H <sub>14</sub> O <sub>4</sub>   | 247.0966 | 0.4  | 26.37 | 94.6 | F, P | 5-O-Methylvisamminol  |
|     | Loss of CH <sub>2</sub> O and O+Demethylation                                               | C <sub>14</sub> H <sub>14</sub> O <sub>4</sub>   | 247.0966 | 0.4  | 26.37 | 96.6 | F, P | Cimifugin             |
| 135 | Hydrogenation                                                                               | C <sub>12</sub> H <sub>16</sub> O <sub>3</sub>   | 209.1173 | 0.2  | 26.40 | 80.6 | U    | Senkyunolide F        |
| 136 | Parent                                                                                      | C <sub>16</sub> H <sub>18</sub> O <sub>5</sub>   | 291.1217 | -3.6 | 26.43 | 87.6 | F    | 5-O-Methylvisamminol  |
|     | Loss of O                                                                                   | C <sub>16</sub> H <sub>18</sub> O <sub>5</sub>   | 291.1230 | 1.0  | 26.50 | 96.3 | P, F | Cimifugin             |
| 137 | Ketone Formation                                                                            | C <sub>12</sub> H <sub>12</sub> O <sub>4</sub>   | 221.0810 | 0.7  | 26.53 | 80.6 | U    | Senkyunolide F        |
| 138 | Loss of O+Sulfate Conjugation                                                               | C <sub>14</sub> H <sub>14</sub> O <sub>6</sub> S | 311.0585 | 0.3  | 26.64 | 87.2 | P    | Columbianetin         |
| 139 | Oxidation and Methylation                                                                   | C <sub>18</sub> H <sub>22</sub> O <sub>10</sub>  | 397.1138 | -0.5 | 26.66 | 89.8 | U    | Methyl chlorogenate   |
| 140 | Decarboxylation                                                                             | C <sub>15</sub> H <sub>18</sub> O <sub>3</sub>   | 247.1331 | 0.8  | 26.67 | 88.5 | U    | 5-O-Methylvisamminol  |
| 141 | Parent                                                                                      | C <sub>16</sub> H <sub>16</sub> O <sub>6</sub>   | 305.1012 | -2.5 | 26.67 | 91.3 | F, P | Oxypeucedanin hydrate |
| 142 | Loss of O and CH <sub>2</sub> O+Methylation                                                 | C <sub>16</sub> H <sub>18</sub> O <sub>3</sub>   | 259.1329 | 0.1  | 26.67 | 83.4 | U    | 5-O-Methylvisamminol  |
| 143 | Ketone Formation                                                                            | C <sub>16</sub> H <sub>16</sub> O <sub>6</sub>   | 305.1017 | -0.8 | 26.72 | 86.1 | P    | 5-O-Methylvisamminol  |
|     | Desaturation                                                                                | C <sub>16</sub> H <sub>16</sub> O <sub>6</sub>   | 305.1017 | -0.8 | 26.72 | 86.6 | P    | Cimifugin             |
| 144 | Loss of CH <sub>2</sub> O+Di-Acetylation of Amines                                          | C <sub>18</sub> H <sub>20</sub> O <sub>7</sub>   | 349.1282 | -0.1 | 26.76 | 84.1 | P    | Angelitriol           |
| 145 | Loss of CH <sub>2</sub> +Loss of CO                                                         | C <sub>13</sub> H <sub>16</sub> O <sub>5</sub>   | 253.1069 | -0.5 | 26.84 | 90.4 | U    | Angelitriol           |
|     | Loss of C <sub>5</sub> H <sub>8</sub> O and CH <sub>2</sub> +Loss of CO                     | C <sub>13</sub> H <sub>16</sub> O <sub>5</sub>   | 253.1069 | -0.5 | 26.84 | 89.2 | U    | Angelol L/ Angelol C  |
| 146 | Glucuronide Conjugation                                                                     | C <sub>21</sub> H <sub>20</sub> O <sub>10</sub>  | 431.0975 | -2.1 | 26.94 | 93.2 | U    | Liquiritigenin        |
|     | Loss of C <sub>6</sub> H <sub>10</sub> O <sub>5</sub> +Glucuronide Conjugation              | C <sub>21</sub> H <sub>20</sub> O <sub>10</sub>  | 431.0975 | -2.1 | 26.94 | 80.5 | U    | Liquiritin            |
| 147 | Loss of CH <sub>2</sub> O and O+Demethylation                                               | C <sub>13</sub> H <sub>14</sub> O <sub>4</sub>   | 235.0962 | -1.0 | 26.98 | 83.2 | P    | Angelitriol           |
| 148 | Demethylation and Hydrogenation                                                             | C <sub>13</sub> H <sub>14</sub> O <sub>4</sub>   | 235.0962 | -1.0 | 26.98 | 83.3 | P    | Columbianetin         |
| 149 | Loss of CH <sub>2</sub> O+Di-Hydrogenation                                                  | C <sub>14</sub> H <sub>20</sub> O <sub>5</sub>   | 269.1381 | -1.0 | 26.99 | 87.3 | U    | Angelitriol           |
| 150 | Oxidation and Internal Hydrolysis                                                           | C <sub>21</sub> H <sub>24</sub> O <sub>7</sub>   | 389.1590 | -1.3 | 27.06 | 95.1 | F    | Notopterol            |
| 151 | Ketone Formation                                                                            | C <sub>16</sub> H <sub>14</sub> O <sub>7</sub>   | 319.0817 | 1.4  | 27.08 | 81.0 | P    | Oxypeucedanin hydrate |
| 152 | Loss of O and O+Sulfoxide to Thioether                                                      | C <sub>20</sub> H <sub>26</sub> O <sub>4</sub>   | 331.1914 | 3.0  | 27.15 | 84.0 | U    | Angelol L/ Angelol C  |
| 153 | Desaturation                                                                                | C <sub>14</sub> H <sub>12</sub> O <sub>4</sub>   | 245.0812 | 1.6  | 27.17 | 90.4 | P    | Columbianetin         |
| 154 | Demethylation and Oxidation                                                                 | C <sub>15</sub> H <sub>12</sub> O <sub>5</sub>   | 271.0618 | 2.1  | 27.19 | 95.2 | U    | Imperatorin           |
| 155 | Ethyl to Carboxylic Acid                                                                    | C <sub>20</sub> H <sub>18</sub> O <sub>7</sub>   | 371.1121 | -1.1 | 27.30 | 91.9 | F    | Notopterol            |
| 156 | Loss of CH <sub>2</sub> O and O+Di-Hydrogenation                                            | C <sub>14</sub> H <sub>20</sub> O <sub>4</sub>   | 253.1432 | -0.8 | 27.40 | 93.3 | U    | Angelitriol           |
|     | Loss of C <sub>5</sub> H <sub>8</sub> O <sub>2</sub> and CH <sub>2</sub> O+Di-Hydrogenation | C <sub>14</sub> H <sub>20</sub> O <sub>4</sub>   | 253.1432 | -0.8 | 27.40 | 92.0 | U    | Angelol L/ Angelol C  |
| 157 | Loss of O and O+Demethylation                                                               | C <sub>15</sub> H <sub>14</sub> O <sub>4</sub>   | 259.0966 | 0.4  | 27.47 | 87.1 | P    | Oxypeucedanin hydrate |
| 158 | Loss of CH <sub>2</sub> +Loss of Water                                                      | C <sub>15</sub> H <sub>14</sub> O <sub>4</sub>   | 259.0966 | 0.4  | 27.47 | 93.1 | P    | 5-O-Methylvisamminol  |
|     | Loss of CH <sub>2</sub> O+Loss of Water                                                     | C <sub>15</sub> H <sub>14</sub> O <sub>4</sub>   | 259.0966 | 0.4  | 27.47 | 93.8 | P    | Cimifugin             |
| 159 | Loss of CO                                                                                  | C <sub>19</sub> H <sub>26</sub> O <sub>6</sub>   | 351.1804 | 0.6  | 27.51 | 82.1 | U    | Angelol L/ Angelol C  |
| 160 | Loss of CH <sub>2</sub> +Decarboxylation                                                    | C <sub>13</sub> H <sub>16</sub> O <sub>4</sub>   | 237.1120 | -0.6 | 27.57 | 93.2 | U    | Angelitriol           |
|     | Loss of C <sub>5</sub> H <sub>8</sub> O and CH <sub>2</sub> +Decarboxylation                | C <sub>13</sub> H <sub>16</sub> O <sub>4</sub>   | 237.1120 | -0.6 | 27.57 | 92.9 | U    | Angelol L/ Angelol C  |
| 161 | Loss of O+Loss of Water                                                                     | C <sub>16</sub> H <sub>14</sub> O <sub>4</sub>   | 271.0962 | -1.0 | 27.57 | 87.8 | U    | Oxypeucedanin hydrate |
| 162 | Glucuronide Conjugation                                                                     | C <sub>22</sub> H <sub>22</sub> O <sub>10</sub>  | 445.1134 | -1.3 | 27.58 | 86.4 | U    | Imperatorin           |

|     |                                                                                                   |                                                 |          |      |       |      |   |                          |
|-----|---------------------------------------------------------------------------------------------------|-------------------------------------------------|----------|------|-------|------|---|--------------------------|
| 163 | Oxidation and Methylation                                                                         | C <sub>22</sub> H <sub>24</sub> O <sub>10</sub> | 447.1288 | -1.9 | 27.66 | 87.6 | P | Isoliquiritin            |
| 164 | Loss of C <sub>6</sub> H <sub>10</sub> O <sub>6</sub> +Demethylation to Carboxylic Acid           | C <sub>15</sub> H <sub>10</sub> O <sub>5</sub>  | 269.0464 | 3.0  | 27.70 | 87.0 | U | Isoliquiritin            |
| 165 | Loss of CH <sub>2</sub> O                                                                         | C <sub>21</sub> H <sub>26</sub> O <sub>9</sub>  | 423.1649 | -0.2 | 27.71 | 83.4 | F | 5-O-methylvisammioside   |
| 166 | Loss of C <sub>5</sub> H <sub>8</sub> O <sub>2</sub> +Glycine Conjugation                         | C <sub>17</sub> H <sub>21</sub> NO <sub>6</sub> | 336.1438 | -1.2 | 27.78 | 83.9 | U | Angelol L/ Angelol C     |
| 167 | Loss of CH <sub>2</sub> O+Loss of Water                                                           | C <sub>15</sub> H <sub>14</sub> O <sub>3</sub>  | 243.1015 | -0.4 | 27.81 | 94.4 | U | 5-O-Methylvisamminol     |
|     | Loss of CH <sub>2</sub> O and O+Loss of Water                                                     | C <sub>15</sub> H <sub>14</sub> O <sub>3</sub>  | 243.1015 | -0.4 | 27.81 | 81.9 | U | Cimifugin                |
| 168 | Loss of O                                                                                         | C <sub>17</sub> H <sub>20</sub> O <sub>8</sub>  | 351.1091 | 1.7  | 27.86 | 85.7 | F | Methyl chlorogenate      |
| 169 | Methylation                                                                                       | C <sub>22</sub> H <sub>24</sub> O <sub>5</sub>  | 369.1695 | -0.4 | 27.91 | 89.9 | F | Notopterol               |
| 170 | Loss of O                                                                                         | C <sub>14</sub> H <sub>14</sub> O <sub>3</sub>  | 231.1015 | -0.2 | 28.10 | 87.6 | P | Columbianetin            |
|     | Loss of O and CH <sub>2</sub> O+Methylation                                                       | C <sub>16</sub> H <sub>18</sub> O <sub>3</sub>  | 259.1328 | -0.2 | 28.24 | 86.1 | P | 5-O-Methylvisamminol     |
| 171 | Loss of O and O+Sulfoxide to Thioether                                                            | C <sub>16</sub> H <sub>18</sub> O <sub>3</sub>  | 259.1328 | -0.2 | 28.24 | 88.1 | P | Cimifugin                |
| 172 | Loss of O+Hydrogenation                                                                           | C <sub>16</sub> H <sub>20</sub> O <sub>4</sub>  | 277.1434 | -0.1 | 28.24 | 86.4 | P | 5-O-Methylvisamminol     |
|     | Decarboxylation                                                                                   | C <sub>14</sub> H <sub>18</sub> O <sub>4</sub>  | 251.1282 | 1.8  | 28.27 | 89.1 | U | Angelitriol              |
| 173 | Loss of C <sub>5</sub> H <sub>8</sub> O+Decarboxylation                                           | C <sub>14</sub> H <sub>18</sub> O <sub>4</sub>  | 251.1282 | 1.8  | 28.27 | 90.2 | U | Angelol L/ Angelol C     |
| 174 | Oxidation                                                                                         | C <sub>21</sub> H <sub>22</sub> O <sub>6</sub>  | 371.1483 | -1.5 | 28.31 | 94.0 | F | Notopterol               |
| 175 | Loss of Water                                                                                     | C <sub>14</sub> H <sub>12</sub> O <sub>3</sub>  | 229.0860 | 0.4  | 28.32 | 82.2 | P | Columbianetin            |
| 176 | Ketone Formation                                                                                  | C <sub>15</sub> H <sub>10</sub> O <sub>5</sub>  | 269.0462 | 2.3  | 28.38 | 80.2 | U | Isoliquiritigenin        |
| 177 | Loss of Hydroxymethylene                                                                          | C <sub>15</sub> H <sub>14</sub> O <sub>5</sub>  | 275.0915 | 0.4  | 28.71 | 81.9 | P | Oxypeucedanin hydrate    |
| 178 | Loss of O and CH <sub>2</sub> O+Demethylation to Carboxylic Acid                                  | C <sub>15</sub> H <sub>14</sub> O <sub>5</sub>  | 275.0915 | 0.4  | 28.71 | 95.8 | P | 5-O-Methylvisamminol     |
| 179 | Loss of CH <sub>2</sub> +Loss of Water                                                            | C <sub>15</sub> H <sub>14</sub> O <sub>5</sub>  | 275.0915 | 0.4  | 28.71 | 96.1 | P | Cimifugin                |
| 180 | Oxidation and Methylation                                                                         | C <sub>15</sub> H <sub>16</sub> O <sub>5</sub>  | 277.1060 | -3.6 | 28.90 | 80.7 | F | Columbianetin            |
| 181 | Loss of O                                                                                         | C <sub>16</sub> H <sub>18</sub> O <sub>4</sub>  | 275.1280 | 0.9  | 29.19 | 84.6 | U | 5-O-Methylvisamminol     |
| 182 | Loss of O+Methylation                                                                             | C <sub>16</sub> H <sub>20</sub> O <sub>5</sub>  | 293.1376 | -2.4 | 29.19 | 88.0 | U | Angelitriol              |
| 183 | Internal Hydrolysis                                                                               | C <sub>16</sub> H <sub>16</sub> O <sub>5</sub>  | 287.0933 | 2.8  | 29.31 | 81.5 | U | Imperatorin              |
| 184 | Parent                                                                                            | C <sub>20</sub> H <sub>26</sub> O <sub>7</sub>  | 379.1745 | -1.7 | 29.42 | 93.3 | F | Angelol L/ Angelol C     |
|     | Loss of CH <sub>2</sub> +Internal Hydrolysis and Di-Oxidation                                     | C <sub>14</sub> H <sub>18</sub> O <sub>9</sub>  | 331.1028 | 1.3  | 29.43 | 84.3 | U | Angelitriol              |
| 185 | Loss of C <sub>5</sub> H <sub>8</sub> O and CH <sub>2</sub> +Internal Hydrolysis and Di-Oxidation | C <sub>14</sub> H <sub>18</sub> O <sub>9</sub>  | 331.1028 | 1.3  | 29.43 | 84.2 | U | Angelol L/ Angelol C     |
| 186 | Loss of O and O+Internal Hydrolysis                                                               | C <sub>16</sub> H <sub>18</sub> O <sub>5</sub>  | 291.1227 | 0.1  | 29.59 | 85.7 | U | Oxypeucedanin hydrate    |
| 187 | Desaturation                                                                                      | C <sub>20</sub> H <sub>24</sub> O <sub>7</sub>  | 377.1586 | -2.4 | 29.66 | 94.6 | F | Angelol L/ Angelol C     |
| 188 | Loss of O+Demethylation                                                                           | C <sub>20</sub> H <sub>20</sub> O <sub>4</sub>  | 325.1426 | -2.6 | 29.79 | 87.4 | F | Notopterol               |
| 189 | Loss of O and O+Sulfoxide to Thioether                                                            | C <sub>16</sub> H <sub>16</sub> O <sub>3</sub>  | 257.1173 | 0.4  | 29.81 | 84.6 | U | Oxypeucedanin hydrate    |
| 190 | Loss of C <sub>6</sub> H <sub>10</sub> O <sub>6</sub> and O                                       | C <sub>16</sub> H <sub>18</sub> O <sub>4</sub>  | 275.1278 | 0.0  | 29.81 | 84.1 | U | Prim-O-glucosylcimifugin |
|     | Loss of O+Methylation                                                                             | C <sub>16</sub> H <sub>20</sub> O <sub>5</sub>  | 293.1383 | 0.0  | 29.81 | 87.1 | U | Angelitriol              |
| 191 | Loss of C <sub>5</sub> H <sub>8</sub> O <sub>2</sub> +Methylation                                 | C <sub>16</sub> H <sub>20</sub> O <sub>5</sub>  | 293.1383 | 0.0  | 29.81 | 89.9 | U | Angelol L/ Angelol C     |
| 192 | Loss of CH <sub>2</sub>                                                                           | C <sub>15</sub> H <sub>16</sub> O <sub>5</sub>  | 277.1059 | -4.3 | 30.23 | 81.5 | F | 5-O-Methylvisamminol     |

|     |                                                                                     |                                                 |          |      |       |      |      |                          |
|-----|-------------------------------------------------------------------------------------|-------------------------------------------------|----------|------|-------|------|------|--------------------------|
|     | Loss of CH <sub>2</sub> O                                                           | C <sub>15</sub> H <sub>16</sub> O <sub>5</sub>  | 277.1059 | -4.3 | 30.23 | 81.4 | F    | Cimifugin                |
| 193 | Parent                                                                              | C <sub>20</sub> H <sub>26</sub> O <sub>7</sub>  | 379.1744 | -1.9 | 30.29 | 95.2 | F    | Angelol L/ Angelol C     |
| 194 | Loss of O+Ketone Formation                                                          | C <sub>21</sub> H <sub>20</sub> O <sub>5</sub>  | 353.1376 | -2.1 | 31.36 | 89.7 | F    | Notopterol               |
|     | Loss of O and O                                                                     | C <sub>14</sub> H <sub>16</sub> O <sub>3</sub>  | 233.1175 | 1.3  | 31.77 | 85.1 | U    | (+)-Peusedanol           |
| 195 | Loss of O and O+Loss of Hydroxymethylene                                            | C <sub>14</sub> H <sub>16</sub> O <sub>3</sub>  | 233.1175 | 1.3  | 31.77 | 90.4 | U    | Angelitriol              |
|     | Loss of C <sub>5</sub> H <sub>8</sub> O <sub>2</sub> and O+Loss of Hydroxymethylene | C <sub>14</sub> H <sub>16</sub> O <sub>3</sub>  | 233.1175 | 1.3  | 31.77 | 91.3 | U    | Angelol L/ Angelol C     |
| 196 | Loss of O+Methylation                                                               | C <sub>13</sub> H <sub>16</sub> O <sub>2</sub>  | 205.1224 | 0.3  | 31.79 | 86.9 | U    | Senkyunolide F           |
| 197 | Desaturation                                                                        | C <sub>16</sub> H <sub>14</sub> O <sub>6</sub>  | 303.0857 | -1.9 | 34.47 | 85.3 | F    | Oxypeucedanin hydrate    |
| 198 | Tri-Oxidation and Demethylation                                                     | C <sub>20</sub> H <sub>20</sub> O <sub>8</sub>  | 389.1222 | -2.3 | 34.66 | 85.5 | F    | Notopterol               |
| 199 | Demethylation and Oxidation                                                         | C <sub>20</sub> H <sub>20</sub> O <sub>6</sub>  | 357.1325 | -2.1 | 34.73 | 93.6 | F    | Notopterol               |
| 200 | Loss of O+Demethylation to Carboxylic Acid                                          | C <sub>21</sub> H <sub>20</sub> O <sub>6</sub>  | 369.1323 | -2.5 | 34.78 | 89.1 | F    | Notopterol               |
| 201 | Loss of O+Internal Hydrolysis                                                       | C <sub>21</sub> H <sub>24</sub> O <sub>5</sub>  | 357.1690 | -1.7 | 35.25 | 94.1 | F    | Notopterol               |
| 202 | Loss of C <sub>16</sub> H <sub>16</sub> O <sub>6</sub> and O+Phosphorylation        | C <sub>6</sub> H <sub>13</sub> O <sub>7</sub> P | 229.0476 | 1.7  | 35.47 | 81.8 | F    | Prim-O-glucosylcimifugin |
| 203 | Demethylation and Oxidation                                                         | C <sub>29</sub> H <sub>44</sub> O <sub>5</sub>  | 471.3107 | -1.9 | 38.70 | 95.9 | P    | Glycyrrhetic acid        |
| 204 | Loss of CO                                                                          | C <sub>20</sub> H <sub>22</sub> O <sub>4</sub>  | 327.1581 | -3.1 | 39.47 | 80.5 | F    | Notopterol               |
| 205 | Loss of C <sub>6</sub> H <sub>8</sub> O <sub>6</sub>                                | C <sub>36</sub> H <sub>54</sub> O <sub>10</sub> | 645.3668 | 3.7  | 39.80 | 82.8 | F    | Glycyrrhizic acid        |
| 206 | Loss of Water                                                                       | C <sub>21</sub> H <sub>20</sub> O <sub>4</sub>  | 337.1422 | -3.7 | 39.84 | 84.6 | F    | Notopterol               |
| 207 | Glucuronide Conjugation                                                             | C <sub>36</sub> H <sub>54</sub> O <sub>10</sub> | 645.3670 | 3.9  | 39.92 | 80.4 | F, P | Glycyrrhetic acid        |
| 208 | Methylation                                                                         | C <sub>23</sub> H <sub>30</sub> O <sub>11</sub> | 483.1864 | 0.6  | 40.96 | 88.4 | F    | Prim-O-glucosylcimifugin |
|     | Parent                                                                              | C <sub>30</sub> H <sub>46</sub> O <sub>4</sub>  | 469.3341 | 3.7  | 42.92 | 85.1 | F, P | Glycyrrhetic acid        |
| 209 | Loss of C <sub>12</sub> H <sub>16</sub> O <sub>12</sub>                             | C <sub>30</sub> H <sub>46</sub> O <sub>4</sub>  | 469.3341 | 3.7  | 42.92 | 82.6 | F    | Glycyrrhizic acid        |
| 210 | Loss of O+Demethylation and Methylene to Ketone                                     | C <sub>29</sub> H <sub>42</sub> O <sub>4</sub>  | 453.3024 | 3.0  | 42.99 | 82.1 | F    | Glycyrrhetic acid        |

**Table S3** The core genes screening through degree evaluation by CytoHubba.

| node_name       | MCC     | DMNC    | MNC | Degree | EPC    | BottleNeck | EcCentricity | Closeness | Radiality | Betweenness | Stress | ClusteringCoefficient |
|-----------------|---------|---------|-----|--------|--------|------------|--------------|-----------|-----------|-------------|--------|-----------------------|
| <b>STAT3</b>    | 3257418 | 0.50959 | 53  | 53     | 28.234 | 4          | 0.25         | 97.58333  | 6.23333   | 1336.9      | 10290  | 0.31567               |
| <b>SRC</b>      | 2094684 | 0.46176 | 50  | 52     | 28.069 | 9          | 0.25         | 96.5      | 6.21333   | 2369.616    | 14570  | 0.26923               |
| <b>HSP90AA1</b> | 1186380 | 0.43803 | 52  | 52     | 27.763 | 10         | 0.2          | 95.78333  | 6.17333   | 1301.028    | 10018  | 0.273                 |
| <b>AKT1</b>     | 2991577 | 0.44523 | 51  | 52     | 27.653 | 22         | 0.25         | 97.41667  | 6.24      | 2429.687    | 15750  | 0.26848               |
| <b>EGFR</b>     | 3720089 | 0.50065 | 49  | 50     | 27.789 | 54         | 0.25         | 96.91667  | 6.25333   | 1807.361    | 12388  | 0.30531               |
| <b>MAPK3</b>    | 3781662 | 0.51003 | 49  | 49     | 28.064 | 4          | 0.25         | 95.91667  | 6.22      | 1262.103    | 10732  | 0.32398               |
| MAPK1           | 1987507 | 0.51293 | 41  | 42     | 25.883 | 10         | 0.25         | 90.83333  | 6.11333   | 892.824     | 7142   | 0.32869               |
| VEGFA           | 1862886 | 0.55684 | 38  | 38     | 25.255 | 1          | 0.25         | 89.25     | 6.1       | 719.4835    | 6402   | 0.38407               |
| JUN             | 2619170 | 0.56071 | 36  | 36     | 24.519 | 2          | 0.2          | 88.23333  | 6.07333   | 495.8252    | 4990   | 0.39365               |
| PIK3CA          | 276204  | 0.56809 | 34  | 34     | 23.147 | 1          | 0.25         | 84.91667  | 5.98      | 398.5622    | 3764   | 0.40642               |
| TNF             | 1174004 | 0.40603 | 32  | 32     | 20.557 | 4          | 0.2          | 84.95     | 6         | 1377.296    | 9346   | 0.29637               |
| ESR1            | 1075463 | 0.52184 | 31  | 32     | 22.894 | 4          | 0.25         | 84.91667  | 6.00667   | 941.5557    | 7332   | 0.36089               |
| CASP3           | 1666134 | 0.52184 | 31  | 31     | 22.033 | 3          | 0.2          | 83.85     | 5.95333   | 363.1861    | 3388   | 0.38495               |
| GAPDH           | 461300  | 0.49911 | 28  | 30     | 21.301 | 6          | 0.2          | 85.61667  | 6.06      | 1225.967    | 7854   | 0.33103               |
| MAPK14          | 1578786 | 0.60082 | 29  | 29     | 23.26  | 3          | 0.2          | 82.9      | 5.95333   | 242.6259    | 2458   | 0.4532                |
| PTPN11          | 479506  | 0.6858  | 27  | 29     | 22.505 | 3          | 0.25         | 82.08333  | 5.93333   | 613.8244    | 4020   | 0.45813               |
| CXCL12          | 195729  | 0.63457 | 25  | 28     | 21.149 | 7          | 0.25         | 83.16667  | 5.99333   | 1510.094    | 8370   | 0.40212               |
| PTK2            | 906122  | 0.68948 | 27  | 27     | 22.225 | 1          | 0.25         | 80.75     | 5.9       | 135.4384    | 1506   | 0.53276               |
| JAK2            | 409225  | 0.60095 | 25  | 26     | 20.609 | 4          | 0.25         | 79        | 5.84      | 325.1381    | 2630   | 0.44                  |
| LCK             | 724088  | 0.66819 | 25  | 25     | 21.254 | 1          | 0.25         | 80.08333  | 5.90667   | 226.5129    | 1956   | 0.53                  |
| FGF2            | 65872   | 0.54053 | 24  | 24     | 20.224 | 4          | 0.2          | 80.03333  | 5.90667   | 232.3133    | 2238   | 0.43478               |
| MMP9            | 791317  | 0.50845 | 23  | 24     | 18.372 | 4          | 0.25         | 80.83333  | 5.94667   | 958.7931    | 6966   | 0.38043               |
| CREBBP          | 75474   | 0.52298 | 23  | 23     | 18.861 | 3          | 0.2          | 80.48333  | 5.93333   | 430.0254    | 3796   | 0.42688               |
| AR              | 7469    | 0.53428 | 20  | 23     | 18.319 | 7          | 0.2          | 79.4      | 5.89333   | 704.2778    | 5458   | 0.34783               |
| MTOR            | 421224  | 0.56172 | 23  | 23     | 20.049 | 1          | 0.2          | 77.35     | 5.8       | 90.15744    | 1038   | 0.4585                |
| APP             | 7721    | 0.44088 | 21  | 22     | 17.477 | 8          | 0.2          | 78.2      | 5.86667   | 813.1936    | 5984   | 0.33766               |

|        |        |         |    |    |        |   |      |          |         |          |      |         |
|--------|--------|---------|----|----|--------|---|------|----------|---------|----------|------|---------|
| NFKB1  | 25454  | 0.52748 | 22 | 22 | 18.757 | 1 | 0.2  | 78.98333 | 5.88667 | 140.1805 | 1686 | 0.43723 |
| CDC42  | 393726 | 0.75205 | 22 | 22 | 20.612 | 1 | 0.25 | 77.33333 | 5.83333 | 36.85099 | 628  | 0.62338 |
| KDR    | 102657 | 0.59915 | 21 | 22 | 18.264 | 1 | 0.25 | 77.33333 | 5.82667 | 217.0398 | 1696 | 0.45887 |
| PRKCA  | 46984  | 0.40132 | 21 | 21 | 17.797 | 1 | 0.2  | 75.9     | 5.76667 | 180.7261 | 1592 | 0.3381  |
| NR3C1  | 63716  | 0.58966 | 19 | 21 | 18.129 | 4 | 0.2  | 78.18333 | 5.85333 | 718.3628 | 5862 | 0.42381 |
| RAC1   | 514953 | 0.7308  | 20 | 21 | 19.488 | 1 | 0.25 | 77.16667 | 5.84    | 196.2621 | 1894 | 0.56667 |
| PIK3CD | 19476  | 0.50871 | 21 | 21 | 16.714 | 1 | 0.2  | 74.48333 | 5.71333 | 103.677  | 1080 | 0.42857 |
| MAP2K1 | 45760  | 0.52567 | 21 | 21 | 17.826 | 1 | 0.25 | 76.91667 | 5.80667 | 178.2607 | 1444 | 0.44286 |
| FOS    | 873610 | 0.59569 | 20 | 20 | 17.741 | 3 | 0.2  | 77.4     | 5.85333 | 192.7572 | 1664 | 0.51053 |
| IGF1R  | 211878 | 0.58955 | 20 | 20 | 18.334 | 2 | 0.2  | 76.48333 | 5.81333 | 231.0205 | 2334 | 0.50526 |
| HSPA8  | 3375   | 0.52948 | 16 | 19 | 15.757 | 4 | 0.2  | 77.48333 | 5.87333 | 881.4366 | 5480 | 0.34503 |
| IL2    | 967200 | 0.75718 | 19 | 19 | 18.999 | 1 | 0.2  | 76.18333 | 5.80667 | 35.38596 | 548  | 0.66082 |
| GSK3B  | 3286   | 0.43554 | 19 | 19 | 14.914 | 1 | 0.2  | 75.4     | 5.78667 | 232.3675 | 2042 | 0.38012 |
| MAPT   | 11384  | 0.5142  | 18 | 18 | 16.703 | 1 | 0.2  | 76.28333 | 5.84667 | 187.2887 | 2000 | 0.45752 |
| MET    | 187446 | 0.74927 | 18 | 18 | 17.966 | 1 | 0.2  | 74.56667 | 5.76    | 21.48974 | 372  | 0.66667 |
| PTGS2  | 363728 | 0.46953 | 17 | 17 | 14.267 | 5 | 0.2  | 75.6     | 5.81333 | 959.9037 | 5656 | 0.42647 |
| SIRT1  | 3841   | 0.60089 | 15 | 16 | 15.425 | 2 | 0.2  | 73.1     | 5.72    | 107.9447 | 948  | 0.5     |
| KIT    | 19932  | 0.5564  | 16 | 16 | 17.134 | 1 | 0.25 | 73.83333 | 5.76667 | 85.8658  | 968  | 0.51667 |
| NTRK1  | 1171   | 0.49073 | 15 | 16 | 16.216 | 1 | 0.2  | 73.35    | 5.72667 | 101.763  | 1072 | 0.40833 |
| SNCA   | 3799   | 0.52077 | 15 | 16 | 13.601 | 4 | 0.2  | 74.45    | 5.8     | 1087.34  | 5922 | 0.43333 |
| CDK2   | 3470   | 0.53079 | 15 | 15 | 15.164 | 2 | 0.2  | 71.93333 | 5.68667 | 51.97384 | 582  | 0.50476 |
| JAK3   | 142200 | 0.74324 | 14 | 14 | 15.23  | 1 | 0.2  | 71.93333 | 5.7     | 11.45095 | 214  | 0.72527 |
| CDK1   | 228    | 0.37162 | 14 | 14 | 12.352 | 1 | 0.2  | 71.06667 | 5.66    | 125.989  | 1108 | 0.36264 |
| PLG    | 276    | 0.32197 | 12 | 14 | 8.062  | 4 | 0.2  | 69.45    | 5.62    | 737.8993 | 4678 | 0.24176 |
| HSPA5  | 3134   | 0.5237  | 13 | 13 | 12.053 | 1 | 0.2  | 73.61667 | 5.80667 | 206.1849 | 1750 | 0.52564 |
| HSPA1A | 1518   | 0.58756 | 13 | 13 | 13.685 | 1 | 0.2  | 72.9     | 5.76667 | 44.6676  | 540  | 0.58974 |
| CDK4   | 848    | 0.49815 | 13 | 13 | 12.352 | 1 | 0.2  | 70.65    | 5.66    | 44.70128 | 532  | 0.5     |
| FLT1   | 43488  | 0.67697 | 13 | 13 | 14.205 | 1 | 0.25 | 69.66667 | 5.63333 | 16.19088 | 218  | 0.67949 |



|         |        |         |    |    |        |   |         |          |         |          |      |         |
|---------|--------|---------|----|----|--------|---|---------|----------|---------|----------|------|---------|
| MMP2    | 13080  | 0.68784 | 12 | 12 | 14.481 | 1 | 0.25    | 73       | 5.79333 | 48.05803 | 782  | 0.71212 |
| PIK3CG  | 2904   | 0.6293  | 12 | 12 | 13.671 | 1 | 0.25    | 69.83333 | 5.65333 | 11.32936 | 184  | 0.65152 |
| FGF1    | 298    | 0.38051 | 12 | 12 | 11.87  | 1 | 0.2     | 68.01667 | 5.56667 | 18.14216 | 266  | 0.39394 |
| MAP2K7  | 758    | 0.55613 | 12 | 12 | 14.255 | 1 | 0.2     | 70.1     | 5.64667 | 14.20552 | 214  | 0.57576 |
| F2      | 155    | 0.46652 | 8  | 11 | 10.412 | 4 | 0.25    | 68.91667 | 5.62667 | 421.6281 | 2846 | 0.30909 |
| TERT    | 942    | 0.59388 | 11 | 11 | 12.251 | 1 | 0.2     | 69.26667 | 5.62667 | 10.35815 | 142  | 0.63636 |
| NOS2    | 508    | 0.45814 | 11 | 11 | 12.929 | 2 | 0.2     | 72.23333 | 5.76    | 137.8482 | 1152 | 0.49091 |
| ESR2    | 403202 | 0.7466  | 11 | 11 | 13.356 | 1 | 0.2     | 71.65    | 5.74    | 56.11026 | 756  | 0.8     |
| IKBB    | 774    | 0.57691 | 11 | 11 | 12.914 | 1 | 0.2     | 71.31667 | 5.72667 | 13.16544 | 212  | 0.61818 |
| PLA2G4A | 756    | 0.4242  | 11 | 11 | 7.987  | 3 | 0.2     | 67.1     | 5.53333 | 226.6756 | 1750 | 0.45455 |
| CDK6    | 816    | 0.59388 | 11 | 11 | 12.061 | 1 | 0.2     | 69.23333 | 5.62667 | 21.14066 | 274  | 0.63636 |
| MMP1    | 1806   | 0.54298 | 11 | 11 | 9.941  | 2 | 0.2     | 67.35    | 5.54667 | 201.0688 | 1842 | 0.58182 |
| AHR     | 58     | 0.33919 | 10 | 10 | 9.351  | 5 | 0.2     | 68.48333 | 5.60667 | 183.6636 | 1344 | 0.37778 |
| PARP1   | 194    | 0.49882 | 10 | 10 | 11.654 | 1 | 0.2     | 68.1     | 5.6     | 18.14209 | 224  | 0.55556 |
| PTPN2   | 3002   | 0.61853 | 10 | 10 | 12.018 | 1 | 0.2     | 68.56667 | 5.62667 | 13.30254 | 176  | 0.68889 |
| FLT3    | 386    | 0.52506 | 9  | 9  | 11.661 | 1 | 0.2     | 67.93333 | 5.6     | 6.80234  | 142  | 0.61111 |
| CCNB1   | 68     | 0.40573 | 9  | 9  | 8.685  | 1 | 0.2     | 65.35    | 5.49333 | 33.32721 | 358  | 0.47222 |
| ALOX15  | 723    | 0.71324 | 6  | 9  | 3.956  | 2 | 0.16667 | 60.6     | 5.25333 | 204.1599 | 824  | 0.44444 |
| MMP3    | 1562   | 0.59666 | 9  | 9  | 9.406  | 1 | 0.2     | 68.61667 | 5.64667 | 24.46578 | 286  | 0.69444 |
| FLT4    | 1488   | 0.62053 | 9  | 9  | 10.461 | 1 | 0.2     | 65.81667 | 5.52    | 3.70406  | 68   | 0.72222 |
| CYP3A4  | 15     | 0.25611 | 7  | 8  | 2.412  | 1 | 0.16667 | 53.33333 | 4.84667 | 110.939  | 392  | 0.25    |
| NFE2L2  | 132    | 0.43736 | 8  | 8  | 10.04  | 1 | 0.2     | 65.58333 | 5.50667 | 11.45219 | 144  | 0.53571 |
| CYP1A1  | 18     | 0.26242 | 8  | 8  | 3.826  | 1 | 0.16667 | 57.83333 | 5.13333 | 175.6554 | 1416 | 0.32143 |
| SLC2A1  | 38     | 0.34989 | 8  | 8  | 7.402  | 1 | 0.2     | 65.85    | 5.52667 | 498.3941 | 3714 | 0.42857 |
| PLA2G2A | 727    | 0.62199 | 7  | 8  | 4.481  | 3 | 0.2     | 62.66667 | 5.38    | 113.8601 | 916  | 0.60714 |
| PTGS1   | 723    | 0.5854  | 7  | 8  | 3.257  | 1 | 0.16667 | 55.46667 | 5.01333 | 40.36232 | 134  | 0.57143 |
| INSR    | 74     | 0.47564 | 7  | 7  | 7.683  | 2 | 0.2     | 63.25    | 5.41333 | 15.16172 | 148  | 0.61905 |
| CASP7   | 22     | 0.32929 | 7  | 7  | 7.39   | 1 | 0.2     | 64.26667 | 5.47333 | 9.48525  | 108  | 0.42857 |

|         |     |         |   |   |       |   |         |          |         |          |      |         |
|---------|-----|---------|---|---|-------|---|---------|----------|---------|----------|------|---------|
| CALM1   | 33  | 0.42794 | 6 | 7 | 8.368 | 1 | 0.2     | 66.06667 | 5.55333 | 37.94229 | 350  | 0.42857 |
| CDK5R1  | 18  | 0.2927  | 7 | 7 | 7.64  | 1 | 0.2     | 63.18333 | 5.43333 | 6.47166  | 86   | 0.38095 |
| ADAM17  | 24  | 0.42794 | 6 | 6 | 7.857 | 1 | 0.2     | 66.9     | 5.60667 | 8.23855  | 130  | 0.6     |
| CYP1A2  | 11  | 0.32413 | 5 | 6 | 4.153 | 1 | 0.2     | 60.26667 | 5.32667 | 126.197  | 740  | 0.33333 |
| ALOX12  | 720 | 0.71324 | 6 | 6 | 3.065 | 1 | 0.16667 | 54.13333 | 4.98    | 0        | 0    | 1       |
| ALOX5   | 720 | 0.71324 | 6 | 6 | 3.083 | 1 | 0.16667 | 54.13333 | 4.98    | 0        | 0    | 1       |
| CYP19A1 | 8   | 0.2842  | 4 | 6 | 4.783 | 1 | 0.2     | 58.5     | 5.2     | 94.33565 | 720  | 0.26667 |
| NLRP3   | 9   | 0.25931 | 5 | 6 | 6.677 | 2 | 0.2     | 64.6     | 5.50667 | 52.6534  | 418  | 0.26667 |
| AURKA   | 10  | 0.32413 | 5 | 5 | 4.906 | 1 | 0.2     | 62.01667 | 5.40667 | 11.21601 | 124  | 0.5     |
| HK2     | 10  | 0.32413 | 5 | 5 | 3.252 | 4 | 0.2     | 60       | 5.3     | 407.157  | 2308 | 0.5     |
| EIF4E   | 18  | 0.45378 | 5 | 5 | 6.565 | 1 | 0.2     | 62.16667 | 5.4     | 1.80052  | 22   | 0.7     |
| CFTR    | 10  | 0.32413 | 5 | 5 | 7.012 | 1 | 0.25    | 65.33333 | 5.56    | 24.28077 | 234  | 0.5     |
| HSD11B1 | 8   | 0.46346 | 3 | 5 | 3.18  | 1 | 0.16667 | 53.98333 | 4.96667 | 95.09433 | 778  | 0.4     |
| LGALS3  | 6   | 0.30898 | 3 | 5 | 4.077 | 6 | 0.2     | 62.45    | 5.44667 | 375.7154 | 2012 | 0.2     |
| ELANE   | 7   | 0.2842  | 4 | 5 | 2.951 | 3 | 0.2     | 53.86667 | 5       | 43.60137 | 434  | 0.3     |
| CYP2D6  | 8   | 0.37893 | 4 | 4 | 1.694 | 1 | 0.14286 | 45.30952 | 4.38    | 3.58333  | 10   | 0.66667 |
| DPP4    | 4   | 0       | 1 | 4 | 2.694 | 4 | 0.2     | 57.26667 | 5.2     | 803.4385 | 4088 | 0       |
| IDO1    | 7   | 0.46346 | 3 | 4 | 3.817 | 1 | 0.2     | 56.58333 | 5.14667 | 34.48272 | 236  | 0.5     |
| PSEN1   | 24  | 0.56839 | 4 | 4 | 4.506 | 1 | 0.16667 | 55.81667 | 5.11333 | 0        | 0    | 1       |
| PLK1    | 8   | 0.37893 | 4 | 4 | 4.504 | 1 | 0.16667 | 58.68333 | 5.22667 | 3.00299  | 52   | 0.66667 |
| CD38    | 5   | 0.30898 | 3 | 4 | 4.963 | 1 | 0.2     | 57.68333 | 5.2     | 1.61379  | 16   | 0.33333 |
| PTPN22  | 7   | 0.46346 | 3 | 4 | 5.804 | 1 | 0.2     | 62.9     | 5.46667 | 7.96497  | 74   | 0.5     |
| MPO     | 5   | 0.30898 | 3 | 4 | 3.602 | 1 | 0.2     | 57.33333 | 5.17333 | 39.80463 | 230  | 0.33333 |
| F3      | 4   | 0.30779 | 2 | 4 | 3.496 | 1 | 0.2     | 57.6     | 5.20667 | 67.52682 | 338  | 0.33333 |
| HK1     | 8   | 0.37893 | 4 | 4 | 1.633 | 1 | 0.16667 | 46.8     | 4.56    | 13.22314 | 102  | 0.66667 |
| INSRR   | 24  | 0.56839 | 4 | 4 | 3.833 | 1 | 0.2     | 55.41667 | 5.07333 | 0        | 0    | 1       |
| ABCB1   | 3   | 0.30779 | 2 | 3 | 2.156 | 2 | 0.16667 | 52.35    | 4.94667 | 75.55687 | 488  | 0.33333 |
| ADA     | 3   | 0       | 1 | 3 | 1.216 | 3 | 0.16667 | 42.88333 | 4.27333 | 515.0914 | 2560 | 0       |

|         |   |         |   |   |       |   |         |          |         |          |      |         |
|---------|---|---------|---|---|-------|---|---------|----------|---------|----------|------|---------|
| TTR     | 6 | 0.46346 | 3 | 3 | 4.211 | 1 | 0.2     | 53.48333 | 5.03333 | 0        | 0    | 1       |
| PKN1    | 3 | 0.30779 | 2 | 3 | 3.946 | 1 | 0.2     | 55.83333 | 5.11333 | 1.08219  | 10   | 0.33333 |
| SHBG    | 4 | 0.30898 | 3 | 3 | 3.919 | 1 | 0.2     | 55.58333 | 5.11333 | 0.69815  | 16   | 0.66667 |
| TRPV1   | 3 | 0       | 1 | 3 | 3.854 | 1 | 0.2     | 58.56667 | 5.26    | 3.33683  | 34   | 0       |
| SLC6A2  | 3 | 0       | 1 | 3 | 2.085 | 3 | 0.2     | 50.65    | 4.87333 | 662.2115 | 3002 | 0       |
| MMP7    | 4 | 0.30898 | 3 | 3 | 2.384 | 1 | 0.16667 | 49.5     | 4.76667 | 2.88083  | 20   | 0.66667 |
| RPS6KA3 | 6 | 0.46346 | 3 | 3 | 4.768 | 1 | 0.2     | 59.93333 | 5.34667 | 0        | 0    | 1       |
| F10     | 3 | 0.30779 | 2 | 3 | 2.372 | 1 | 0.2     | 50.55    | 4.84    | 11.6905  | 52   | 0.33333 |
| PIM1    | 6 | 0.46346 | 3 | 3 | 4.111 | 1 | 0.2     | 58.83333 | 5.27333 | 0        | 0    | 1       |
| RORC    | 6 | 0.46346 | 3 | 3 | 4.204 | 1 | 0.2     | 58.83333 | 5.27333 | 0        | 0    | 1       |
| PFKFB3  | 6 | 0.46346 | 3 | 3 | 1.606 | 1 | 0.16667 | 46.3     | 4.55333 | 0        | 0    | 1       |
| PRKCH   | 6 | 0.46346 | 3 | 3 | 5.629 | 1 | 0.2     | 62.06667 | 5.43333 | 0        | 0    | 1       |
| ABCG2   | 2 | 0       | 1 | 2 | 2.549 | 2 | 0.2     | 59.26667 | 5.33333 | 76.36231 | 490  | 0       |
| ADORA2A | 2 | 0       | 1 | 2 | 1.133 | 1 | 0.14286 | 34.99286 | 3.44    | 21.8468  | 50   | 0       |
| DRD2    | 2 | 0       | 1 | 2 | 1.269 | 1 | 0.16667 | 38.85    | 3.93333 | 95.32684 | 440  | 0       |
| AGTR1   | 2 | 0       | 1 | 2 | 2.712 | 1 | 0.2     | 52.65    | 4.96    | 1.08182  | 8    | 0       |
| NOX4    | 2 | 0       | 1 | 2 | 3.192 | 1 | 0.2     | 59.5     | 5.32667 | 0.57771  | 12   | 0       |
| BCHE    | 2 | 0.30779 | 2 | 2 | 2.686 | 1 | 0.2     | 52.05    | 4.95333 | 0        | 0    | 1       |
| ARG1    | 2 | 0.30779 | 2 | 2 | 3.093 | 1 | 0.2     | 54.33333 | 5.08    | 0        | 0    | 1       |
| CTSL    | 2 | 0       | 1 | 2 | 3.888 | 1 | 0.2     | 58.85    | 5.31333 | 0.65255  | 14   | 0       |
| CXCR1   | 2 | 0.30779 | 2 | 2 | 2.604 | 1 | 0.2     | 52.71667 | 5.00667 | 0        | 0    | 1       |
| GRK6    | 2 | 0.30779 | 2 | 2 | 2.39  | 1 | 0.2     | 52.71667 | 5.00667 | 0        | 0    | 1       |
| MMP8    | 2 | 0       | 1 | 2 | 1.508 | 1 | 0.16667 | 47.41667 | 4.65333 | 2.88083  | 20   | 0       |
| TREH    | 2 | 0.30779 | 2 | 2 | 1.369 | 1 | 0.16667 | 42.88333 | 4.31333 | 0        | 0    | 1       |
| HSD11B2 | 2 | 0.30779 | 2 | 2 | 2.108 | 1 | 0.16667 | 51.23333 | 4.88667 | 0        | 0    | 1       |
| MMP12   | 2 | 0.30779 | 2 | 2 | 2.972 | 1 | 0.2     | 53.21667 | 5.03333 | 0        | 0    | 1       |
| MMP13   | 2 | 0.30779 | 2 | 2 | 3.072 | 1 | 0.16667 | 54.35    | 5.07333 | 0        | 0    | 1       |
| TLR9    | 2 | 0.30779 | 2 | 2 | 2.773 | 1 | 0.16667 | 53.66667 | 5.03333 | 0        | 0    | 1       |

|        |   |         |   |   |       |   |         |          |         |     |      |   |
|--------|---|---------|---|---|-------|---|---------|----------|---------|-----|------|---|
| P2RX1  | 2 | 0       | 1 | 2 | 1.19  | 2 | 0.16667 | 42.18333 | 4.26667 | 298 | 1260 | 0 |
| P2RY1  | 2 | 0       | 1 | 2 | 2.516 | 3 | 0.2     | 57.81667 | 5.24667 | 592 | 2516 | 0 |
| PTGES  | 2 | 0.30779 | 2 | 2 | 1.896 | 1 | 0.16667 | 49.96667 | 4.83333 | 0   | 0    | 1 |
| ADORA3 | 1 | 0       | 1 | 1 | 1.063 | 1 | 0.14286 | 33.13571 | 3.28    | 0   | 0    | 0 |
| CHRNA7 | 1 | 0       | 1 | 1 | 2.037 | 1 | 0.16667 | 50.21667 | 4.87333 | 0   | 0    | 0 |
| BRD4   | 1 | 0       | 1 | 1 | 1.968 | 1 | 0.16667 | 50.71667 | 4.9     | 0   | 0    | 0 |
| CD14   | 1 | 0       | 1 | 1 | 2.451 | 1 | 0.2     | 51.58333 | 4.94    | 0   | 0    | 0 |
| MPG    | 1 | 0       | 1 | 1 | 2.121 | 1 | 0.2     | 52.75    | 5.01333 | 0   | 0    | 0 |
| HPRT1  | 1 | 0       | 1 | 1 | 2.492 | 1 | 0.16667 | 53.26667 | 5.06667 | 0   | 0    | 0 |
| RNASE1 | 1 | 0       | 1 | 1 | 2.197 | 1 | 0.16667 | 50.1     | 4.88    | 0   | 0    | 0 |
| HTR2A  | 1 | 0       | 1 | 1 | 1.096 | 1 | 0.16667 | 37.66667 | 3.88    | 0   | 0    | 0 |
| LGALS9 | 1 | 0       | 1 | 1 | 1.25  | 1 | 0.16667 | 43.71667 | 4.45333 | 0   | 0    | 0 |
| P2RY11 | 1 | 0       | 1 | 1 | 1.054 | 1 | 0.14286 | 32.90238 | 3.27333 | 0   | 0    | 0 |

**Table S4** The degree of each compound in the QHSSD-absorbable compound-target-RA network.

| Name                     | Degree | Type | Selected (TOP 8) |
|--------------------------|--------|------|------------------|
| <b>Isoliquiritin</b>     | 61     | mol  | √                |
| <b>Glycyrrhizic Acid</b> | 60     | mol  | √                |
| <b>Cimifugin</b>         | 38     | mol  | √                |
| <b>Ferulic Acid</b>      | 37     | mol  | √                |
| <b>Imperatorin</b>       | 26     | mol  | √                |
| <b>Angelitriol</b>       | 22     | mol  | √                |
| <b>Notopterol</b>        | 18     | mol  | √                |
| <b>Senkyunolide F</b>    | 18     | mol  | √                |
| Isoliquiritigenin        | 17     | mol  | -                |
| Caffeic Acid             | 16     | mol  | -                |
| Liquiritin               | 16     | mol  | -                |
| 3',5'-Cyclic GMP         | 14     | mol  | -                |
| Khellinquinone           | 13     | mol  | -                |
| Methyl Chlorogenate      | 12     | mol  | -                |
| 5-O-Methylvisammioside   | 12     | mol  | -                |
| Glycyrrhetic Acid        | 9      | mol  | -                |
| Prim-O-Glucosylcimifugin | 9      | mol  | -                |
| liquiritin apioside      | 8      | mol  | -                |
| Psoralen                 | 8      | mol  | -                |
| (+)-Peucedanol           | 7      | mol  | -                |
| Liquiritigenin           | 6      | mol  | -                |
| Oxypeucedanin Hydrate    | 5      | mol  | -                |
| 5-O-Methylvisamminol     | 5      | mol  | -                |
| Angelol L                | 5      | mol  | -                |
| Columbianetin            | 3      | mol  | -                |
| Angelol C                | 2      | mol  | -                |

## Coumarins

### Simple coumarins

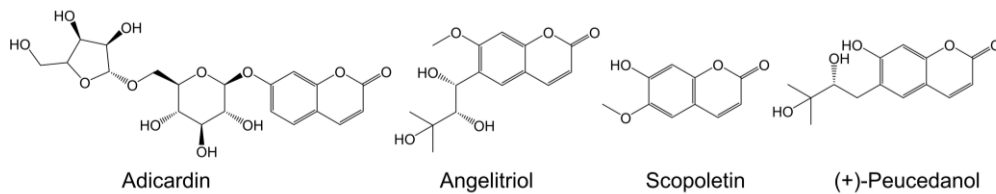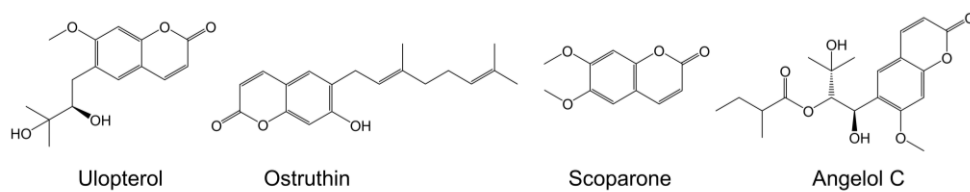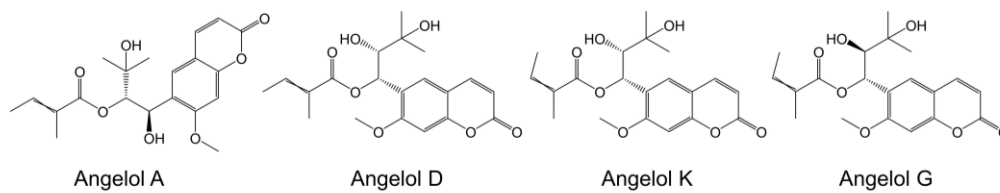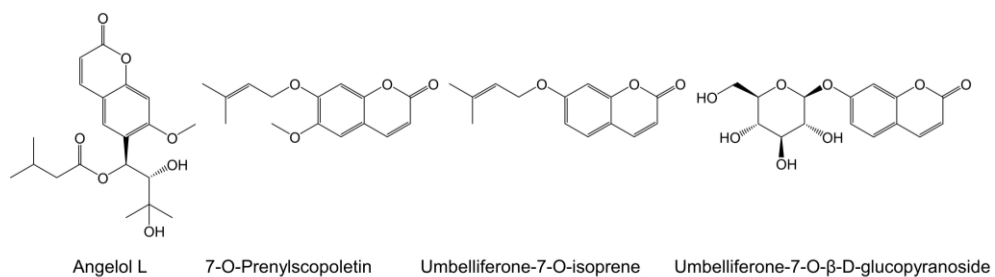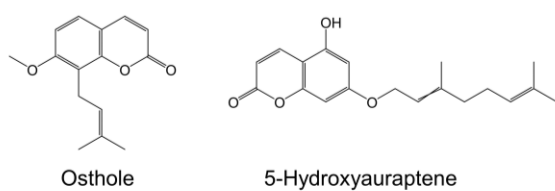

## Linear furanocoumarins

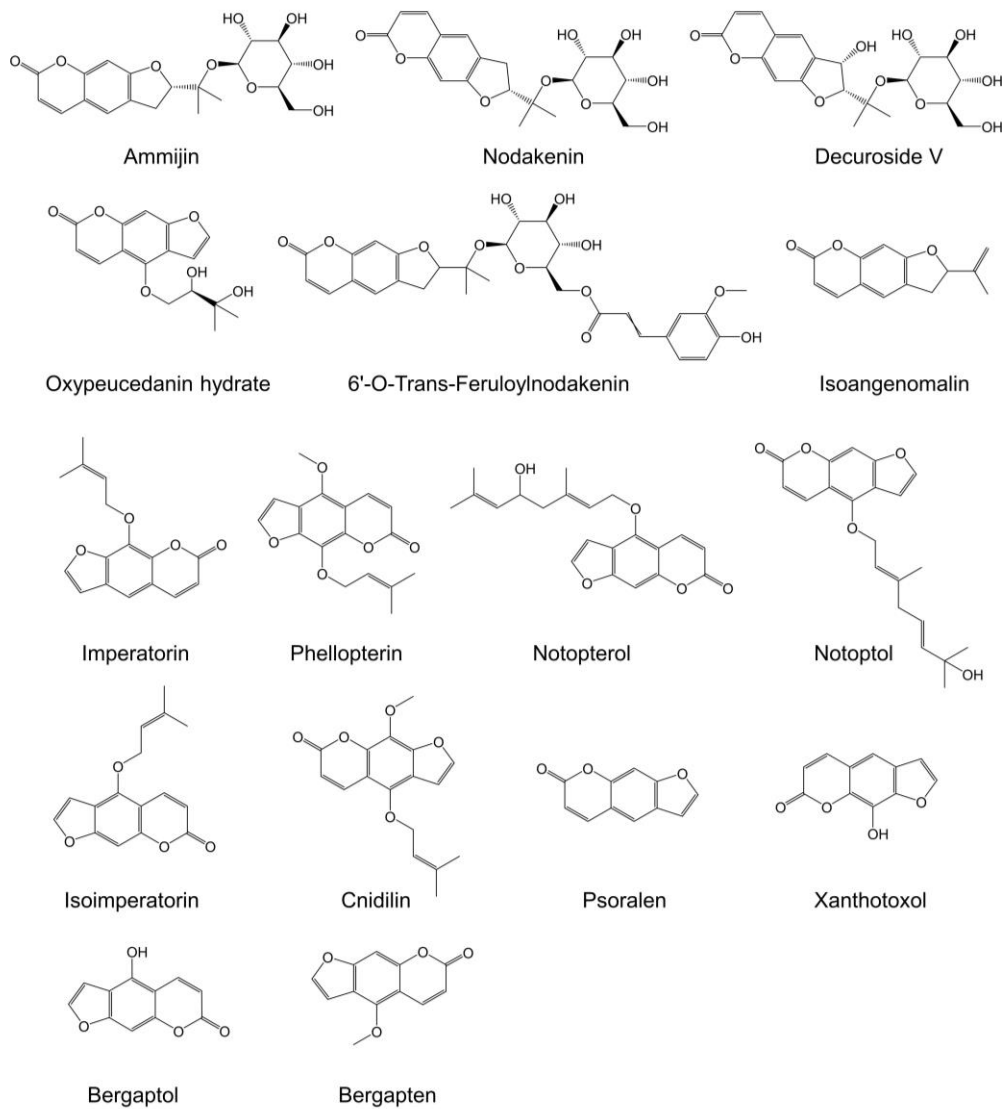

## Angular furanocoumarins

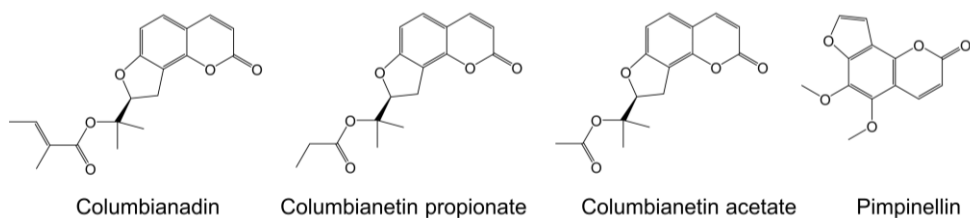

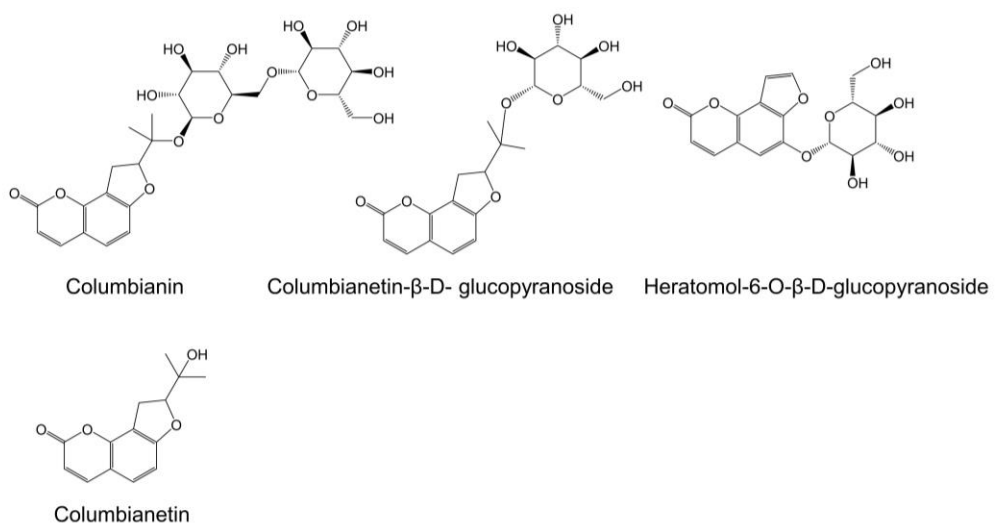

**Fig. S1.** Chemical structures of the coumarins in QHSSD.



## Flavones

### Flavonoids

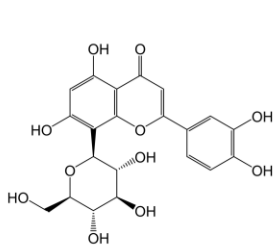

Orientin

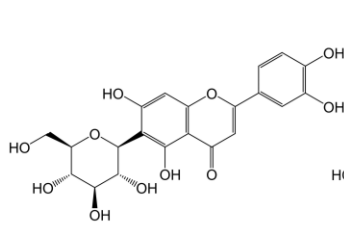

Isoorientin

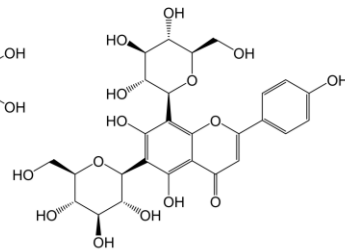

Vicenin-2

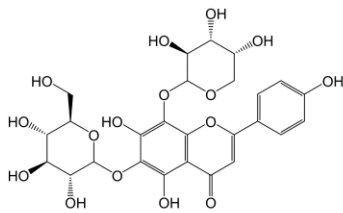

Schaftoside

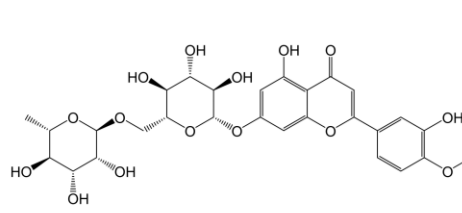

Diosmin

### Flavonols

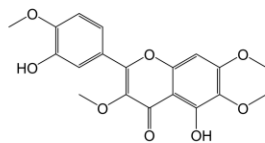

Casticin

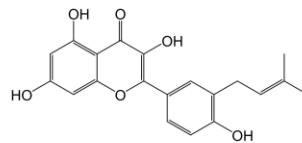

Isolicoflavonol

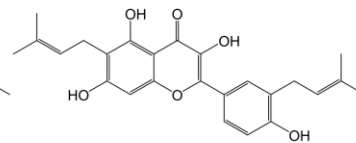

Glyasperin A

### Dihydroflavonoids

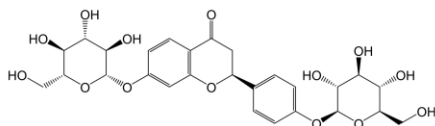

Liquiritigenin 4',7-diglucoside

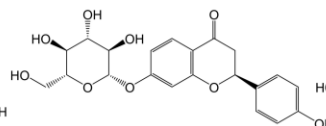

Neoliquiritin

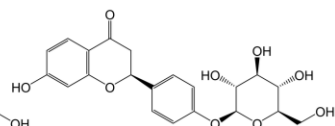

Liquiritin

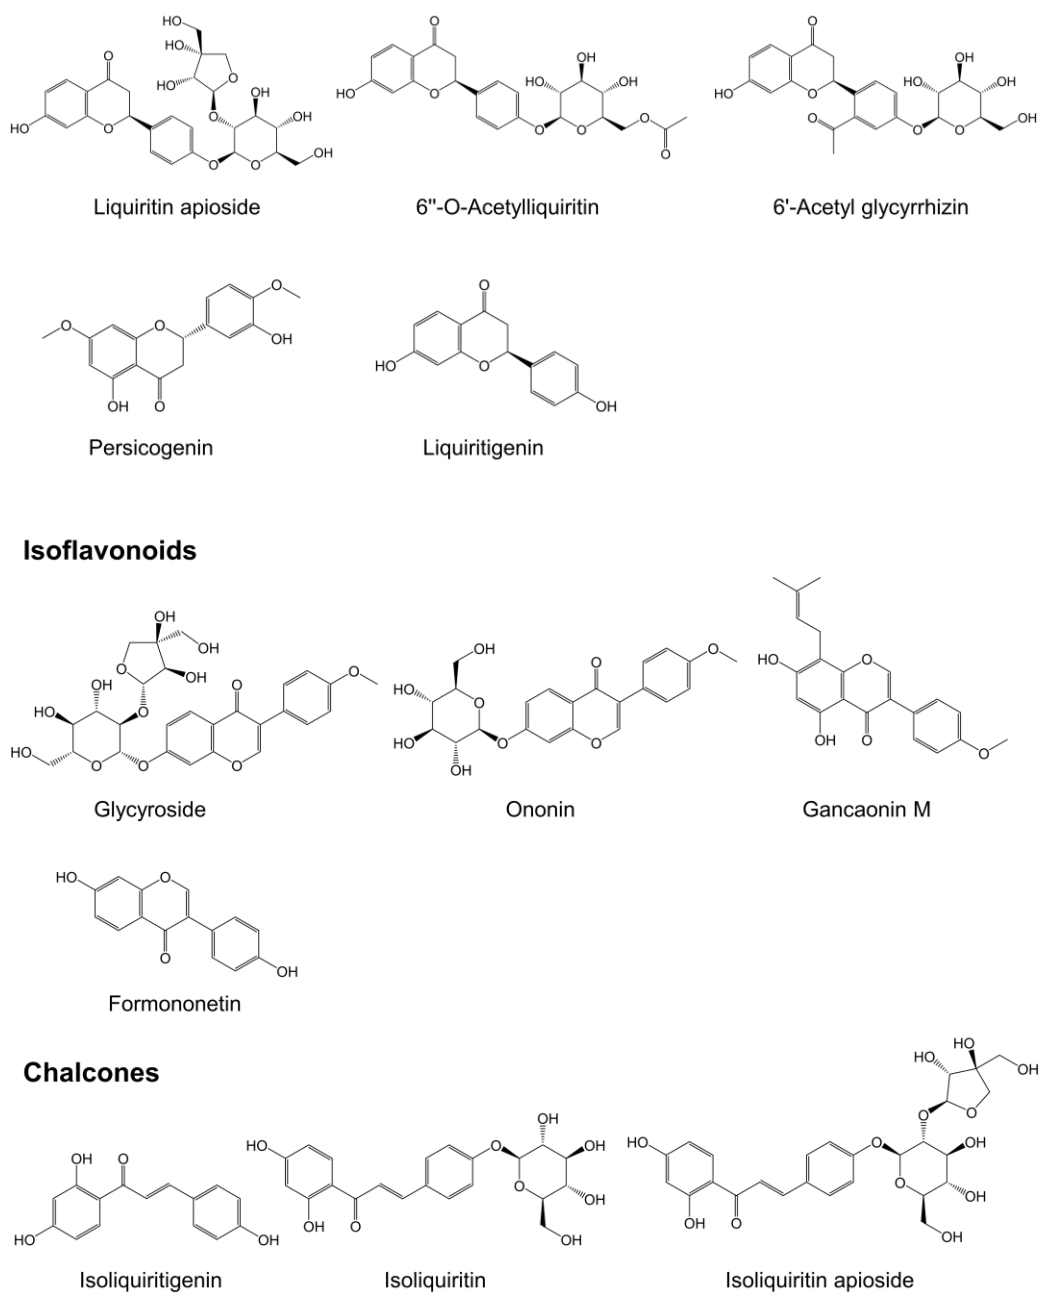

**Fig. S2.** Chemical structures of the flavones in QHSSD.

## Chromones

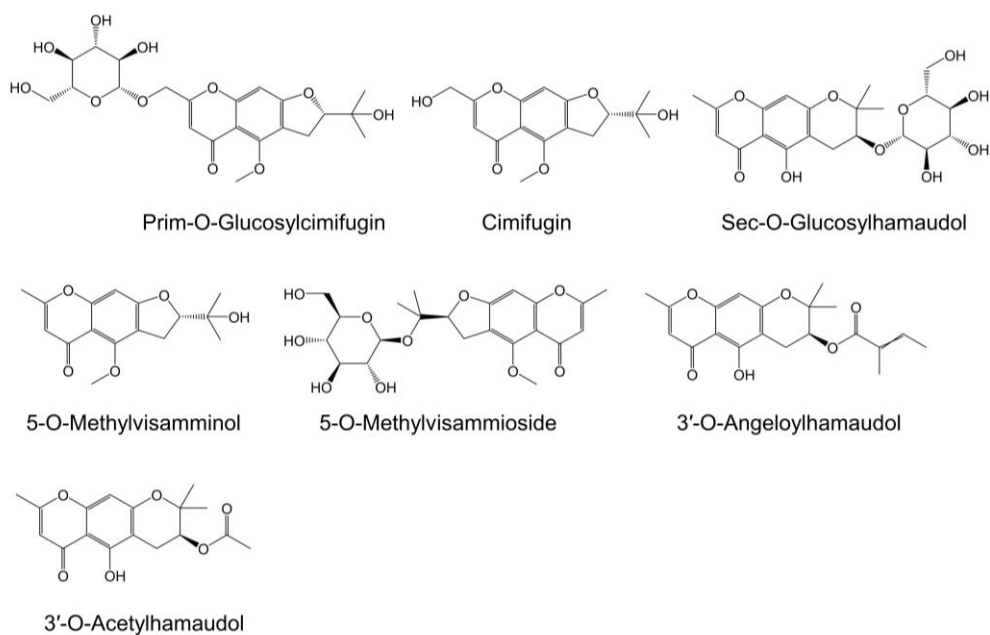

Fig. S3. Chemical structures of the chromones in QHSSD.

## Terpenoids

### Monoterpene

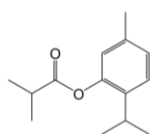

Thymylisobutyrate

### Sesquiterpenes

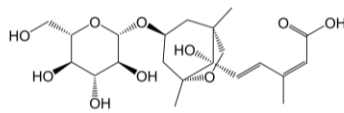

Dihydrophaseic acid-O-glucoside

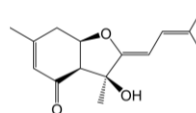

Bisabolangelone

### Iridoids

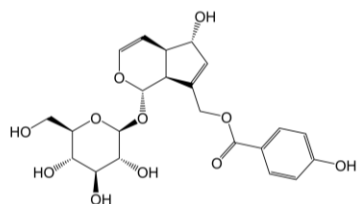

Agnuside

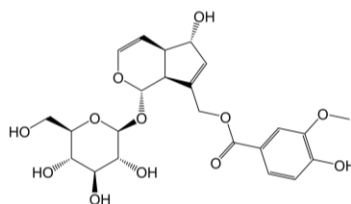

10-O-Vanilloylaucubin

## Diterpene esters

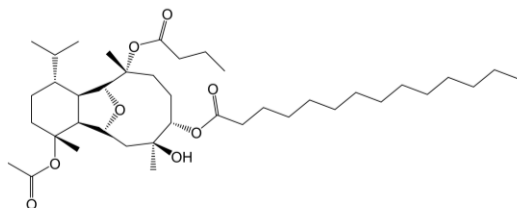

Klysimplexin

## Triterpenes

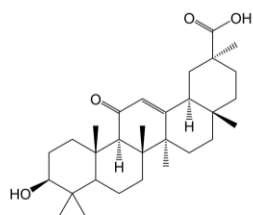

Glycyrrhetic acid

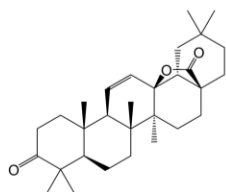

Melliferone

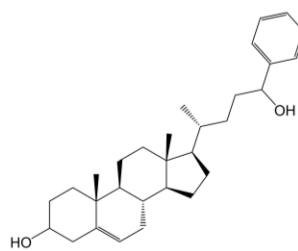

24-Phenylchol-5-ene-3, 24-diol

## Triterpene saponins

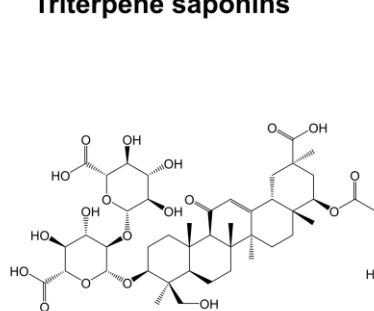

Uralsaponin F

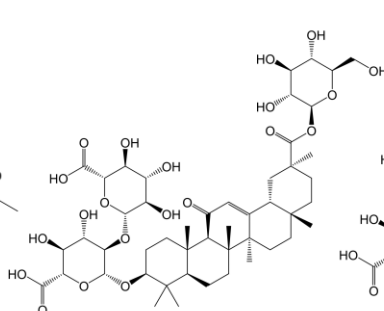

Licoricesaponin A3

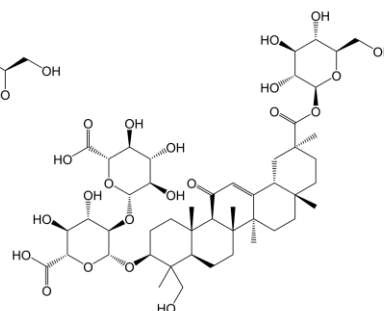

24-Hydroxy-licoricesaponin A3

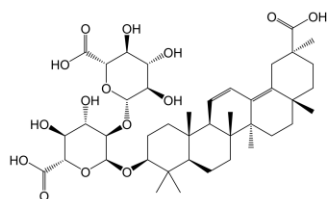

Licoricesaponin C2

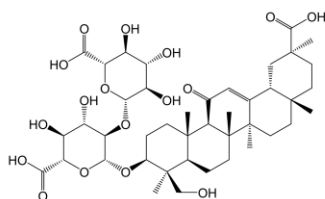

Licoricesaponin G2

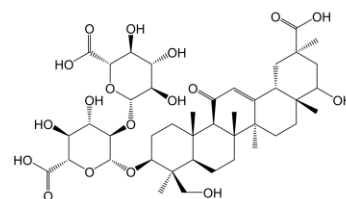

22-Hydroxy-licoricesaponin G2

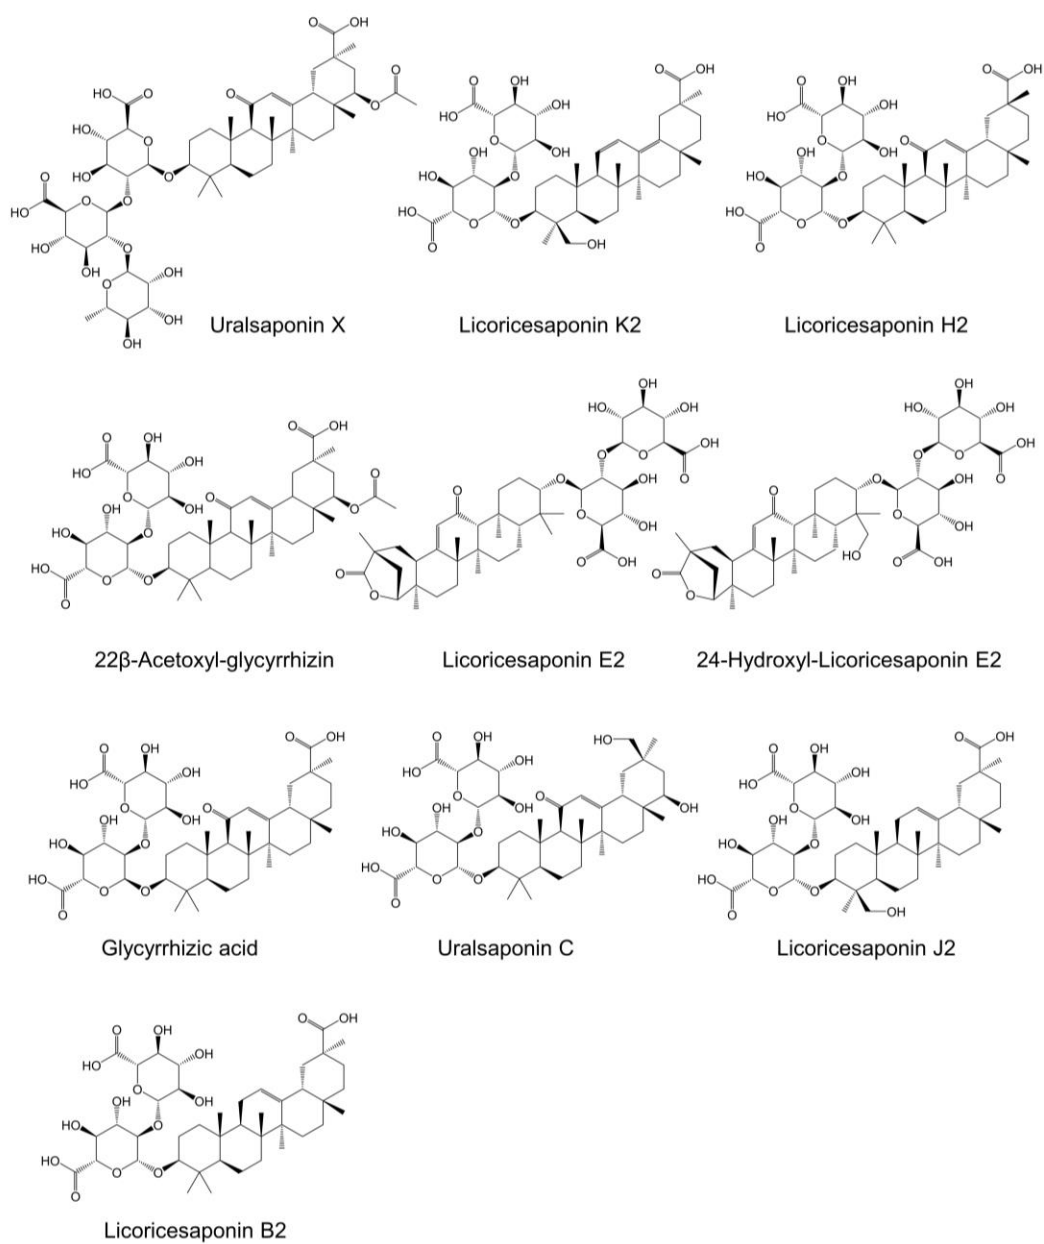

**Fig. S4.** Chemical structures of the terpenoids in QHSSD.

## Phenylpropionic acids

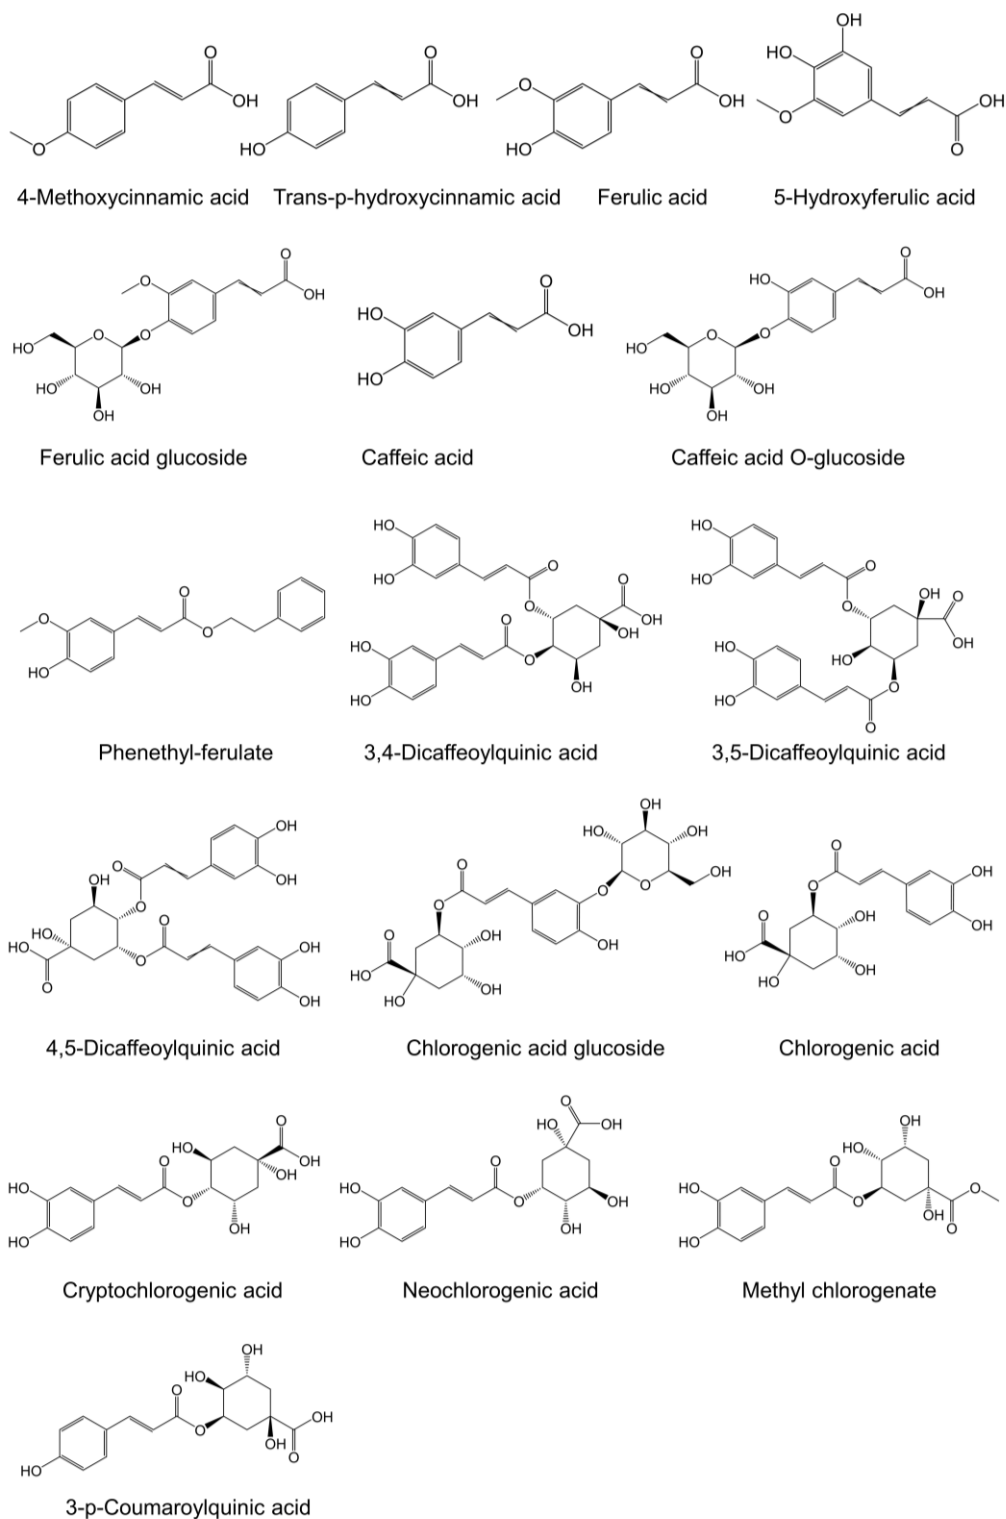

**Fig. S5.** Chemical structures of the phenylpropionic acids in QHSSD.

## Phthalides

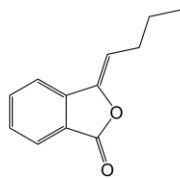

3-Butylidenephthalide

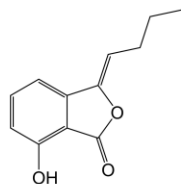

7-hydroxy-3-butylidenephthalide

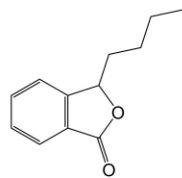

Butylphthalide

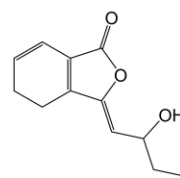

Senkyunolide F

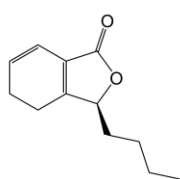

Senkyunolide A

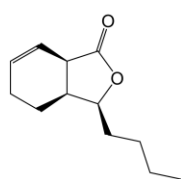

Cnidilide

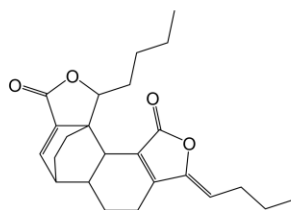

Senkyunolide P

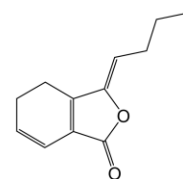

Ligustilide

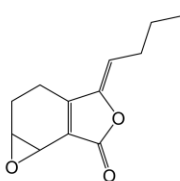

Z-6,7-Epoxygustilide

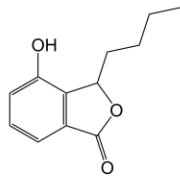

3-Butyl-4-hydroxyphthalide

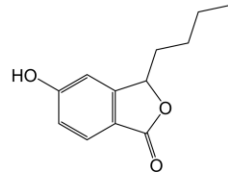

3-Butyl-5-hydroxyphthalide

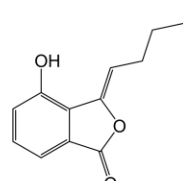

4-Hydroxy-3-Butylidenephthalide

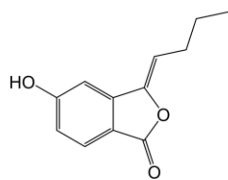

5-Hydroxy-3-Butylidenephthalide

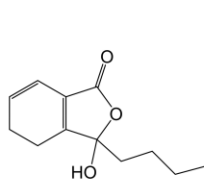

Senkyunolide G

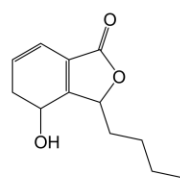

Senkyunolide K

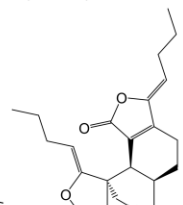

Levistolide A

**Fig. S6.** Chemical structures of the phthalides in QHSSD.

## Organic acids

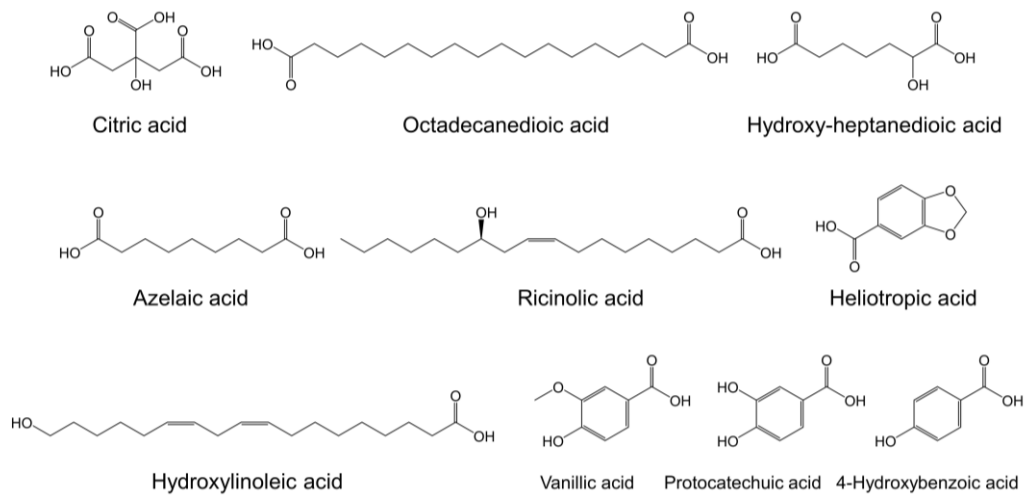

**Fig. S7.** Chemical structures of the organic acids in QHSSD.



### Nucleosides

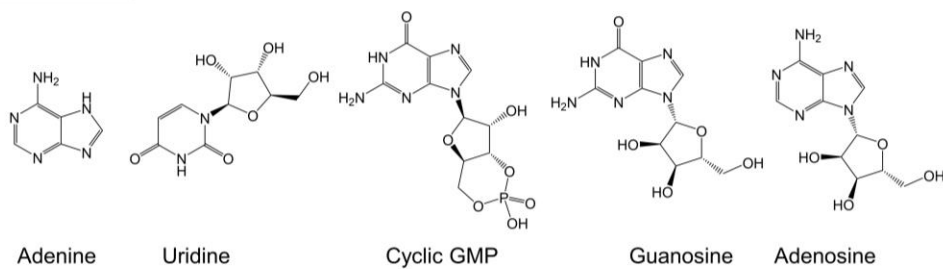

### Amino acids

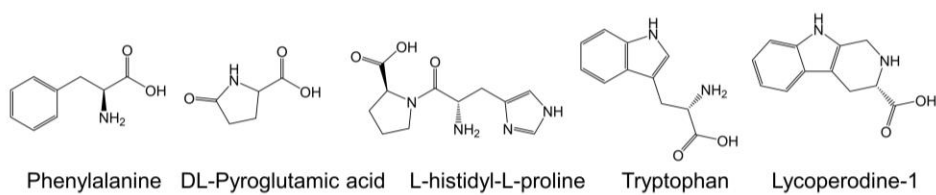

### Other types

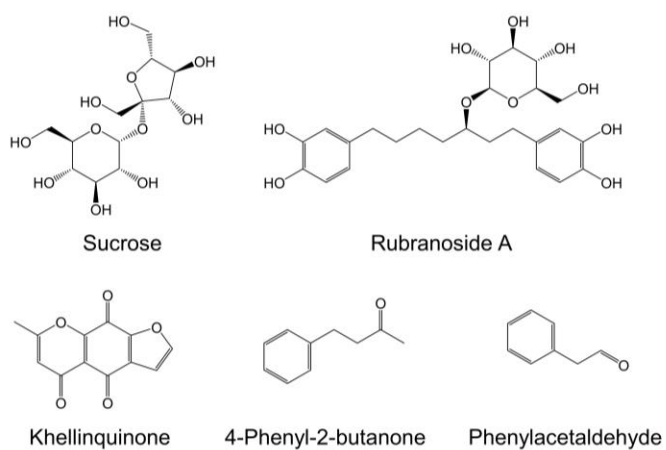

**Fig. S8.** Chemical structures of the nucleosides, amino acids and other types of compounds in QHSSD.

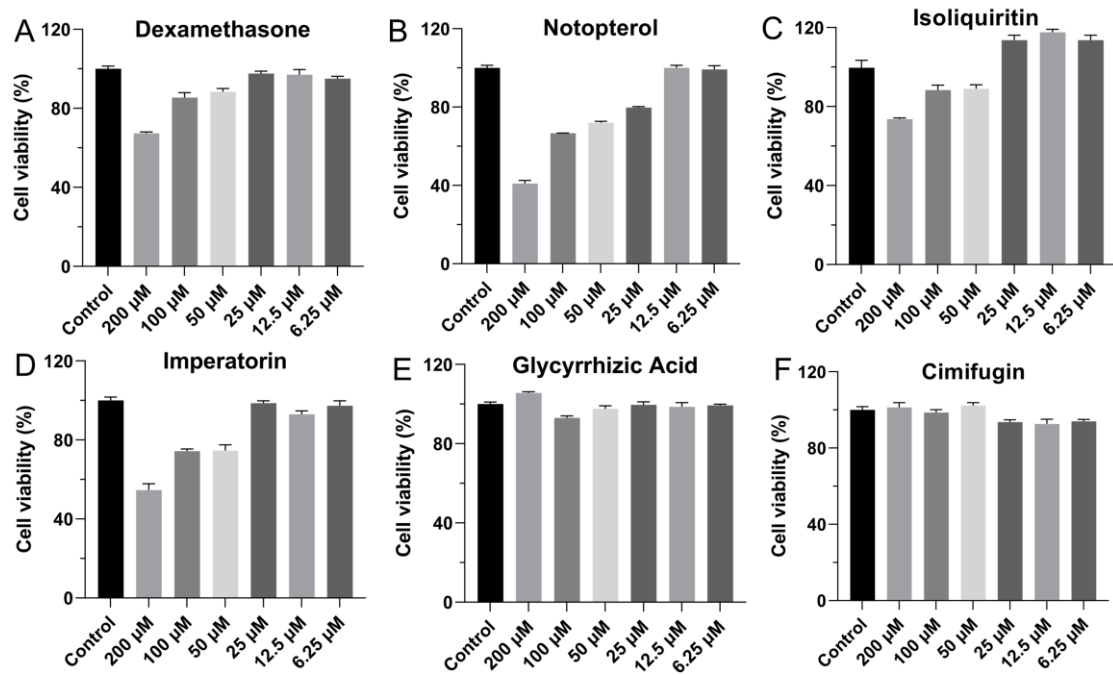

**Fig. S9.** Effects of (A) dexamethasone, (B) notopterol, (C) isoliquiritin, (D) imperatorin, (E) glycyrrhizic acid, (F) cimifugin on viability of RAW 264.7 cells. Safe dosing concentrations were chosen with cell viability > 90% after administration.

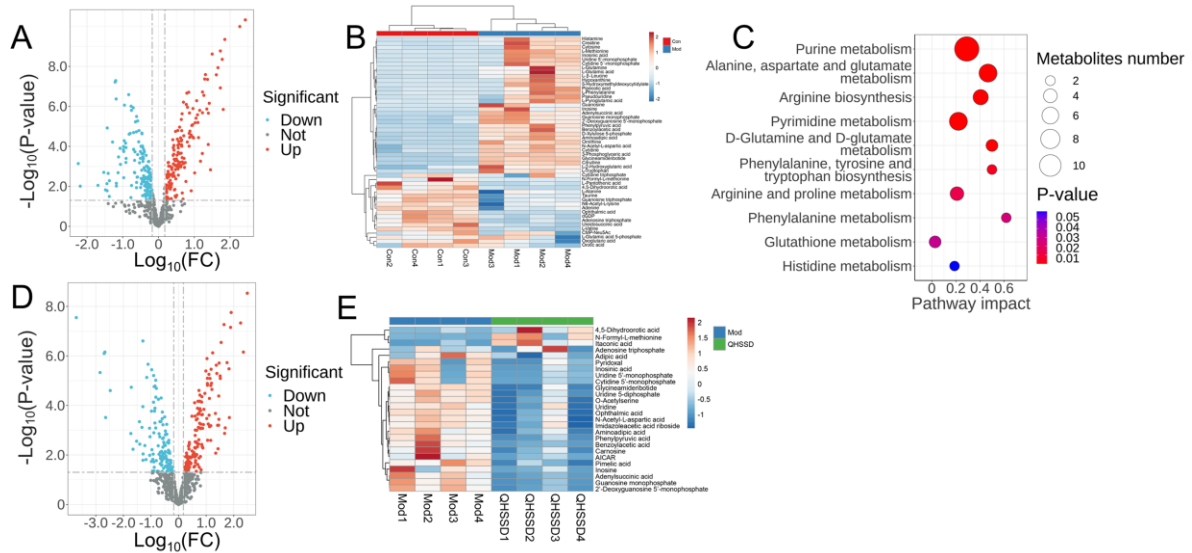

**Fig. S10.** Phenotypic metabolism changes in LPS-induced RAW264.7 cellular metabolomics study. Volcano plots of the samples from model group and control group in the (A) negative mode or (D) positive mode. Heatmap of the differential metabolites in (B) model and control groups or in (E) QHSSD and model groups. (C) The metabolic pathway enrichment analysis of LPS on RAW264.7 cells.

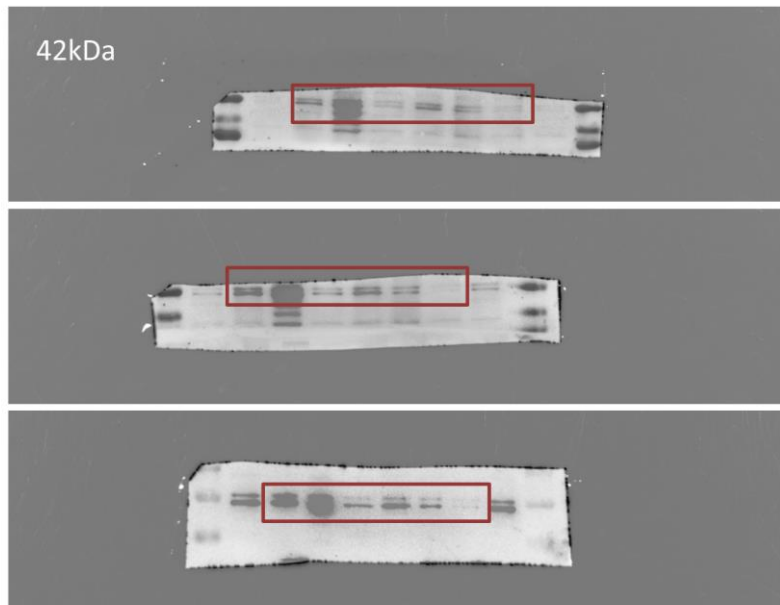

**Fig. S11.** Original image of the western blot experiments (strips of P-ERK, n=3).

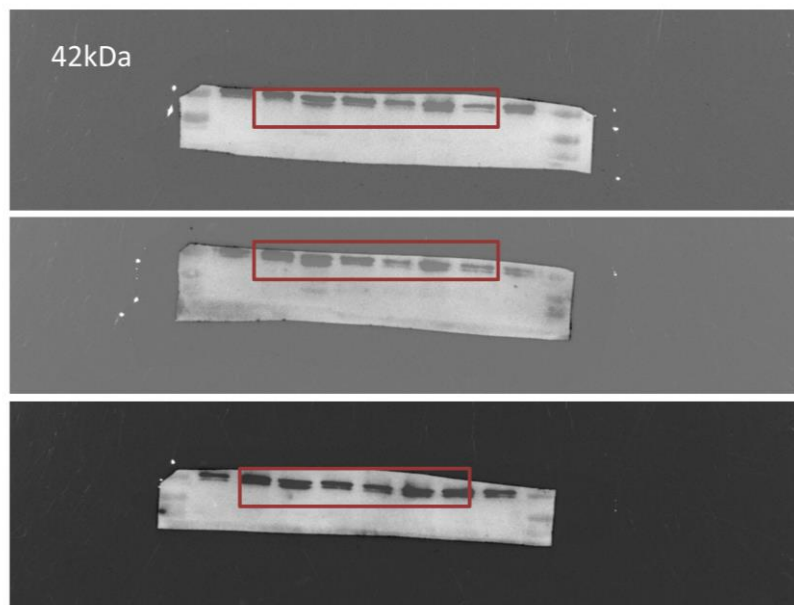

**Fig. S12.** Original image of the western blot experiments (strips of ERK, n=3).

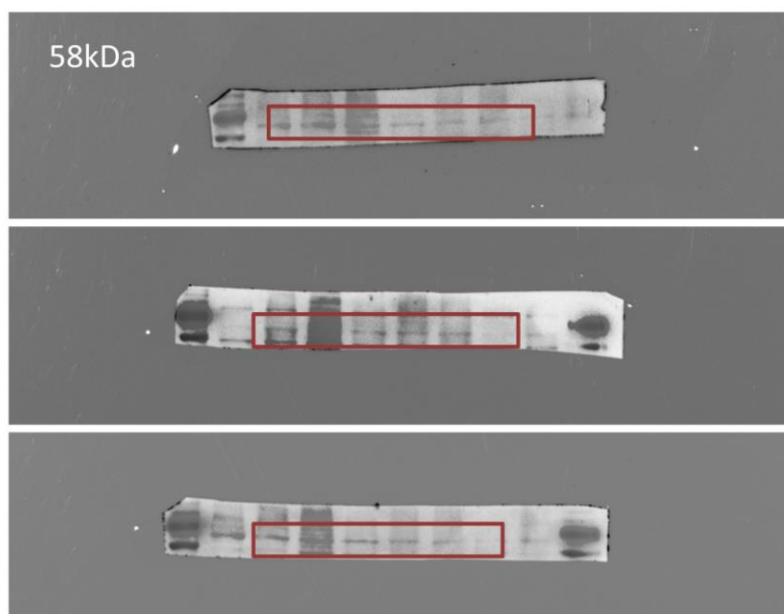

**Fig. S13.** Original image of the western blot experiments (strips of P-AKT, n=3).

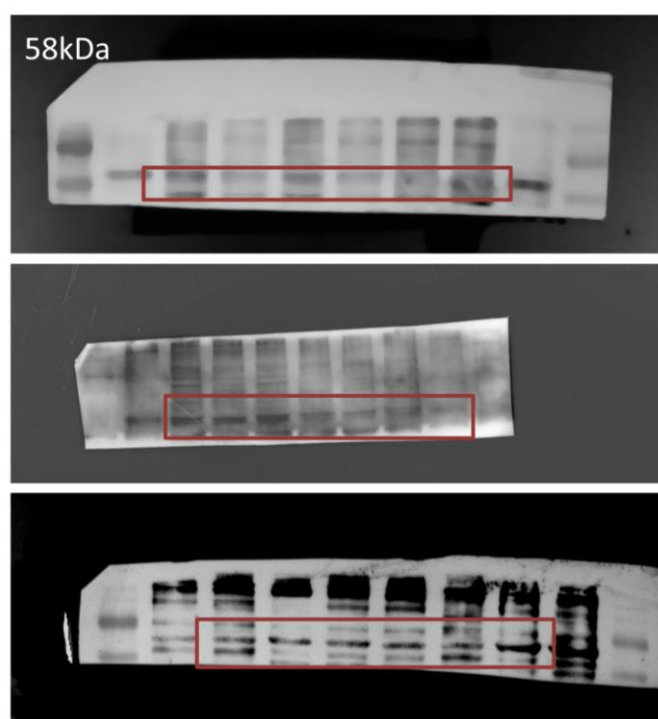

**Fig. S14.** Original image of the western blot experiments (strips of AKT, n=3).

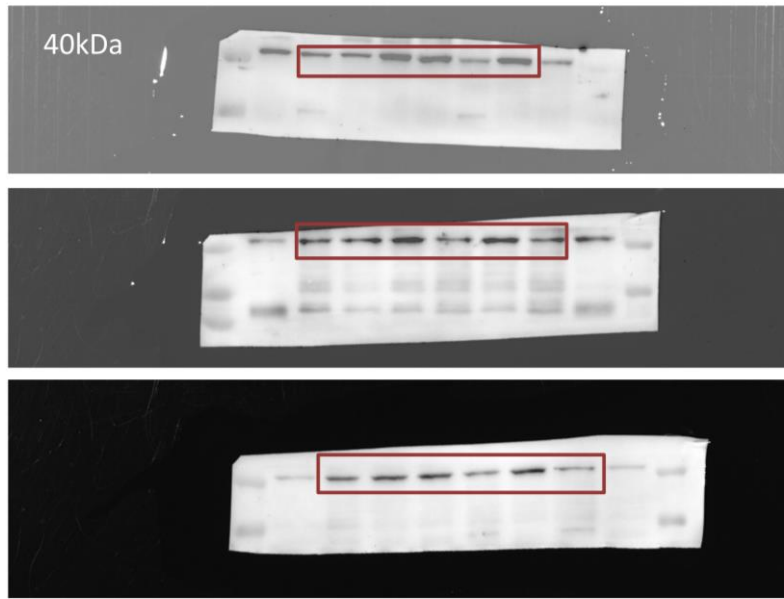

**Fig. S15.** Original image of the western blot experiments (strips of  $\beta$ -actin, n=3).
